# Supplementary material for: Modeling the metabolic interplay between a parasitic worm and its bacterial endosymbiont allows the identification of novel drug targets
Source: eLife. 2020 Aug 11;9:e51850. doi: 10.7554/eLife.51850 (PMC7419141; doi:10.7554/eLife.51850)
Supplement: Supplementary file 2. [file elife-51850-supp2.xlsx]

## Sheet: Supplemental_File_1_metabolomic
Metabolomic analysis of four Brugia malayi life stages
	Metabolite	Formula	Polarity (z)	mz	ppm	RT	RT_range	Detection	1 20AF	2 20AF	4 40AM	5 40AM	6 40AM	7 2e6 Mf	8 2e6 Mf	9 2e6 Mf	10 200 L3	11 200 L3	12 200 L3	AF_vs_AM_ttest_pval	AF_vs_AM_Log2FoldChange	AF_vs_AM_impact_score	AF_vs_L3_ttest_pval	AF_vs_L3_Log2FoldChange	AF_vs_L3_impact_score	AF_vs_Mf_ttest_pval	AF_vs_Mf_Log2FoldChange	AF_vs_Mf_impact_score	AM_vs_AF_ttest_pval	AM_vs_AF_Log2FoldChange	AM_vs_AF_impact_score	AM_vs_L3_ttest_pval	AM_vs_L3_Log2FoldChange	AM_vs_L3_impact_score	AM_vs_Mf_ttest_pval	AM_vs_Mf_Log2FoldChange	AM_vs_Mf_impact_score	L3_vs_AF_ttest_pval	L3_vs_AF_Log2FoldChange	L3_vs_AF_impact_score	L3_vs_AM_ttest_pval	L3_vs_AM_Log2FoldChange	L3_vs_AM_impact_score	L3_vs_Mf_ttest_pval	L3_vs_Mf_Log2FoldChange	L3_vs_Mf_impact_score	Mf_vs_AF_ttest_pval	Mf_vs_AF_Log2FoldChange	Mf_vs_AF_impact_score
0	(15S)-15-Hydroxy-5,8,11-cis-13-trans-eicosatetraenoate	C20H32O3	-	319.228	-9.6	3.18	0.52	11	57240	40861	174637	86955	296592	123691	159606	85654	162432	75175	270441	0.180113	-1.92344	2	0.198672	-1.78766	2	0.0790841	-1.32613	3	0.180113	1.92344	2	0.8502	0.135776	0	0.382985	0.597312	1	0.198672	1.78766	2	0.8502	-0.135776	0	0.485341	0.461536	0	0.0790841	1.32613	3
1	(2S,3S)-3-Hydroxy-2-methylbutanoyl-CoA	C26H44N7O18P3S	+	868.175	-15	9.73	0.43	1	14811	-	-	-	-	-	-	-	-	-	-	0.272228	0.24265	0	0.272228	0.24265	0	0.272228	0.24265	0	0.272228	-0.24265	0	NA	0	0	NA	0	0	0.272228	-0.24265	0	NA	0	0	NA	0	0	0.272228	-0.24265	0
2	(3S)-3-Hydroxyadipyl-CoA	C27H44N7O20P3S	+	912.165	-13.8	11.34	0.73	1	-	-	34080	-	-	-	-	-	-	-	-	0.495025	-0.781615	0	NA	0	0	NA	0	0	0.495025	0.781615	0	0.373901	0.781615	0	0.373901	0.781615	0	NA	0	0	0.373901	-0.781615	0	NA	0	0	NA	0	0
3	(5-L-Glutamyl)-L-amino acid	C8H14N2O5	+	219.097	-4.3	7.52	0.73	5	3022774	3583347	536547	1410844	1181043	-	-	-	-	-	-	0.0107586	1.66333	640	0.000574645	6.09619	199492	0.000574645	6.09619	199492	0.0107586	-1.66333	640	0.0190946	4.43286	617	0.0190946	4.43286	617	0.000574645	-6.09619	199492	0.0190946	-4.43286	617	NA	0	0	0.000574645	-6.09619	199492
4	(6Z,9Z,12Z)-Octadecatrienoic acid	C18H30O2	+	279.232	-4.1	2.86	0.2	11	5421197	15228043	4801306	13196744	8198678	1281041	4504332	920734	18435494	18576098	21405124	0.763009	0.241665	15	0.0986404	-0.91533	285	0.132343	2.2075	219	0.763009	-0.241665	15	0.0149206	-1.15699	2108	0.0732289	1.96584	293	0.0986404	0.91533	285	0.0149206	1.15699	2108	0.000322732	3.12283	292959	0.132343	-2.2075	219
5	(R)-4'-Phosphopantothenoyl-L-cysteine	C12H23N2O9PS	+	403.094	5	6.91	0.75	5	23121	21848	20494	17054	28657	-	-	-	-	-	-	0.93165	0.0269531	0	0.000148482	1.05177	233	0.000148482	1.05177	233	0.93165	-0.0269531	0	0.0310341	1.02481	1	0.0310341	1.02481	1	0.000148482	-1.05177	233	0.0310341	-1.02481	1	NA	0	0	0.000148482	-1.05177	233
6	(R)-5-Diphosphomevalonate	C6H14O10P2	+	309.014	10.4	3.36	0.12	11	297954	303044	644640	472392	263918	225302	230307	189668	378940	275312	479953	0.342626	-0.615266	2	0.384131	-0.331287	1	0.0142902	0.482404	25	0.342626	0.615266	2	0.546251	0.28398	1	0.0913225	1.09767	8	0.384131	0.331287	1	0.546251	-0.28398	1	0.0543061	0.813691	10	0.0142902	-0.482404	25
7	(R)-5-Phosphomevalonate	C6H13O7P	-	227.033	-8.9	11.54	0.58	3	72672	101866	27819	-	-	-	-	-	-	-	-	0.011186	2.12079	21	0.00728826	2.43054	38	0.00728826	2.43054	38	0.011186	-2.12079	21	0.373901	0.309756	0	0.373901	0.309756	0	0.00728826	-2.43054	38	0.373901	-0.309756	0	NA	0	0	0.00728826	-2.43054	38
8	(R)-Lactate	C3H6O3	-	89.0244	-14.8	0.01	0.3	2	-	2890231	-	-	-	-	-	-	-	3351583	-	0.272228	0.127526	10	0.865636	-0.0419573	3	0.272228	0.127526	10	0.272228	-0.127526	10	0.373901	-0.169483	8	NA	0	0	0.865636	0.0419573	3	0.373901	0.169483	8	0.373901	0.169483	8	0.272228	-0.127526	10
9	(R)-Mevalonate	C6H12O4	-	147.066	0.1	2.52	0.9	0	-	-	-	-	-	-	-	-	-	-	-	NA	0	0	NA	0	0	NA	0	0	NA	0	0	NA	0	0	NA	0	0	NA	0	0	NA	0	0	NA	0	0	NA	0	0
10	(R)-S-Lactoylglutathione	C13H21N3O8S	+	380.112	6.3	2.85	0.28	10	251838	567282	1072809	1805118	905258	197996	246529	-	593280	565292	713088	0.108201	-1.62249	24	0.201155	-0.607209	4	0.181911	1.39171	4	0.108201	1.62249	24	0.0851877	1.01528	22	0.0177727	3.0142	322	0.201155	0.607209	4	0.0851877	-1.01528	22	0.0045491	1.99892	343	0.181911	-1.39171	4
11	(S)-3-Hydroxy-3-methylglutaryl-CoA	C27H44N7O20P3S	+	912.165	-13.8	11.34	0.73	1	-	-	34080	-	-	-	-	-	-	-	-	0.495025	-0.781615	0	NA	0	0	NA	0	0	0.495025	0.781615	0	0.373901	0.781615	0	0.373901	0.781615	0	NA	0	0	0.373901	-0.781615	0	NA	0	0	NA	0	0
12	(S)-3-Hydroxydodecanoyl-CoA	C33H58N7O18P3S	+	966.284	12.3	7.44	0.42	1	-	21650	-	-	-	-	-	-	-	-	-	0.272228	0.662205	0	0.272228	0.662205	0	0.272228	0.662205	0	0.272228	-0.662205	0	NA	0	0	NA	0	0	0.272228	-0.662205	0	NA	0	0	NA	0	0	0.272228	-0.662205	0
13	(S)-3-Hydroxyisobutyrate	C4H8O3	-	103.04	-12.3	0.08	0.08	0	-	-	-	-	-	-	-	-	-	-	-	NA	0	0	NA	0	0	NA	0	0	NA	0	0	NA	0	0	NA	0	0	NA	0	0	NA	0	0	NA	0	0	NA	0	0
14	(S)-3-Hydroxyisobutyryl-CoA	C25H42N7O18P3S	+	854.159	12	15.95	0.47	1	-	-	-	-	-	19002	-	-	-	-	-	NA	0	0	NA	0	0	0.495025	-0.142769	0	NA	0	0	NA	0	0	0.373901	-0.142769	0	NA	0	0	NA	0	0	0.373901	-0.142769	0	0.495025	0.142769	0
15	(S)-3-Hydroxyoctanoyl-CoA	C29H50N7O18P3S	+	910.222	11.6	19.8	0.67	1	-	-	-	17415	-	-	-	-	-	-	-	0.495025	-0.269618	0	NA	0	0	NA	0	0	0.495025	0.269618	0	0.373901	0.269618	0	0.373901	0.269618	0	NA	0	0	0.373901	-0.269618	0	NA	0	0	NA	0	0
16	(S)-Dihydroorotate	C5H6N2O4	-	157.025	-7.5	8.47	0.79	5	749833	891787	235867	294205	327976	-	-	-	-	-	-	0.00347814	1.52095	457	0.000899968	2.8697	3789	0.000899968	2.8697	3789	0.00347814	-1.52095	457	0.00296179	1.34874	171	0.00296179	1.34874	171	0.000899968	-2.8697	3789	0.00296179	-1.34874	171	NA	0	0	0.000899968	-2.8697	3789
17	(S)-Hydroxydecanoyl-CoA	C31H54N7O18P3S	-	936.239	13.1	3.38	0.25	2	-	-	-	-	-	-	-	38136	36470	-	-	NA	0	0	0.495025	-0.287593	0	0.495025	-0.317196	0	NA	0	0	0.373901	-0.287593	0	0.373901	-0.317196	0	0.495025	0.287593	0	0.373901	0.287593	0	0.942622	-0.029603	0	0.495025	0.317196	0
18	(S)-Hydroxyhexanoyl-CoA	C27H46N7O18P3S	+	882.191	-0.8	6.02	0.32	1	-	-	-	20155	-	-	-	-	-	-	-	0.495025	-0.420617	0	NA	0	0	NA	0	0	0.495025	0.420617	0	0.373901	0.420617	0	0.373901	0.420617	0	NA	0	0	0.373901	-0.420617	0	NA	0	0	NA	0	0
19	(S)-Lactate	C3H6O3	-	89.0244	-14.8	0.01	0.3	2	-	2890231	-	-	-	-	-	-	-	3351583	-	0.272228	0.127526	10	0.865636	-0.0419573	3	0.272228	0.127526	10	0.272228	-0.127526	10	0.373901	-0.169483	8	NA	0	0	0.865636	0.0419573	3	0.373901	0.169483	8	0.373901	0.169483	8	0.272228	-0.127526	10
20	(S)-Malate	C4H6O5	-	133.014	-12.4	13.21	0.09	9	33622764	27465844	24984004	13306003	16785814	31793220	13543075	48173432	-	-	2795352	0.0936911	0.734447	434	0.00119117	3.8055	192087	0.964951	-0.0292506	33	0.0936911	-0.734447	434	0.00963067	3.07105	8963	0.292738	-0.763697	144	0.00119117	-3.8055	192087	0.00963067	-3.07105	8963	0.0442655	-3.83475	5376	0.964951	0.0292506	33
21	(S)-Methylmalonate semialdehyde	C4H6O3	-	101.024	-15	11.22	0.8	9	287811	290500	4942090	1720178	2267635	117267	-	-	126888	240923	125865	0.127603	-3.36376	132	0.0856429	0.813244	5	5.23428e-06	1.34286	97684	0.127603	3.36376	132	0.0476766	4.17701	596	0.0451949	4.70662	893	0.0856429	-0.813244	5	0.0476766	-4.17701	596	0.256401	0.529615	1	5.23428e-06	-1.34286	97684
22	(S)-Methylmalonyl-CoA	C25H40N7O19P3S	-	866.124	4	0.52	0.28	0	-	-	-	-	-	-	-	-	-	-	-	NA	0	0	NA	0	0	NA	0	0	NA	0	0	NA	0	0	NA	0	0	NA	0	0	NA	0	0	NA	0	0	NA	0	0
23	[Dihydrolipoyllysine-residue acetyltransferase] S-acetyldihydrolipoyllysine	C10H19NO2S2	-	248.078	-2.2	2.84	0.93	1	-	-	447093	-	-	-	-	-	-	-	-	0.495025	-0.066293	1	NA	0	0	NA	0	0	0.495025	0.066293	1	0.373901	0.066293	1	0.373901	0.066293	1	NA	0	0	0.373901	-0.066293	1	NA	0	0	NA	0	0
24	[Dihydrolipoyllysine-residue succinyltransferase] S-glutaryldihydrolipoyllysine	C13H23NO4S2	-	320.1	-1.2	10.98	0.83	8	479472	518837	758831	923888	975768	70971	48514	56874	-	-	-	0.020298	-0.828085	61	6.64556e-05	4.14237	70077	0.000124756	3.08593	18987	0.020298	0.828085	61	0.000195061	4.97046	73486	0.000229278	3.91402	31064	6.64556e-05	-4.14237	70077	0.000195061	-4.97046	73486	0.00960677	-1.05644	9	0.000124756	-3.08593	18987
25	1-(5-Phospho-D-ribosyl)-5-amino-4-imidazolecarboxylate	C9H14N3O9P	+	340.054	14	4.64	0.22	2	-	-	34094	35112	-	-	-	-	-	-	-	0.219328	-1.40065	0	NA	0	0	NA	0	0	0.219328	1.40065	0	0.116287	1.40065	0	0.116287	1.40065	0	NA	0	0	0.116287	-1.40065	0	NA	0	0	NA	0	0
26	1-(5'-Phosphoribosyl)-5-amino-4-(N-succinocarboxamide)-imidazole	C13H19N4O12P	+	455.081	9.3	6.85	0.13	3	-	-	12827	14595	17930	-	-	-	-	-	-	0.114884	-0.476781	0	NA	0	0	NA	0	0	0.114884	0.476781	0	0.0466947	0.476781	0	0.0466947	0.476781	0	NA	0	0	0.0466947	-0.476781	0	NA	0	0	NA	0	0
27	1-(5'-Phosphoribosyl)-5-amino-4-imidazolecarboxamide	C9H15N4O8P	-	337.055	14.6	11.73	0.19	8	46509	74623	83745	49801	65456	82537	79410	80026	-	-	-	0.748826	-0.13124	0	0.0169553	2.59851	13	0.152962	-0.413304	1	0.748826	0.13124	0	0.00455465	2.72975	56	0.219772	-0.282063	0	0.0169553	-2.59851	13	0.00455465	-2.72975	56	2.01114e-07	-3.01181	1817937	0.152962	0.413304	1
28	1-(5'-Phosphoribosyl)-5-formamido-4-imidazolecarboxamide	C10H15N4O9P	+	367.065	-7.2	2.87	0.08	4	-	-	-	31344	-	83399	40172	71854	-	-	-	0.495025	-0.775233	0	NA	0	0	0.0455484	-2.70358	5	0.495025	0.775233	0	0.373901	0.775233	0	0.031204	-1.92835	5	NA	0	0	0.373901	-0.775233	0	0.0129783	-2.70358	19	0.0455484	2.70358	5
29	1,7-Dimethylxanthine	C7H8N4O2	-	179.057	-14.8	11.12	0.62	6	1485453	1376017	8940996	5980800	4727112	-	-	-	-	2002693	-	0.0503661	-2.19466	363	0.664206	0.286464	2	0.000485522	0.915986	4253	0.0503661	2.19466	363	0.0150422	2.48112	1433	0.00976412	3.11064	3232	0.664206	-0.286464	2	0.0150422	-2.48112	1433	0.373901	0.629523	4	0.000485522	-0.915986	4253
30	10-Formyltetrahydrofolate	C20H23N7O7	+	474.173	7.4	8.24	0.19	2	66269	-	-	-	131219	-	-	-	-	-	-	0.841219	-0.402508	0	0.272228	1.9311	0	0.272228	1.9311	0	0.841219	0.402508	0	0.373901	2.33361	0	0.373901	2.33361	0	0.272228	-1.9311	0	0.373901	-2.33361	0	NA	0	0	0.272228	-1.9311	0
31	11,12,15-THETA	C20H34O5	+	355.248	-10.7	2.78	0.26	7	31707	-	42702	25266	40478	289300	46507	122225	-	-	-	0.253031	-0.752662	0	0.272228	0.937524	0	0.252701	-2.83113	2	0.253031	0.752662	0	0.0103933	1.69019	7	0.180551	-2.07847	2	0.272228	-0.937524	0	0.0103933	-1.69019	7	0.119823	-3.76866	9	0.252701	2.83113	2
32	11,12-EET	C20H32O3	-	319.228	-9.6	3.18	0.52	11	57240	40861	174637	86955	296592	123691	159606	85654	162432	75175	270441	0.180113	-1.92344	2	0.198672	-1.78766	2	0.0790841	-1.32613	3	0.180113	1.92344	2	0.8502	0.135776	0	0.382985	0.597312	1	0.198672	1.78766	2	0.8502	-0.135776	0	0.485341	0.461536	0	0.0790841	1.32613	3
33	11,14,15-THETA	C20H34O5	+	355.248	-10.7	2.78	0.26	7	31707	-	42702	25266	40478	289300	46507	122225	-	-	-	0.253031	-0.752662	0	0.272228	0.937524	0	0.252701	-2.83113	2	0.253031	0.752662	0	0.0103933	1.69019	7	0.180551	-2.07847	2	0.272228	-0.937524	0	0.0103933	-1.69019	7	0.119823	-3.76866	9	0.252701	2.83113	2
34	11H-14,15-EETA	C20H32O4	+	337.237	-10.2	2.85	0.45	10	73767	86631	59277	207457	165580	107570	142868	225447	45330	171533	-	0.344866	-0.845461	1	0.981322	0.0281283	0	0.182152	-0.983994	1	0.344866	0.845461	1	0.367545	0.873589	1	0.809024	-0.138533	0	0.981322	-0.0281283	0	0.367545	-0.873589	1	0.244056	-1.01212	1	0.182152	0.983994	1
35	12(13)-EpOME	C18H32O3	-	295.228	-4.6	2.88	0.46	11	4381895	6323732	4957707	9168192	14619672	10108219	4904268	5279747	13387500	9252820	17862198	0.334063	-0.840008	40	0.0895352	-1.33468	266	0.579915	-0.337596	13	0.334063	0.840008	40	0.354068	-0.494672	46	0.436194	0.502412	27	0.0895352	1.33468	266	0.354068	0.494672	46	0.0879233	0.997084	230	0.579915	0.337596	13
36	14,15-EET	C20H32O3	-	319.228	-9.6	3.18	0.52	11	57240	40861	174637	86955	296592	123691	159606	85654	162432	75175	270441	0.180113	-1.92344	2	0.198672	-1.78766	2	0.0790841	-1.32613	3	0.180113	1.92344	2	0.8502	0.135776	0	0.382985	0.597312	1	0.198672	1.78766	2	0.8502	-0.135776	0	0.485341	0.461536	0	0.0790841	1.32613	3
37	15(S)-HPETE	C20H32O4	+	337.237	-10.2	2.85	0.45	10	73767	86631	59277	207457	165580	107570	142868	225447	45330	171533	-	0.344866	-0.845461	1	0.981322	0.0281283	0	0.182152	-0.983994	1	0.344866	0.845461	1	0.367545	0.873589	1	0.809024	-0.138533	0	0.981322	-0.0281283	0	0.367545	-0.873589	1	0.244056	-1.01212	1	0.182152	0.983994	1
38	15H-11,12-EETA	C20H32O4	+	337.237	-10.2	2.85	0.45	10	73767	86631	59277	207457	165580	107570	142868	225447	45330	171533	-	0.344866	-0.845461	1	0.981322	0.0281283	0	0.182152	-0.983994	1	0.344866	0.845461	1	0.367545	0.873589	1	0.809024	-0.138533	0	0.981322	-0.0281283	0	0.367545	-0.873589	1	0.244056	-1.01212	1	0.182152	0.983994	1
39	16(R)-HETE	C20H32O3	-	319.228	-9.6	3.18	0.52	11	57240	40861	174637	86955	296592	123691	159606	85654	162432	75175	270441	0.180113	-1.92344	2	0.198672	-1.78766	2	0.0790841	-1.32613	3	0.180113	1.92344	2	0.8502	0.135776	0	0.382985	0.597312	1	0.198672	1.78766	2	0.8502	-0.135776	0	0.485341	0.461536	0	0.0790841	1.32613	3
40	19(S)-HETE	C20H32O3	-	319.228	-9.6	3.18	0.52	11	57240	40861	174637	86955	296592	123691	159606	85654	162432	75175	270441	0.180113	-1.92344	2	0.198672	-1.78766	2	0.0790841	-1.32613	3	0.180113	1.92344	2	0.8502	0.135776	0	0.382985	0.597312	1	0.198672	1.78766	2	0.8502	-0.135776	0	0.485341	0.461536	0	0.0790841	1.32613	3
41	1-Acyl-sn-glycero-3-phosphocholine	C26H52NO7P	+	522.355	-2.3	3.19	0.12	6	83000	-	119145	-	122313	1390799	1051558	766436	-	-	-	0.53868	-0.821298	0	0.272228	1.8839	0	0.0223321	-4.47779	558	0.53868	0.821298	0	0.116203	2.7052	3	0.00587798	-3.65649	1238	0.272228	-1.8839	0	0.116203	-2.7052	3	0.00424631	-6.36169	10483	0.0223321	4.47779	558
42	1-Deoxy-D-xylulose 5-phosphate	C5H11O7P	-	213.017	-8.7	10.98	0.53	6	27502	24896	42813	31039	110076	-	-	-	-	10161	-	0.35013	-1.22659	0	0.000477424	1.38179	99	0.00046918	1.38951	101	0.35013	1.22659	0	0.10579	2.60838	2	0.105529	2.61611	2	0.000477424	-1.38179	99	0.10579	-2.60838	2	0.373901	0.00772176	0	0.00046918	-1.38951	101
43	1D-myo-Inositol 3-phosphate	C6H13O9P	-	259.022	-4.8	13.99	0.09	7	13248660	6775914	8517686	5067621	5726525	-	-	674002	-	673201	-	0.287553	0.637249	44	0.0304004	3.91915	2656	0.0304026	3.91857	2655	0.287553	-0.637249	44	0.00546455	3.2819	6318	0.00546549	3.28132	6314	0.0304004	-3.91915	2656	0.00546455	-3.2819	6318	0.975659	-0.000581897	1	0.0304026	-3.91857	2655
44	1-Phosphatidyl-D-myo-inositol	C11H19O13P	+	391.064	-11.8	11.45	0.89	1	-	-	36938	-	-	-	-	-	-	-	-	0.495025	-0.865672	0	NA	0	0	NA	0	0	0.495025	0.865672	0	0.373901	0.865672	0	0.373901	0.865672	0	NA	0	0	0.373901	-0.865672	0	NA	0	0	NA	0	0
45	2-(alpha-Hydroxyethyl)thiamine diphosphate	C14H23N4O8P2S	+	470.079	1.6	7.65	0.4	1	-	-	-	-	-	-	-	-	-	12617	-	NA	0	0	0.495025	-0.0330455	0	NA	0	0	NA	0	0	0.373901	-0.0330455	0	NA	0	0	0.495025	0.0330455	0	0.373901	0.0330455	0	0.373901	0.0330455	0	NA	0	0
46	2-(Formamido)-N1-(5'-phosphoribosyl)acetamidine	C8H16N3O8P	+	314.075	15	11.15	0.01	0	-	-	-	-	-	-	-	-	-	-	-	NA	0	0	NA	0	0	NA	0	0	NA	0	0	NA	0	0	NA	0	0	NA	0	0	NA	0	0	NA	0	0	NA	0	0
47	2,3,4,5-Tetrahydrodipicolinate	C7H9NO4	+	172.06	-3.7	11.44	0.83	11	2882543	3056552	2318051	903306	1357516	51367	32001	39273	32010	22424	16408	0.0762416	0.960213	57	2.37718e-05	6.97446	7916970	2.43548e-05	6.18269	4489404	0.0762416	-0.960213	57	0.0226959	6.01424	2207	0.0235531	5.22248	1242	2.37718e-05	-6.97446	7916970	0.0226959	-6.01424	2207	0.0758155	-0.791765	1	2.43548e-05	-6.18269	4489404
48	2-Acyl-1-(1-alkenyl)-sn-glycero-3-phosphate	C37H69O7P	+	657.485	-0.7	3.86	0.04	1	-	-	-	-	17786	-	-	-	-	-	-	0.495025	-0.269472	0	NA	0	0	NA	0	0	0.495025	0.269472	0	0.373901	0.269472	0	0.373901	0.269472	0	NA	0	0	0.373901	-0.269472	0	NA	0	0	NA	0	0
49	2-Amino-3-carboxymuconate semialdehyde	C7H7NO5	-	184.025	11.7	10.43	0.7	11	123389	114200	140077	90080	99136	147476	176852	118766	150809	158667	146464	0.684418	0.114059	0	0.0103057	-0.355413	17	0.278881	-0.314182	1	0.684418	-0.114059	0	0.0555919	-0.469472	3	0.170812	-0.428241	1	0.0103057	0.355413	17	0.0555919	0.469472	3	0.815074	0.0412312	0	0.278881	0.314182	1
50	2-Aminoethylphosphonate	C2H8NO3P	-	124.017	12.9	0.13	0.1	0	-	-	-	-	-	-	-	-	-	-	-	NA	0	0	NA	0	0	NA	0	0	NA	0	0	NA	0	0	NA	0	0	NA	0	0	NA	0	0	NA	0	0	NA	0	0
51	2-Aminomuconate	C6H7NO4	-	156.03	1.7	4.37	0.91	0	-	-	-	-	-	-	-	-	-	-	-	NA	0	0	NA	0	0	NA	0	0	NA	0	0	NA	0	0	NA	0	0	NA	0	0	NA	0	0	NA	0	0	NA	0	0
52	2-Aminomuconate semialdehyde	C6H7NO3	-	140.035	-10.1	1.53	0.81	0	-	-	-	-	-	-	-	-	-	-	-	NA	0	0	NA	0	0	NA	0	0	NA	0	0	NA	0	0	NA	0	0	NA	0	0	NA	0	0	NA	0	0	NA	0	0
53	2-Deoxy-D-ribose 1-phosphate	C5H11O7P	-	213.017	-8.7	10.98	0.53	6	27502	24896	42813	31039	110076	-	-	-	-	10161	-	0.35013	-1.22659	0	0.000477424	1.38179	99	0.00046918	1.38951	101	0.35013	1.22659	0	0.10579	2.60838	2	0.105529	2.61611	2	0.000477424	-1.38179	99	0.10579	-2.60838	2	0.373901	0.00772176	0	0.00046918	-1.38951	101
54	2-Deoxy-D-ribose 5-phosphate	C5H11O7P	-	213.017	-8.7	10.98	0.53	6	27502	24896	42813	31039	110076	-	-	-	-	10161	-	0.35013	-1.22659	0	0.000477424	1.38179	99	0.00046918	1.38951	101	0.35013	1.22659	0	0.10579	2.60838	2	0.105529	2.61611	2	0.000477424	-1.38179	99	0.10579	-2.60838	2	0.373901	0.00772176	0	0.00046918	-1.38951	101
55	2'-Deoxyinosine 5'-phosphate	C10H13N4O7P	+	333.06	2.8	11.23	0.59	8	474051	265579	375011	223929	99775	67949	33593	42712	-	-	-	0.365799	0.667062	1	0.0194927	4.75925	266	0.0265565	2.94315	61	0.365799	-0.667062	1	0.0511077	4.09219	41	0.0826373	2.27609	8	0.0194927	-4.75925	266	0.0511077	-4.09219	41	0.0285492	-1.81609	4	0.0265565	-2.94315	61
56	2-Hexaprenyl-3-methyl-5-hydroxy-6-methoxy-1,4-benzoquinone	C38H56O4	-	575.411	5.1	2.67	0.27	2	-	-	-	-	-	-	34622	-	-	32096	-	NA	0	0	0.495025	-0.79621	0	0.495025	-0.86452	0	NA	0	0	0.373901	-0.79621	0	0.373901	-0.86452	0	0.495025	0.79621	0	0.373901	0.79621	0	0.942804	-0.0683095	0	0.495025	0.86452	0
57	2-Hexaprenyl-3-methyl-6-methoxy-1,4-benzoquinone	C38H56O3	-	559.416	-9.4	12.54	0.47	1	-	-	-	-	35101	-	-	-	-	-	-	0.495025	-0.877116	0	NA	0	0	NA	0	0	0.495025	0.877116	0	0.373901	0.877116	0	0.373901	0.877116	0	NA	0	0	0.373901	-0.877116	0	NA	0	0	NA	0	0
58	2-Hydroxy-3-(4-hydroxyphenyl)propenoate	C9H8O4	-	179.035	-1	2.66	0.93	0	-	-	-	-	-	-	-	-	-	-	-	NA	0	0	NA	0	0	NA	0	0	NA	0	0	NA	0	0	NA	0	0	NA	0	0	NA	0	0	NA	0	0	NA	0	0
59	2-Hydroxy-3-oxopropanoate	C3H4O4	-	103.004	-14.4	12.98	0.14	9	2702116	2925160	17533158	16925484	15791513	-	187589	538280	-	399861	310898	0.000236689	-2.57366	246031	0.000210808	3.23368	69448	0.000704064	3.20958	20483	0.000236689	2.57366	246031	5.68526e-06	5.80733	83966119	6.1242e-06	5.78324	76679871	0.000210808	-3.23368	69448	5.68526e-06	-5.80733	83966119	0.971478	-0.0240908	0	0.000704064	-3.20958	20483
60	2-Hydroxy-3-phenylpropenoate	C9H8O3	+	165.055	-4.4	9.61	0.7	11	6940448	6644039	8894822	9934330	10334454	1575385	723132	804450	19211	192771	17380	0.0139219	-0.517247	849	1.73247e-05	6.47315	17611268	0.000565354	2.7152	45455	0.0139219	0.517247	849	2.40407e-05	6.9904	25909803	6.84627e-05	3.23245	738263	1.73247e-05	-6.47315	17611268	2.40407e-05	-6.9904	25909803	0.0260733	-3.75795	288	0.000565354	-2.7152	45455
61	2-Hydroxybutanoic acid	C4H8O3	-	103.04	-12.3	0.08	0.08	0	-	-	-	-	-	-	-	-	-	-	-	NA	0	0	NA	0	0	NA	0	0	NA	0	0	NA	0	0	NA	0	0	NA	0	0	NA	0	0	NA	0	0	NA	0	0
62	2-Methyl-1-hydroxybutyl-ThPP	C17H29N4O8P2S	+	512.125	9.9	6.89	0.49	1	-	-	13746	-	-	-	-	-	-	-	-	0.495025	-0.126568	0	NA	0	0	NA	0	0	0.495025	0.126568	0	0.373901	0.126568	0	0.373901	0.126568	0	NA	0	0	0.373901	-0.126568	0	NA	0	0	NA	0	0
63	2-Methyl-1-hydroxypropyl-ThPP	C16H27N4O8P2S	+	498.11	-6.7	7.12	0.31	0	-	-	-	-	-	-	-	-	-	-	-	NA	0	0	NA	0	0	NA	0	0	NA	0	0	NA	0	0	NA	0	0	NA	0	0	NA	0	0	NA	0	0	NA	0	0
64	2-Methylacetoacetyl-CoA	C26H42N7O18P3S	+	866.159	-10.2	11.18	0.47	1	-	-	-	-	-	-	-	28941	-	-	-	NA	0	0	NA	0	0	0.495025	-0.706081	0	NA	0	0	NA	0	0	0.373901	-0.706081	0	NA	0	0	NA	0	0	0.373901	-0.706081	0	0.495025	0.706081	0
65	2-Methylbut-2-enoyl-CoA	C26H42N7O17P3S	+	850.164	-12.9	11.75	0.37	2	39135	-	-	-	-	-	-	20288	-	-	-	0.272228	1.01929	0	0.272228	1.01929	0	0.377358	0.763026	0	0.272228	-1.01929	0	NA	0	0	0.373901	-0.256264	0	0.272228	-1.01929	0	NA	0	0	0.373901	-0.256264	0	0.377358	-0.763026	0
66	2-Methylprop-2-enoyl-CoA	C25H40N7O17P3S	+	836.149	7.8	12.38	0.87	1	-	-	26104	-	-	-	-	-	-	-	-	0.495025	-0.619929	0	NA	0	0	NA	0	0	0.495025	0.619929	0	0.373901	0.619929	0	0.373901	0.619929	0	NA	0	0	0.373901	-0.619929	0	NA	0	0	NA	0	0
67	2-Methylpropanoyl-CoA	C25H42N7O17P3S	+	838.164	-5.5	9.9	0.32	2	-	-	12263	-	43797	-	-	-	-	-	-	0.456085	-1.13881	0	NA	0	0	NA	0	0	0.456085	1.13881	0	0.332335	1.13881	0	0.332335	1.13881	0	NA	0	0	0.332335	-1.13881	0	NA	0	0	NA	0	0
68	2-Oxoadipate	C6H8O5	-	159.03	2.5	3.43	0.93	0	-	-	-	-	-	-	-	-	-	-	-	NA	0	0	NA	0	0	NA	0	0	NA	0	0	NA	0	0	NA	0	0	NA	0	0	NA	0	0	NA	0	0	NA	0	0
69	2-Oxobutanoate	C4H6O3	-	101.024	-15	11.22	0.8	9	287811	290500	4942090	1720178	2267635	117267	-	-	126888	240923	125865	0.127603	-3.36376	132	0.0856429	0.813244	5	5.23428e-06	1.34286	97684	0.127603	3.36376	132	0.0476766	4.17701	596	0.0451949	4.70662	893	0.0856429	-0.813244	5	0.0476766	-4.17701	596	0.256401	0.529615	1	5.23428e-06	-1.34286	97684
70	2-Oxoglutarate	C5H6O5	-	145.014	-10.7	12.79	0.7	6	5074472	4723452	188225	92604	190686	-	-	114353	-	-	-	5.33753e-05	4.96206	1476312	4.4177e-05	5.82457	3197741	4.49957e-05	5.67711	2839802	5.33753e-05	-4.96206	1476312	0.0936631	0.862503	2	0.141582	0.715042	1	4.4177e-05	-5.82457	3197741	0.0936631	-0.862503	2	0.373901	-0.147461	0	4.49957e-05	-5.67711	2839802
71	2-Phenylacetamide	C8H9NO	+	136.076	-3.6	9.61	0.6	9	5654868	5517882	7027800	7979956	8163104	1370723	621729	724928	-	139569	-	0.0184862	-0.467365	498	3.94861e-06	6.26925	55269035	0.000611838	2.62466	32721	0.0184862	0.467365	498	2.69555e-05	6.73661	15421269	8.65116e-05	3.09202	425274	3.94861e-06	-6.26925	55269035	2.69555e-05	-6.73661	15421269	0.0244521	-3.64459	250	0.000611838	-2.62466	32721
72	2-Phospho-D-glycerate	C3H7O7P	-	184.986	-7.9	14.19	0.48	5	85485	136160	123884	261800	365484	-	-	-	-	-	-	0.227671	-1.17592	2	0.15412	0.563269	1	0.15412	0.563269	1	0.227671	1.17592	2	0.0663134	1.73919	8	0.0663134	1.73919	8	0.15412	-0.563269	1	0.0663134	-1.73919	8	NA	0	0	0.15412	-0.563269	1
73	2-trans-Dodecenoyl-CoA	C33H52N7O17P3S	+	944.243	-9.5	12.14	0.9	2	-	-	119604	-	14367	-	-	-	-	-	-	0.480461	-2.05317	0	NA	0	0	NA	0	0	0.480461	2.05317	0	0.358186	2.05317	0	0.358186	2.05317	0	NA	0	0	0.358186	-2.05317	0	NA	0	0	NA	0	0
74	3-(4-Hydroxyphenyl)pyruvate	C9H8O4	-	179.035	-1	2.66	0.93	0	-	-	-	-	-	-	-	-	-	-	-	NA	0	0	NA	0	0	NA	0	0	NA	0	0	NA	0	0	NA	0	0	NA	0	0	NA	0	0	NA	0	0	NA	0	0
75	3,4-Dihydroxymandelaldehyde	C8H8O4	-	167.035	-5.3	8.24	0.91	2	408492	375357	-	-	-	-	-	-	-	-	-	0.000356236	1.23948	1849	0.000356236	1.23948	1849	0.000356236	1.23948	1849	0.000356236	-1.23948	1849	NA	0	0	NA	0	0	0.000356236	-1.23948	1849	NA	0	0	NA	0	0	0.000356236	-1.23948	1849
76	3,4-Dihydroxyphenylethyleneglycol	C8H10O4	-	169.051	1.6	2.71	0.72	0	-	-	-	-	-	-	-	-	-	-	-	NA	0	0	NA	0	0	NA	0	0	NA	0	0	NA	0	0	NA	0	0	NA	0	0	NA	0	0	NA	0	0	NA	0	0
77	3',5'-Cyclic AMP	C10H12N5O6P	-	328.045	-8.1	7.12	0.33	5	-	42751	68634	25299	106675	30340	-	-	-	-	-	0.303791	-1.34215	0	0.272228	1.3992	0	0.568345	0.652456	0	0.303791	1.34215	0	0.0728284	2.74134	4	0.110027	1.9946	2	0.272228	-1.3992	0	0.0728284	-2.74134	4	0.373901	-0.746743	0	0.568345	-0.652456	0
78	3',5'-Cyclic GMP	C10H12N5O7P	+	346.055	-10.7	7.12	0.29	5	22111	-	43179	32781	25633	-	-	15363	-	-	-	0.11171	-1.0767	0	0.272228	0.683068	0	0.461664	0.445789	0	0.11171	1.0767	0	0.00941394	1.75977	8	0.0149829	1.52249	4	0.272228	-0.683068	0	0.00941394	-1.75977	8	0.373901	-0.237278	0	0.461664	-0.445789	0
79	3-Aminopropanal	C3H7NO	+	74.06	6.2	6.57	0.71	0	-	-	-	-	-	-	-	-	-	-	-	NA	0	0	NA	0	0	NA	0	0	NA	0	0	NA	0	0	NA	0	0	NA	0	0	NA	0	0	NA	0	0	NA	0	0
80	3-Dehydrosphinganine	C18H37NO2	+	300.29	-4.7	2.92	0.1	9	21626274	-	33528740	28386660	31079134	41595200	23709160	42270892	32345324	-	31628806	0.0151371	-0.544482	2517	0.238795	-0.412334	138	0.159799	-0.75461	301	0.0151371	0.544482	2517	0.534227	0.132148	61	0.480639	-0.210128	80	0.238795	0.412334	138	0.534227	-0.132148	61	0.347392	-0.342277	117	0.159799	0.75461	301
81	3-Hydroxy-2,6-dimethyl-5-methylene-heptanoyl-CoA	C31H52N7O18P3S	+	936.237	-4.2	15.42	0.69	1	-	-	-	-	-	18332	-	-	-	-	-	NA	0	0	NA	0	0	0.495025	-0.302104	0	NA	0	0	NA	0	0	0.373901	-0.302104	0	NA	0	0	NA	0	0	0.373901	-0.302104	0	0.495025	0.302104	0
82	3-Hydroxyanthranilate	C7H7NO3	-	152.035	13.7	4.26	0.46	8	-	-	226794	481569	763923	125644	-	135127	186761	204055	171074	0.156462	-2.10645	8	0.00943146	-0.716753	26	0.259914	-0.132334	1	0.156462	2.10645	8	0.122591	1.3897	7	0.077951	1.97412	16	0.00943146	0.716753	26	0.122591	-1.3897	7	0.00529214	0.584419	44	0.259914	0.132334	1
83	3-Hydroxyisovaleryl-CoA	C26H44N7O18P3S	+	868.175	-15	9.73	0.43	1	14811	-	-	-	-	-	-	-	-	-	-	0.272228	0.24265	0	0.272228	0.24265	0	0.272228	0.24265	0	0.272228	-0.24265	0	NA	0	0	NA	0	0	0.272228	-0.24265	0	NA	0	0	NA	0	0	0.272228	-0.24265	0
84	3-Hydroxy-L-kynurenine	C10H12N2O4	-	223.072	-1.5	1.97	0.94	0	-	-	-	-	-	-	-	-	-	-	-	NA	0	0	NA	0	0	NA	0	0	NA	0	0	NA	0	0	NA	0	0	NA	0	0	NA	0	0	NA	0	0	NA	0	0
85	3-Hydroxypropanoate	C3H6O3	-	89.0244	-14.8	0.01	0.3	2	-	2890231	-	-	-	-	-	-	-	3351583	-	0.272228	0.127526	10	0.865636	-0.0419573	3	0.272228	0.127526	10	0.272228	-0.127526	10	0.373901	-0.169483	8	NA	0	0	0.865636	0.0419573	3	0.373901	0.169483	8	0.373901	0.169483	8	0.272228	-0.127526	10
86	3-Hydroxypropionyl-CoA	C24H40N7O18P3S	+	840.144	9.9	10.86	0.29	2	44365	-	-	-	-	11732	-	-	-	-	-	0.272228	1.44268	0	0.272228	1.44268	0	0.286166	1.3617	0	0.272228	-1.44268	0	NA	0	0	0.373901	-0.080976	0	0.272228	-1.44268	0	NA	0	0	0.373901	-0.080976	0	0.286166	-1.3617	0
87	3-Isopropylmalate	C7H12O5	-	175.061	0.6	5.2	0.61	0	-	-	-	-	-	-	-	-	-	-	-	NA	0	0	NA	0	0	NA	0	0	NA	0	0	NA	0	0	NA	0	0	NA	0	0	NA	0	0	NA	0	0	NA	0	0
88	3-Mercaptolactate	C3H6O3S	-	120.996	5.1	6.35	0.83	10	31029	25200	47884	28477	-	30151	28120	27230	112281	118027	220266	0.615459	-0.253335	0	0.0742421	-2.41742	6	0.884503	-0.0196644	0	0.615459	0.253335	0	0.0311752	-2.16408	13	0.532498	0.23367	0	0.0742421	2.41742	6	0.0311752	2.16408	13	0.0256246	2.39775	18	0.884503	0.0196644	0
89	3-Methyl-1-hydroxybutyl-ThPP	C17H29N4O8P2S	+	512.125	9.9	6.89	0.49	1	-	-	13746	-	-	-	-	-	-	-	-	0.495025	-0.126568	0	NA	0	0	NA	0	0	0.495025	0.126568	0	0.373901	0.126568	0	0.373901	0.126568	0	NA	0	0	0.373901	-0.126568	0	NA	0	0	NA	0	0
90	3-Methyl-2-oxobutanoic acid	C5H8O3	+	117.055	11.8	3.01	0.1	11	1037949	1288291	1872508	2565585	630249	2461147	2367177	3113934	5699349	5662899	4133210	0.526583	-0.538551	4	0.00949933	-2.15081	1479	0.0184384	-1.18659	235	0.526583	0.538551	4	0.01052	-1.61226	996	0.193088	-0.648035	18	0.00949933	2.15081	1479	0.01052	1.61226	996	0.0113296	0.964224	673	0.0184384	1.18659	235
91	3-Methylbutanoyl-CoA	C26H44N7O17P3S	+	852.18	-4.2	16.44	0.52	1	-	-	-	-	16503	-	-	-	-	-	-	0.495025	-0.224223	0	NA	0	0	NA	0	0	0.495025	0.224223	0	0.373901	0.224223	0	0.373901	0.224223	0	NA	0	0	0.373901	-0.224223	0	NA	0	0	NA	0	0
92	3-Methylcrotonyl-CoA	C26H42N7O17P3S	+	850.164	-12.9	11.75	0.37	2	39135	-	-	-	-	-	-	20288	-	-	-	0.272228	1.01929	0	0.272228	1.01929	0	0.377358	0.763026	0	0.272228	-1.01929	0	NA	0	0	0.373901	-0.256264	0	0.272228	-1.01929	0	NA	0	0	0.373901	-0.256264	0	0.377358	-0.763026	0
93	3-Methylglutaconyl-CoA	C27H42N7O19P3S	+	894.154	4.8	15.51	0.83	1	-	-	-	-	-	-	-	41264	-	-	-	NA	0	0	NA	0	0	0.495025	-0.870913	0	NA	0	0	NA	0	0	0.373901	-0.870913	0	NA	0	0	NA	0	0	0.373901	-0.870913	0	0.495025	0.870913	0
94	3-Oxodecanoyl-CoA	C31H52N7O18P3S	+	936.237	-4.2	15.42	0.69	1	-	-	-	-	-	18332	-	-	-	-	-	NA	0	0	NA	0	0	0.495025	-0.302104	0	NA	0	0	NA	0	0	0.373901	-0.302104	0	NA	0	0	NA	0	0	0.373901	-0.302104	0	0.495025	0.302104	0
95	3-Oxododecanoyl-CoA	C33H56N7O18P3S	+	964.269	-9.6	20.86	0.31	0	-	-	-	-	-	-	-	-	-	-	-	NA	0	0	NA	0	0	NA	0	0	NA	0	0	NA	0	0	NA	0	0	NA	0	0	NA	0	0	NA	0	0	NA	0	0
96	3-Oxohexanoyl-CoA	C27H44N7O18P3S	+	880.175	-12.5	20.36	0.62	1	-	33447	-	-	-	-	-	-	-	-	-	0.272228	1.04854	0	0.272228	1.04854	0	0.272228	1.04854	0	0.272228	-1.04854	0	NA	0	0	NA	0	0	0.272228	-1.04854	0	NA	0	0	NA	0	0	0.272228	-1.04854	0
97	3-Oxooctanoyl-CoA	C29H48N7O18P3S	+	908.206	6.6	26.12	0.72	2	-	-	-	-	-	-	-	-	15415	-	12921	NA	0	0	0.357401	-0.159902	0	NA	0	0	NA	0	0	0.233969	-0.159902	0	NA	0	0	0.357401	0.159902	0	0.233969	0.159902	0	0.233969	0.159902	0	NA	0	0
98	3-Oxopropanoate	C3H4O3	-	87.0088	-14.6	11.09	0.69	2	339583	-	651299	-	-	-	-	-	-	-	-	0.60124	-0.382218	1	0.272228	0.146125	1	0.272228	0.146125	1	0.60124	0.382218	1	0.373901	0.528343	1	0.373901	0.528343	1	0.272228	-0.146125	1	0.373901	-0.528343	1	NA	0	0	0.272228	-0.146125	1
99	3-Oxotetradecanoyl-CoA	C35H60N7O18P3S	+	992.3	-9.9	12.93	0.34	0	-	-	-	-	-	-	-	-	-	-	-	NA	0	0	NA	0	0	NA	0	0	NA	0	0	NA	0	0	NA	0	0	NA	0	0	NA	0	0	NA	0	0	NA	0	0
100	3'-Phosphoadenylyl sulfate	C10H15N5O13P2S	-	505.979	11.2	13.75	0.41	6	56492	57584	65643	116205	325539	-	-	35622	-	-	-	0.354918	-1.56813	1	5.91429e-06	1.03928	14732	0.00435805	0.908991	19	0.354918	1.56813	1	0.150195	2.60741	4	0.15626	2.47712	4	5.91429e-06	-1.03928	14732	0.150195	-2.60741	4	0.373901	-0.130288	0	0.00435805	-0.908991	19
101	3-Phospho-D-glyceroyl phosphate	C3H8O10P2	+	266.966	13.3	3.21	0.01	0	-	-	-	-	-	-	-	-	-	-	-	NA	0	0	NA	0	0	NA	0	0	NA	0	0	NA	0	0	NA	0	0	NA	0	0	NA	0	0	NA	0	0	NA	0	0
102	3-Phosphonooxypyruvate	C3H5O7P	+	184.985	5	8.49	0.75	1	-	-	-	-	30044	-	-	-	-	-	-	0.495025	-0.325057	0	NA	0	0	NA	0	0	0.495025	0.325057	0	0.373901	0.325057	0	0.373901	0.325057	0	NA	0	0	0.373901	-0.325057	0	NA	0	0	NA	0	0
103	3-Sulfino-L-alanine	C3H7NO4S	-	152.002	-7.9	11.59	0.17	8	34159	24492	82544	22315	65779	20475	15874	17229	-	-	-	0.324729	-0.955749	0	0.0126801	1.55216	5	0.0646322	0.715477	1	0.324729	0.955749	0	0.0592893	2.5079	3	0.0960339	1.67123	1	0.0126801	-1.55216	5	0.0592893	-2.5079	3	0.00451414	-0.836678	6	0.0646322	-0.715477	1
104	3-Sulfinylpyruvate	C3H3O5S	+	151.977	-7.9	9.9	0.6	1	-	-	-	-	39150	-	-	-	-	-	-	0.495025	-0.91477	0	NA	0	0	NA	0	0	0.495025	0.91477	0	0.373901	0.91477	0	0.373901	0.91477	0	NA	0	0	0.373901	-0.91477	0	NA	0	0	NA	0	0
105	3-Sulfopyruvate	C3H4O6S	+	168.98	14.6	26.1	0.42	6	-	-	-	-	-	24959	21385	21751	11806	21513	13413	NA	0	0	0.299245	-0.538942	0	0.00383331	-1.08208	9	NA	0	0	0.181287	-0.538942	0	0.000456656	-1.08208	77	0.299245	0.538942	0	0.181287	0.538942	0	0.0908621	-0.543138	0	0.00383331	1.08208	9
106	4-(2-Amino-3-hydroxyphenyl)-2,4-dioxobutanoate	C10H9NO5	+	224.055	6.9	9.15	0.86	4	165445	166696	-	12862	22888	-	-	-	-	-	-	5.91535e-05	3.37843	16002	6.1292e-08	3.77188	19860514	6.1292e-08	3.77188	19860514	5.91535e-05	-3.37843	16002	0.333113	0.393442	0	0.333113	0.393442	0	6.1292e-08	-3.77188	19860514	0.333113	-0.393442	0	NA	0	0	6.1292e-08	-3.77188	19860514
107	4-(2-Aminophenyl)-2,4-dioxobutanoate	C10H9NO4	+	208.06	6.6	3.09	0.2	11	793648	651490	2339209	1308404	1204350	829090	1332293	1379288	599033	442635	844742	0.153422	-1.1624	17	0.599249	0.200526	1	0.144764	-0.707853	11	0.153422	1.1624	17	0.0602341	1.36293	48	0.338807	0.454546	6	0.599249	-0.200526	1	0.0602341	-1.36293	48	0.0595433	-0.90838	29	0.144764	0.707853	11
108	4-Acetamidobutanoate	C6H11NO3	+	146.081	-3.2	6.65	0.74	11	2562279	3133897	6605746	8514018	11703088	1261092	954556	966503	1379227	1535108	1440543	0.0510781	-1.65043	362	0.00800396	0.972324	527	0.00558708	1.42495	939	0.0510781	1.65043	362	0.00730977	2.62276	4378	0.00613744	3.07539	6868	0.00800396	-0.972324	527	0.00730977	-2.62276	4378	0.0237351	0.45263	72	0.00558708	-1.42495	939
109	4-Aminobenzoate	C7H7NO2	+	138.055	-4	8.56	0.28	7	2240347	2521030	9267107	11645257	14221273	50707	52682	-	-	-	-	0.0150254	-2.29844	2307	0.000196227	5.78369	340244	0.000198024	5.60634	298852	0.0150254	2.29844	2307	0.0012298	8.08213	1295090	0.00123208	7.90478	1143713	0.000196227	-5.78369	340244	0.0012298	-8.08213	1295090	0.121484	-0.177346	0	0.000198024	-5.60634	298852
110	4-Aminobutanoate	C4H9NO2	+	104.071	0.9	11.86	0.49	8	18408880	21177804	80214072	88426152	94042976	7534082	5471098	7764243	-	-	-	0.00102389	-2.14527	231914	0.000458954	3.01203	195516	0.00270331	1.51552	14128	0.00102389	2.14527	231914	2.92947e-05	5.15731	54827351	3.87001e-05	3.66079	15439213	0.000458954	-3.01203	195516	2.92947e-05	-5.15731	54827351	0.00358748	-1.49651	3687	0.00270331	-1.51552	14128
111	4-Aminobutyraldehyde	C4H9NO	+	88.0757	2.4	8.24	0.11	11	754708608	824346048	1153813376	1207278336	918246912	201061968	203226368	435823712	558335168	597104064	507338912	0.0815515	-0.469381	15981	0.0115587	0.510428	82803	0.0162162	1.49537	92978	0.0815515	0.469381	15981	0.00432705	0.979809	375424	0.00233373	1.96475	1148381	0.0115587	-0.510428	82803	0.00432705	-0.979809	375424	0.0288529	0.984942	28615	0.0162162	-1.49537	92978
112	4-Methyl-2-oxopentanoate	C6H10O3	-	129.056	-10.2	3.49	0.51	10	3758418	2937493	456139	365063	386203	236534	150075	159040	147606	141323	-	0.0024255	3.05633	6431	0.00184575	4.67609	24093	0.00196291	4.2022	16551	0.0024255	-3.05633	6431	0.000903495	1.61975	907	0.00475654	1.14586	136	0.00184575	-4.67609	24093	0.000903495	-1.61975	907	0.171893	-0.47389	1	0.00196291	-4.2022	16551
113	4-Nitrophenol	C6H5NO3	-	138.02	-12.1	0.88	0.95	0	-	-	-	-	-	-	-	-	-	-	-	NA	0	0	NA	0	0	NA	0	0	NA	0	0	NA	0	0	NA	0	0	NA	0	0	NA	0	0	NA	0	0	NA	0	0
114	4-Phospho-L-aspartate	C4H8NO7P	+	214.011	11.6	12.42	0.26	3	-	119901	-	13441	-	-	-	-	-	21539	-	0.275223	2.38816	1	0.297445	2.10848	1	0.272228	2.43599	1	0.275223	-2.38816	1	0.438168	-0.279682	0	0.373901	0.0478337	0	0.297445	-2.10848	1	0.438168	0.279682	0	0.373901	0.327516	0	0.272228	-2.43599	1
115	4-Trimethylammoniobutanal	C7H16NO	+	131.131	2.5	13.28	0.42	6	15797	11217	27653	45391	28260	-	-	-	-	11333	-	0.0781838	-1.32195	1	0.18753	0.370987	0	0.132173	0.433707	0	0.0781838	1.32195	1	0.0161317	1.69294	4	0.0150001	1.75566	5	0.18753	-0.370987	0	0.0161317	-1.69294	4	0.373901	0.0627204	0	0.132173	-0.433707	0
116	4-Trimethylammoniobutanoate	C7H16NO2	+	147.125	7.6	11.59	0.3	6	45064	131759	160109	182052	106534	-	-	-	-	10744	-	0.253455	-0.758467	1	0.0942444	3.10889	5	0.0935891	3.14423	5	0.253455	0.758467	1	0.00341896	3.86736	341	0.00339585	3.9027	351	0.0942444	-3.10889	5	0.00341896	-3.86736	341	0.373901	0.0353424	0	0.0935891	-3.14423	5
117	5(S)-Hydroperoxy-6-trans-8,11,14-cis-eicosatetraenoic acid	C20H32O4	+	337.237	-10.2	2.85	0.45	10	73767	86631	59277	207457	165580	107570	142868	225447	45330	171533	-	0.344866	-0.845461	1	0.981322	0.0281283	0	0.182152	-0.983994	1	0.344866	0.845461	1	0.367545	0.873589	1	0.809024	-0.138533	0	0.981322	-0.0281283	0	0.367545	-0.873589	1	0.244056	-1.01212	1	0.182152	0.983994	1
118	5,10-Methenyltetrahydrofolate	C20H21N7O6	+	456.163	9.8	8.39	0.45	5	57816	46349	42091	39396	64251	-	-	-	-	-	-	0.771558	0.100456	0	0.00240147	2.23362	62	0.00240147	2.23362	62	0.771558	-0.100456	0	0.0088858	2.13317	15	0.0088858	2.13317	15	0.00240147	-2.23362	62	0.0088858	-2.13317	15	NA	0	0	0.00240147	-2.23362	62
119	5,10-Methylenetetrahydrofolate	C20H23N7O6	+	458.178	13.6	11.51	0.17	4	42089	44803	41473	37909	-	-	-	-	-	-	-	0.367132	0.544202	0	6.07912e-05	2.11922	1910	6.07912e-05	2.11922	1910	0.367132	-0.544202	0	0.117547	1.57502	1	0.117547	1.57502	1	6.07912e-05	-2.11922	1910	0.117547	-1.57502	1	NA	0	0	6.07912e-05	-2.11922	1910
120	5,6-EET	C20H32O3	-	319.228	-9.6	3.18	0.52	11	57240	40861	174637	86955	296592	123691	159606	85654	162432	75175	270441	0.180113	-1.92344	2	0.198672	-1.78766	2	0.0790841	-1.32613	3	0.180113	1.92344	2	0.8502	0.135776	0	0.382985	0.597312	1	0.198672	1.78766	2	0.8502	-0.135776	0	0.485341	0.461536	0	0.0790841	1.32613	3
121	5-Amino-4-imidazolecarboxyamide	C4H6N4O	-	125.047	-9.5	1.31	1	0	-	-	-	-	-	-	-	-	-	-	-	NA	0	0	NA	0	0	NA	0	0	NA	0	0	NA	0	0	NA	0	0	NA	0	0	NA	0	0	NA	0	0	NA	0	0
122	5-Amino-6-(5'-phospho-D-ribitylamino)uracil	C9H17N4O9P	+	357.081	12.1	5.92	0.12	1	-	-	-	-	-	-	-	-	-	17240	-	NA	0	0	0.495025	-0.311891	0	NA	0	0	NA	0	0	0.373901	-0.311891	0	NA	0	0	0.495025	0.311891	0	0.373901	0.311891	0	0.373901	0.311891	0	NA	0	0
123	5-Amino-6-(D-ribitylamino)uracil	C9H16N4O6	+	277.114	-5.3	3.52	0.23	8	16315	22400	56880	67090	40375	-	23343	-	-	35552	38270	0.0412642	-1.5008	3	0.409482	-0.592376	0	0.643279	0.192629	0	0.0412642	1.5008	3	0.0804144	0.908425	1	0.010851	1.69343	11	0.409482	0.592376	0	0.0804144	-0.908425	1	0.218539	0.785005	0	0.643279	-0.192629	0
124	5-Aminolevulinate	C5H9NO3	+	132.065	-3.2	10.87	0.29	9	464184416	495949504	52545432	55990288	54523484	13866190	12253689	11612597	-	24534990	-	4.81304e-05	3.1428	49035573	7.35637e-05	5.60298	161851907	3.60141e-05	5.25432	261059188	4.81304e-05	-3.1428	49035573	0.00385167	2.46018	45883	4.09423e-06	2.11152	35322546	7.35637e-05	-5.60298	161851907	0.00385167	-2.46018	45883	0.732276	-0.348659	20	3.60141e-05	-5.25432	261059188
125	5'-Deoxyadenosine	C10H13N5O3	+	252.109	-4.4	5.28	0.91	5	156811	222404	2388025	3308136	922192	-	-	-	-	-	-	0.110197	-3.54042	126	0.00730398	2.65883	95	0.00730398	2.65883	95	0.110197	3.54042	126	0.0351096	6.19925	2340	0.0351096	6.19925	2340	0.00730398	-2.65883	95	0.0351096	-6.19925	2340	NA	0	0	0.00730398	-2.65883	95
126	5-Hydroxyeicosatetraenoate	C20H32O3	-	319.228	-9.6	3.18	0.52	11	57240	40861	174637	86955	296592	123691	159606	85654	162432	75175	270441	0.180113	-1.92344	2	0.198672	-1.78766	2	0.0790841	-1.32613	3	0.180113	1.92344	2	0.8502	0.135776	0	0.382985	0.597312	1	0.198672	1.78766	2	0.8502	-0.135776	0	0.485341	0.461536	0	0.0790841	1.32613	3
127	5-Hydroxyindoleacetaldehyde	C10H9NO2	+	176.071	-2.9	3.34	0.55	11	664430	855483	2218352	2638773	3553474	868322	741884	1036709	1044497	705922	807570	0.0284223	-1.88326	231	0.574937	-0.166059	2	0.419971	-0.215361	2	0.0284223	1.88326	231	0.00866716	1.7172	694	0.00887809	1.6679	660	0.574937	0.166059	2	0.00866716	-1.7172	694	0.832994	-0.0493018	1	0.419971	0.215361	2
128	5-Hydroxyindoleacetate	C10H9NO3	+	192.065	15	4.15	0.57	8	156537	168954	235449	187051	182889	96026	51253	24650	-	-	-	0.177712	-0.310282	1	6.112e-05	4.02455	22999	0.0306349	1.50577	10	0.177712	0.310282	1	0.000341266	4.33483	6262	0.00572596	1.81605	80	6.112e-05	-4.02455	22999	0.000341266	-4.33483	6262	0.0855685	-2.51878	2	0.0306349	-1.50577	10
129	5-Hydroxy-L-tryptophan	C11H12N2O3	+	221.092	-8	7.55	0.43	6	77716	166126	38841	41422	220624	-	-	11091	-	-	-	0.814293	0.281687	0	0.0433241	3.49744	17	0.0434207	3.48434	17	0.814293	-0.281687	0	0.211099	3.21576	2	0.211508	3.20265	2	0.0433241	-3.49744	17	0.211099	-3.21576	2	0.373901	-0.0131037	0	0.0434207	-3.48434	17
130	5-Hydroxy-N-formylkynurenine	C11H12N2O5	-	251.067	3.4	0.71	0.7	0	-	-	-	-	-	-	-	-	-	-	-	NA	0	0	NA	0	0	NA	0	0	NA	0	0	NA	0	0	NA	0	0	NA	0	0	NA	0	0	NA	0	0	NA	0	0
131	5-Methyltetrahydrofolate	C20H25N7O6	-	458.179	-1.6	1.79	0.48	3	-	-	37126	-	28728	-	-	-	-	29814	-	0.34455	-0.263115	0	0.495025	-0.082787	0	NA	0	0	0.34455	0.263115	0	0.401918	0.180328	0	0.221967	0.263115	0	0.495025	0.082787	0	0.401918	-0.180328	0	0.373901	0.082787	0	NA	0	0
132	5'-Methylthioadenosine	C11H15N5O3S	+	298.097	-7.8	4.27	0.3	8	239033	140283	516660	577958	656190	28865	20640	19829	-	-	-	0.00855555	-1.62159	139	0.0174776	3.75836	79	0.0204603	3.03673	43	0.00855555	1.62159	139	0.000146575	5.37994	84890	0.000157729	4.65831	48566	0.0174776	-3.75836	79	0.000146575	-5.37994	84890	0.034464	-0.721629	1	0.0204603	-3.03673	43
133	5-Phospho-alpha-D-ribose 1-diphosphate	C5H13O14P3	+	390.959	-5.6	6.99	0.2	0	-	-	-	-	-	-	-	-	-	-	-	NA	0	0	NA	0	0	NA	0	0	NA	0	0	NA	0	0	NA	0	0	NA	0	0	NA	0	0	NA	0	0	NA	0	0
134	5-Phosphoribosylamine	C5H12NO7P	+	230.042	-1.8	9.91	0.54	7	123924	117363	191629	105379	127048	12523	-	-	13337	-	-	0.580573	-0.228542	0	3.11422e-05	3.35047	21694	2.72459e-05	3.38395	25326	0.580573	0.228542	0	0.00750196	3.57901	122	0.00744004	3.6125	126	3.11422e-05	-3.35047	21694	0.00750196	-3.57901	122	0.777104	0.0334808	0	2.72459e-05	-3.38395	25326
135	5'-Phosphoribosylglycinamide	C7H15N2O8P	+	287.064	11.2	11.6	0.34	1	-	-	-	-	35650	-	-	-	-	-	-	0.495025	-0.809127	0	NA	0	0	NA	0	0	0.495025	0.809127	0	0.373901	0.809127	0	0.373901	0.809127	0	NA	0	0	0.373901	-0.809127	0	NA	0	0	NA	0	0
136	5'-Phosphoribosyl-N-formylglycinamide	C8H15N2O9P	+	315.059	-8.5	12.22	0.36	2	-	11575	-	15640	-	-	-	-	-	-	-	0.691318	-0.139174	0	0.272228	0.109361	0	0.272228	0.109361	0	0.691318	0.139174	0	0.373901	0.248535	0	0.373901	0.248535	0	0.272228	-0.109361	0	0.373901	-0.248535	0	NA	0	0	0.272228	-0.109361	0
137	6,7-Dimethyl-8-(D-ribityl)lumazine	C13H18N4O6	-	325.115	-10.9	10.89	0.94	5	336892	321145	296531	438999	284664	-	-	-	-	-	-	0.874504	-0.0476404	0	2.60186e-05	2.20433	35462	2.60186e-05	2.20433	35462	0.874504	0.0476404	0	0.00562315	2.25197	174	0.00562315	2.25197	174	2.60186e-05	-2.20433	35462	0.00562315	-2.25197	174	NA	0	0	2.60186e-05	-2.20433	35462
138	6-Hydroxymelatonin	C13H16N2O3	+	249.123	-5.5	3.51	0.48	11	45861	37256	230493	84380	221632	70084	61846	33038	56899	95997	131991	0.110435	-2.10541	4	0.154337	-1.19221	1	0.4324	-0.404008	0	0.110435	2.10541	4	0.182256	0.913202	1	0.0634634	1.70141	6	0.154337	1.19221	1	0.182256	-0.913202	1	0.17698	0.788204	1	0.4324	0.404008	0
139	6-Phospho-D-gluconate	C6H13O10P	-	275.017	-8.2	3.18	0.41	5	-	40216	57698	193278	470543	-	-	-	51201	-	-	0.264281	-3.25986	5	0.951946	0.0812121	0	0.272228	1.32815	0	0.264281	3.25986	5	0.150925	3.34107	9	0.130653	4.588	23	0.951946	-0.0812121	0	0.150925	-3.34107	9	0.373901	1.24694	0	0.272228	-1.32815	0
140	6-Pyruvoyltetrahydropterin	C9H11N5O3	-	236.079	-8.1	7.64	0.25	0	-	-	-	-	-	-	-	-	-	-	-	NA	0	0	NA	0	0	NA	0	0	NA	0	0	NA	0	0	NA	0	0	NA	0	0	NA	0	0	NA	0	0	NA	0	0
141	8,9-EET	C20H32O3	-	319.228	-9.6	3.18	0.52	11	57240	40861	174637	86955	296592	123691	159606	85654	162432	75175	270441	0.180113	-1.92344	2	0.198672	-1.78766	2	0.0790841	-1.32613	3	0.180113	1.92344	2	0.8502	0.135776	0	0.382985	0.597312	1	0.198672	1.78766	2	0.8502	-0.135776	0	0.485341	0.461536	0	0.0790841	1.32613	3
142	9(10)-EpOME	C18H32O3	-	295.228	-4.6	2.88	0.46	11	4381895	6323732	4957707	9168192	14619672	10108219	4904268	5279747	13387500	9252820	17862198	0.334063	-0.840008	40	0.0895352	-1.33468	266	0.579915	-0.337596	13	0.334063	0.840008	40	0.354068	-0.494672	46	0.436194	0.502412	27	0.0895352	1.33468	266	0.354068	0.494672	46	0.0879233	0.997084	230	0.579915	0.337596	13
143	Acetoacetyl-CoA	C25H40N7O18P3S	+	852.144	-10	27.67	0.84	1	-	-	33595	-	-	-	-	-	-	-	-	0.495025	-0.779451	0	NA	0	0	NA	0	0	0.495025	0.779451	0	0.373901	0.779451	0	0.373901	0.779451	0	NA	0	0	0.373901	-0.779451	0	NA	0	0	NA	0	0
144	Acetyl adenylate	C12H16N5O8P	-	388.066	-11	12.03	0.03	3	45851	57291	-	-	17046	-	-	-	-	-	-	0.00491651	2.0622	27	0.00229178	2.36656	69	0.00229178	2.36656	69	0.00491651	-2.0622	27	0.373901	0.304355	0	0.373901	0.304355	0	0.00229178	-2.36656	69	0.373901	-0.304355	0	NA	0	0	0.00229178	-2.36656	69
145	Acetyl-CoA	C23H38N7O17P3S	+	810.133	7.7	7.09	0.58	1	-	-	-	23825	-	-	-	-	-	-	-	0.495025	-0.467468	0	NA	0	0	NA	0	0	0.495025	0.467468	0	0.373901	0.467468	0	0.373901	0.467468	0	NA	0	0	0.373901	-0.467468	0	NA	0	0	NA	0	0
146	Acylglycerone phosphate	C4H7O7P	-	196.986	-10.5	3.41	0.18	10	36100	41149	205401	78605	432301	35571	44753	38987	41423	50786	-	0.230979	-2.62803	4	0.794841	0.181028	0	0.790019	-0.0421764	0	0.230979	2.62803	4	0.120905	2.80906	8	0.126856	2.58585	7	0.794841	-0.181028	0	0.120905	-2.80906	8	0.674937	-0.223205	0	0.790019	0.0421764	0
147	Adenine	C5H5N5	+	136.062	-3.5	6.42	0.28	11	96211632	69110232	362143872	318533888	358691776	23003074	23135814	15132351	1392954	903196	744686	0.00104255	-2.0674	862578	0.00395904	6.34963	861791	0.0100177	2.01696	20824	0.00104255	2.0674	862578	1.60027e-05	8.41702	3710819859	2.15882e-05	4.08435	144142008	0.00395904	-6.34963	861791	1.60027e-05	-8.41702	3710819859	0.00185713	-4.33267	116295	0.0100177	-2.01696	20824
148	Adenosine	C10H13N5O4	+	268.104	-4.2	6	0.21	11	43596504	51261184	424257472	381495360	305136096	57123724	37485320	35667888	1253496	1608113	1026156	0.00560251	-2.96484	291061	0.00052087	5.19371	1711806	0.69642	0.127217	71	0.00560251	2.96484	291061	0.000449792	8.15856	118030898	0.000773887	3.09206	2279315	0.00052087	-5.19371	1711806	0.000449792	-8.15856	118030898	0.00358577	-5.0665	208964	0.69642	-0.127217	71
149	Adenosine 3',5'-bisphosphate	C10H15N5O10P2	+	428.037	-4.4	12.36	0.4	3	-	-	338450	388831	490912	-	-	-	-	-	-	0.126694	-0.513074	4	NA	0	0	NA	0	0	0.126694	0.513074	4	0.0535533	0.513074	9	0.0535533	0.513074	9	NA	0	0	0.0535533	-0.513074	9	NA	0	0	NA	0	0
150	Adenylyl sulfate	C10H14N5O10PS	+	428.027	15	12.32	0.38	3	-	-	248387	312007	482792	-	-	-	-	-	-	0.192339	-0.824854	3	NA	0	0	NA	0	0	0.192339	0.824854	3	0.0964931	0.824854	5	0.0964931	0.824854	5	NA	0	0	0.0964931	-0.824854	5	NA	0	0	NA	0	0
151	ADP	C10H15N5O10P2	+	428.037	-4.4	12.36	0.4	3	-	-	338450	388831	490912	-	-	-	-	-	-	0.126694	-0.513074	4	NA	0	0	NA	0	0	0.126694	0.513074	4	0.0535533	0.513074	9	0.0535533	0.513074	9	NA	0	0	0.0535533	-0.513074	9	NA	0	0	NA	0	0
152	all-trans-18-Hydroxyretinoic acid	C20H28O3	+	317.211	9.1	3.04	0.11	8	302703	536167	785216	799939	1545503	339613	-	-	507491	352585	-	0.159816	-1.31498	11	0.775889	0.136692	1	0.286684	0.469804	2	0.159816	1.31498	11	0.0632511	1.45168	31	0.0422641	1.78479	55	0.775889	-0.136692	1	0.0632511	-1.45168	31	0.3148	0.333112	1	0.286684	-0.469804	2
153	all-trans-4-Hydroxyretinoic acid	C20H28O3	+	317.211	9.1	3.04	0.11	8	302703	536167	785216	799939	1545503	339613	-	-	507491	352585	-	0.159816	-1.31498	11	0.775889	0.136692	1	0.286684	0.469804	2	0.159816	1.31498	11	0.0632511	1.45168	31	0.0422641	1.78479	55	0.775889	-0.136692	1	0.0632511	-1.45168	31	0.3148	0.333112	1	0.286684	-0.469804	2
154	all-trans-5,6-Epoxyretinoic acid	C20H28O3	+	317.211	9.1	3.04	0.11	8	302703	536167	785216	799939	1545503	339613	-	-	507491	352585	-	0.159816	-1.31498	11	0.775889	0.136692	1	0.286684	0.469804	2	0.159816	1.31498	11	0.0632511	1.45168	31	0.0422641	1.78479	55	0.775889	-0.136692	1	0.0632511	-1.45168	31	0.3148	0.333112	1	0.286684	-0.469804	2
155	alpha,alpha-Trehalose	C12H22O11	-	341.109	-4.8	12.44	0.88	11	294697728	282195552	393028032	465319424	494527072	549208	486781	1055273	3305020	2278310	2580754	0.0255347	-0.644689	22636	9.6558e-06	6.72783	1598102035	9.38842e-06	8.69275	6371909988	0.0255347	0.644689	22636	0.000119496	7.37252	314569830	0.000117377	9.33744	1244636872	9.6558e-06	-6.72783	1598102035	0.000119496	-7.37252	314569830	0.00461884	1.96492	1445	9.38842e-06	-8.69275	6371909988
156	alpha-D-Galactose	C6H12O6	-	179.056	-7.9	11.25	0.49	7	1485453	1376017	24022348	10325849	14125584	-	-	-	-	2002693	755390	0.0681744	-3.49741	1457	0.646978	0.314021	2	0.000370866	1.0426	5902	0.0681744	3.49741	1457	0.0216524	3.81143	5612	0.0193042	4.54002	10155	0.646978	-0.314021	2	0.0216524	-3.81143	5612	0.344685	0.728581	4	0.000370866	-1.0426	5902
157	alpha-D-Galactose 1-phosphate	C6H13O9P	-	259.022	-4.8	13.99	0.09	7	13248660	6775914	8517686	5067621	5726525	-	-	674002	-	673201	-	0.287553	0.637249	44	0.0304004	3.91915	2656	0.0304026	3.91857	2655	0.287553	-0.637249	44	0.00546455	3.2819	6318	0.00546549	3.28132	6314	0.0304004	-3.91915	2656	0.00546455	-3.2819	6318	0.975659	-0.000581897	1	0.0304026	-3.91857	2655
158	alpha-D-Glucose	C6H12O6	-	179.056	-7.9	11.25	0.49	7	1485453	1376017	24022348	10325849	14125584	-	-	-	-	2002693	755390	0.0681744	-3.49741	1457	0.646978	0.314021	2	0.000370866	1.0426	5902	0.0681744	3.49741	1457	0.0216524	3.81143	5612	0.0193042	4.54002	10155	0.646978	-0.314021	2	0.0216524	-3.81143	5612	0.344685	0.728581	4	0.000370866	-1.0426	5902
159	alpha-D-Glucose 6-phosphate	C6H13O9P	-	259.022	-4.8	13.99	0.09	7	13248660	6775914	8517686	5067621	5726525	-	-	674002	-	673201	-	0.287553	0.637249	44	0.0304004	3.91915	2656	0.0304026	3.91857	2655	0.287553	-0.637249	44	0.00546455	3.2819	6318	0.00546549	3.28132	6314	0.0304004	-3.91915	2656	0.00546455	-3.2819	6318	0.975659	-0.000581897	1	0.0304026	-3.91857	2655
160	alpha-D-Ribose 1-phosphate	C5H11O8P	-	229.012	-6.5	12.93	0.65	8	304212	151846	238486	97325	113876	56857	48623	174213	-	-	-	0.404998	0.605259	1	0.0471906	2.40651	15	0.179303	1.29034	2	0.404998	-0.605259	1	0.0744258	1.80125	5	0.400215	0.685077	0	0.0471906	-2.40651	15	0.0744258	-1.80125	5	0.283348	-1.11617	1	0.179303	-1.29034	2
161	alpha-Isopropylmalate	C7H12O5	-	175.061	0.6	5.2	0.61	0	-	-	-	-	-	-	-	-	-	-	-	NA	0	0	NA	0	0	NA	0	0	NA	0	0	NA	0	0	NA	0	0	NA	0	0	NA	0	0	NA	0	0	NA	0	0
162	Aminoimidazole ribotide	C8H14N3O7P	+	296.064	12.8	7.1	0.13	8	929571	788428	814665	679754	622697	60102	33042	87012	-	-	-	0.188379	0.283591	5	0.000517319	6.42459	72148	0.000758717	3.83837	8664	0.188379	-0.283591	5	0.000257176	6.14099	98197	0.0003963	3.55478	11354	0.000517319	-6.42459	72148	0.000257176	-6.14099	98197	0.0325078	-2.58621	6	0.000758717	-3.83837	8664
163	Aminopropylcadaverine	C8H21N3	+	160.181	7.3	3.25	0.97	1	-	-	-	-	-	-	-	80746	-	-	-	NA	0	0	NA	0	0	0.495025	-0.865762	0	NA	0	0	NA	0	0	0.373901	-0.865762	0	NA	0	0	NA	0	0	0.373901	-0.865762	0	0.495025	0.865762	0
164	AMP	C10H14N5O7P	+	348.07	-4.5	10.01	0.55	9	537441	673482	1321890	456067	843682	6072554	5649910	19264552	-	-	112891	0.472145	-0.529399	2	0.00297798	3.34163	1132	0.190553	-4.09252	489	0.472145	0.529399	2	0.0318762	3.87103	214	0.102237	-3.56312	648	0.00297798	-3.34163	1132	0.0318762	-3.87103	214	0.083156	-7.43415	10803	0.190553	4.09252	489
165	Anthranilate	C7H7NO2	+	138.055	-4	8.56	0.28	7	2240347	2521030	9267107	11645257	14221273	50707	52682	-	-	-	-	0.0150254	-2.29844	2307	0.000196227	5.78369	340244	0.000198024	5.60634	298852	0.0150254	2.29844	2307	0.0012298	8.08213	1295090	0.00123208	7.90478	1143713	0.000196227	-5.78369	340244	0.0012298	-8.08213	1295090	0.121484	-0.177346	0	0.000198024	-5.60634	298852
166	Arachidonate	C20H32O2	-	303.233	-5.1	2.89	0.11	11	832724	383856	745675	441872	1259178	7062802	2931910	3999868	1890696	1237708	1256779	0.59578	-0.423058	2	0.0778257	-1.26484	32	0.0858449	-2.939	236	0.59578	0.423058	2	0.114262	-0.841785	18	0.0379096	-2.51594	413	0.0778257	1.26484	32	0.114262	0.841785	18	0.0633459	-1.67416	154	0.0858449	2.939	236
167	ATP	C10H16N5O13P3	-	505.988	-7.6	13.75	0.54	6	56492	57584	67395	116205	325539	-	-	35622	-	-	-	0.350824	-1.5731	1	9.66768e-06	0.825759	8179	0.0005907	0.775218	131	0.350824	1.5731	1	0.157382	2.39886	3	0.160106	2.34832	3	9.66768e-06	-0.825759	8179	0.157382	-2.39886	3	0.373901	-0.0505416	0	0.0005907	-0.775218	131
168	Benzoate	C7H6O2	-	121.029	-13.2	3.76	0.52	11	2634024	1291758	16943398	20520086	21056858	4783122	4469630	3333435	3019794	1275514	2857030	0.00207819	-3.31292	51333	0.66324	-0.280472	4	0.0601165	-1.09583	109	0.00207819	3.31292	51333	0.000260771	3.03245	343426	0.000358755	2.2171	153593	0.66324	0.280472	4	0.000260771	-3.03245	343426	0.0631108	-0.815354	92	0.0601165	1.09583	109
169	beta-Alanine	C3H7NO2	+	90.055	1.6	11.24	0.15	11	60964112	55875068	88900512	88261016	103269304	35133704	21054246	30135908	3007352	2726451	2915061	0.0130501	-0.678158	9312	8.7877e-05	4.34083	7067960	0.0134679	1.02166	6572	0.0130501	0.678158	9312	5.03779e-05	5.01899	31009363	0.000539487	1.69981	368077	8.7877e-05	-4.34083	7067960	5.03779e-05	-5.01899	31009363	0.00327971	-3.31918	48171	0.0134679	-1.02166	6572
170	beta-D-Fructose	C6H12O6	-	179.056	-7.9	11.25	0.49	7	1485453	1376017	24022348	10325849	14125584	-	-	-	-	2002693	755390	0.0681744	-3.49741	1457	0.646978	0.314021	2	0.000370866	1.0426	5902	0.0681744	3.49741	1457	0.0216524	3.81143	5612	0.0193042	4.54002	10155	0.646978	-0.314021	2	0.0216524	-3.81143	5612	0.344685	0.728581	4	0.000370866	-1.0426	5902
171	beta-D-Fructose 2,6-bisphosphate	C6H14O12P2	+	341.003	13.4	5.32	0.13	3	-	-	-	-	-	-	-	-	11586	22368	34051	NA	0	0	0.227549	-1.18068	0	NA	0	0	NA	0	0	0.122544	-1.18068	0	NA	0	0	0.227549	1.18068	0	0.122544	1.18068	0	0.122544	1.18068	0	NA	0	0
172	beta-D-Fructose 6-phosphate	C6H13O9P	-	259.022	-4.8	13.99	0.09	7	13248660	6775914	8517686	5067621	5726525	-	-	674002	-	673201	-	0.287553	0.637249	44	0.0304004	3.91915	2656	0.0304026	3.91857	2655	0.287553	-0.637249	44	0.00546455	3.2819	6318	0.00546549	3.28132	6314	0.0304004	-3.91915	2656	0.00546455	-3.2819	6318	0.975659	-0.000581897	1	0.0304026	-3.91857	2655
173	beta-D-Galactosyl-(1->4)-beta-D-glucosyl-(1<->1)-ceramide	C42H79NO13	+	806.562	4.7	2.81	0.08	9	187992	37465	188289	151785	323217	469683	141750	105449	23792	-	-	0.304155	-0.971827	1	0.180314	2.94908	3	0.487045	-1.08392	1	0.304155	0.971827	1	0.016882	3.9209	106	0.894962	-0.112094	0	0.180314	-2.94908	3	0.016882	-3.9209	106	0.12504	-4.033	17	0.487045	1.08392	1
174	beta-D-Glucose	C6H12O6	-	179.056	-7.9	11.25	0.49	7	1485453	1376017	24022348	10325849	14125584	-	-	-	-	2002693	755390	0.0681744	-3.49741	1457	0.646978	0.314021	2	0.000370866	1.0426	5902	0.0681744	3.49741	1457	0.0216524	3.81143	5612	0.0193042	4.54002	10155	0.646978	-0.314021	2	0.0216524	-3.81143	5612	0.344685	0.728581	4	0.000370866	-1.0426	5902
175	beta-D-Glucose 6-phosphate	C6H13O9P	-	259.022	-4.8	13.99	0.09	7	13248660	6775914	8517686	5067621	5726525	-	-	674002	-	673201	-	0.287553	0.637249	44	0.0304004	3.91915	2656	0.0304026	3.91857	2655	0.287553	-0.637249	44	0.00546455	3.2819	6318	0.00546549	3.28132	6314	0.0304004	-3.91915	2656	0.00546455	-3.2819	6318	0.975659	-0.000581897	1	0.0304026	-3.91857	2655
176	beta-D-Glucosyl-(1<->1)-ceramide	C48H93NO8	+	812.697	-10.3	3.18	0.24	1	-	-	119273	-	-	-	-	-	-	-	-	0.495025	-1.91209	0	NA	0	0	NA	0	0	0.495025	1.91209	0	0.373901	1.91209	0	0.373901	1.91209	0	NA	0	0	0.373901	-1.91209	0	NA	0	0	NA	0	0
177	Betaine	C5H11NO2	+	118.086	-2.2	8.08	0.27	11	1931648128	2092388992	2066617344	2196990720	2182682112	414744768	270328960	300571168	30906256	31890692	37854640	0.186646	-0.094863	11904	6.12144e-05	5.90616	1001990210	0.000257608	2.61447	27820480	0.186646	0.094863	11904	8.72962e-07	6.00103	80053607493	7.1804e-06	2.70933	1128213564	6.12144e-05	-5.90616	1001990210	8.72962e-07	-6.00103	80053607493	0.00258148	-3.2917	686796	0.000257608	-2.61447	27820480
178	Betaine aldehyde	C5H12NO	+	103.099	14.9	3.18	0.87	2	-	-	95588	-	-	-	58787	-	-	-	-	0.495025	-1.45641	0	NA	0	0	0.495025	-0.959311	0	0.495025	1.45641	0	0.373901	1.45641	0	0.707384	0.497094	0	NA	0	0	0.373901	-1.45641	0	0.373901	-0.959311	0	0.495025	0.959311	0
179	beta-Isopropylmaleate	C7H10O4	-	157.051	-0.2	2.02	0.75	0	-	-	-	-	-	-	-	-	-	-	-	NA	0	0	NA	0	0	NA	0	0	NA	0	0	NA	0	0	NA	0	0	NA	0	0	NA	0	0	NA	0	0	NA	0	0
180	Butanoyl-CoA	C25H42N7O17P3S	+	838.164	-5.5	9.9	0.32	2	-	-	12263	-	43797	-	-	-	-	-	-	0.456085	-1.13881	0	NA	0	0	NA	0	0	0.456085	1.13881	0	0.332335	1.13881	0	0.332335	1.13881	0	NA	0	0	0.332335	-1.13881	0	NA	0	0	NA	0	0
181	Cadaverine	C5H14N2	+	103.123	1.2	7.89	0.86	1	-	-	-	-	-	61177	-	-	-	-	-	NA	0	0	NA	0	0	0.495025	-0.122459	0	NA	0	0	NA	0	0	0.373901	-0.122459	0	NA	0	0	NA	0	0	0.373901	-0.122459	0	0.495025	0.122459	0
182	Caffeine	C8H10N4O2	-	193.073	-10.9	7.46	0.88	0	-	-	-	-	-	-	-	-	-	-	-	NA	0	0	NA	0	0	NA	0	0	NA	0	0	NA	0	0	NA	0	0	NA	0	0	NA	0	0	NA	0	0	NA	0	0
183	Carbamoyl phosphate	CH4NO5P	-	139.975	-11.7	27.57	0.35	11	7639692	8593880	8449456	8872298	9040934	986983	1086028	1158558	766098	824076	847261	0.210115	-0.114554	44	0.00025521	3.32051	174767	0.000295473	2.91364	117232	0.210115	0.114554	44	1.46982e-06	3.43506	35321224	1.8892e-06	3.02819	21298799	0.00025521	-3.32051	174767	1.46982e-06	-3.43506	35321224	0.00871775	-0.406871	144	0.000295473	-2.91364	117232
184	CDP	C9H15N3O11P2	+	404.026	11.5	7.58	0.16	0	-	-	-	-	-	-	-	-	-	-	-	NA	0	0	NA	0	0	NA	0	0	NA	0	0	NA	0	0	NA	0	0	NA	0	0	NA	0	0	NA	0	0	NA	0	0
185	CDP-choline	C14H26N4O11P2	+	489.115	-4.1	12.25	0.15	6	2649256	1231401	2427342	886745	1535914	18240	-	-	-	-	-	0.706776	0.263278	3	0.03556	7.21114	4070	0.0356417	7.03359	3593	0.706776	-0.263278	3	0.0229427	6.94786	4385	0.023022	6.77031	3868	0.03556	-7.21114	4070	0.0229427	-6.94786	4385	0.373901	-0.177556	0	0.0356417	-7.03359	3593
186	CDP-ethanolamine	C11H20N4O11P2	-	445.053	-11	13.4	0.1	5	36719	27978	73987	43841	73518	-	-	-	-	-	-	0.0987547	-0.979451	1	0.00634089	1.6937	11	0.00634089	1.6937	11	0.0987547	0.979451	1	0.00571647	2.67315	41	0.00571647	2.67315	41	0.00634089	-1.6937	11	0.00571647	-2.67315	41	NA	0	0	0.00634089	-1.6937	11
187	Chitobiose	C15H26N2O12	+	427.156	9.2	11.07	0.16	5	645722	527466	741656	516130	505658	-	-	-	-	-	-	0.991746	-0.00299904	1	0.000964432	5.87429	18143	0.000964432	5.87429	18143	0.991746	0.00299904	1	0.00168574	5.87729	10423	0.00168574	5.87729	10423	0.000964432	-5.87429	18143	0.00168574	-5.87729	10423	NA	0	0	0.000964432	-5.87429	18143
188	Chloroacetic acid	C2H3ClO2	-	92.9749	-13.8	0.08	0.21	0	-	-	-	-	-	-	-	-	-	-	-	NA	0	0	NA	0	0	NA	0	0	NA	0	0	NA	0	0	NA	0	0	NA	0	0	NA	0	0	NA	0	0	NA	0	0
189	Cholesterol	C27H46O	+	387.362	12.5	2.83	0.18	0	-	-	-	-	-	-	-	-	-	-	-	NA	0	0	NA	0	0	NA	0	0	NA	0	0	NA	0	0	NA	0	0	NA	0	0	NA	0	0	NA	0	0	NA	0	0
190	Choline	C5H14NO	+	105.115	15.1	3.39	0.21	1	-	-	52618	-	-	-	-	-	-	-	-	0.495025	-1.02299	0	NA	0	0	NA	0	0	0.495025	1.02299	0	0.373901	1.02299	0	0.373901	1.02299	0	NA	0	0	0.373901	-1.02299	0	NA	0	0	NA	0	0
191	Choline phosphate	C5H15NO4P	-	183.067	0.6	5.11	0.74	0	-	-	-	-	-	-	-	-	-	-	-	NA	0	0	NA	0	0	NA	0	0	NA	0	0	NA	0	0	NA	0	0	NA	0	0	NA	0	0	NA	0	0	NA	0	0
192	cis-2-Methyl-5-isopropylhexa-2,5-dienoyl-CoA	C31H50N7O17P3S	+	918.227	-14.5	25.98	0.69	1	-	-	-	-	-	-	54253	-	-	-	-	NA	0	0	NA	0	0	0.495025	-1.23581	0	NA	0	0	NA	0	0	0.373901	-1.23581	0	NA	0	0	NA	0	0	0.373901	-1.23581	0	0.495025	1.23581	0
193	cis-Aconitate	C6H6O6	-	173.009	-8.4	15.17	0.45	7	4394282	4801174	1691339	341550	581275	469296	-	665448	-	-	-	0.00683955	2.39953	2110	8.99362e-05	4.53348	617523	0.00037703	3.37091	69176	0.00683955	-2.39953	2110	0.180904	2.13395	13	0.384125	0.971375	3	8.99362e-05	-4.53348	617523	0.180904	-2.13395	13	0.143443	-1.16258	5	0.00037703	-3.37091	69176
194	Citrate	C6H8O7	-	191.02	-7.5	8.75	0.45	6	2169271	3650759	21115624	20300404	8561705	-	-	107109	-	-	-	0.079579	-2.51722	704	0.0141377	5.53687	4881	0.0143659	5.23087	3905	0.079579	2.51722	704	0.0149475	8.05409	148666	0.0149926	7.7481	119998	0.0141377	-5.53687	4881	0.0149475	-8.05409	148666	0.373901	-0.305993	0	0.0143659	-5.23087	3905
195	CMP	C9H14N3O8P	+	324.059	-5.9	8.03	0.66	4	-	-	-	-	-	2087308	2067404	5287032	16073	-	-	NA	0	0	0.495025	-0.214132	0	0.107856	-8.17892	4243	NA	0	0	0.373901	-0.214132	0	0.0427516	-8.17892	10704	0.495025	0.214132	0	0.373901	0.214132	0	0.0428211	-7.96479	9218	0.107856	8.17892	4243
196	CoA	C21H36N7O16P3S	+	768.122	-1.2	12	0.24	1	-	-	-	24334	-	-	-	-	-	-	-	0.495025	-0.517808	0	NA	0	0	NA	0	0	0.495025	0.517808	0	0.373901	0.517808	0	0.373901	0.517808	0	NA	0	0	0.373901	-0.517808	0	NA	0	0	NA	0	0
197	Cocaine	C17H21NO4	-	302.14	-8.9	7.16	0.75	0	-	-	-	-	-	-	-	-	-	-	-	NA	0	0	NA	0	0	NA	0	0	NA	0	0	NA	0	0	NA	0	0	NA	0	0	NA	0	0	NA	0	0	NA	0	0
198	Coproporphyrinogen I	C36H44N4O8	+	661.323	-10.1	8.29	0.16	1	-	-	-	63326	-	-	-	-	-	-	-	0.495025	-1.36901	0	NA	0	0	NA	0	0	0.495025	1.36901	0	0.373901	1.36901	0	0.373901	1.36901	0	NA	0	0	0.373901	-1.36901	0	NA	0	0	NA	0	0
199	Coproporphyrinogen III	C36H44N4O8	+	661.323	-10.1	8.29	0.16	1	-	-	-	63326	-	-	-	-	-	-	-	0.495025	-1.36901	0	NA	0	0	NA	0	0	0.495025	1.36901	0	0.373901	1.36901	0	0.373901	1.36901	0	NA	0	0	0.373901	-1.36901	0	NA	0	0	NA	0	0
200	Creatine	C4H9N3O2	+	132.077	-3.4	11.08	0.91	8	743608	781542	1926504	2212593	4148484	18114258	13900636	8060609	-	-	-	0.113093	-1.85704	56	2.15998e-05	2.89963	149380	0.0441501	-4.13074	2801	0.113093	1.85704	56	0.0189074	4.75666	2048	0.0241167	-2.2737	1616	2.15998e-05	-2.89963	149380	0.0189074	-4.75666	2048	0.0104349	-7.03036	84314	0.0441501	4.13074	2801
201	Crotonoyl-CoA	C25H40N7O17P3S	+	836.149	7.8	12.38	0.87	1	-	-	26104	-	-	-	-	-	-	-	-	0.495025	-0.619929	0	NA	0	0	NA	0	0	0.495025	0.619929	0	0.373901	0.619929	0	0.373901	0.619929	0	NA	0	0	0.373901	-0.619929	0	NA	0	0	NA	0	0
202	CTP	C9H16N3O14P3	+	483.992	3.1	13.98	0.09	3	-	-	32474	37970	21720	-	-	-	-	-	-	0.0436226	-1.61924	1	NA	0	0	NA	0	0	0.0436226	1.61924	1	0.0122321	1.61924	5	0.0122321	1.61924	5	NA	0	0	0.0122321	-1.61924	5	NA	0	0	NA	0	0
203	Cys-Gly	C5H10N2O3S	-	177.034	7.1	3.38	0.73	1	-	-	-	-	48225	-	-	-	-	-	-	0.495025	-0.0971931	0	NA	0	0	NA	0	0	0.495025	0.0971931	0	0.373901	0.0971931	0	0.373901	0.0971931	0	NA	0	0	0.373901	-0.0971931	0	NA	0	0	NA	0	0
204	Cytidine	C9H13N3O5	+	244.093	1.7	9.33	0.61	8	31843286	28248948	1751739	2483330	1426878	127047	54483	82180	-	-	-	0.000268024	3.99277	948387	0.000194239	11.4276	213119666	0.000195854	8.41704	26295229	0.000268024	-3.99277	948387	0.00386799	7.43481	42455	0.00454533	4.42427	4665	0.000194239	-11.4276	213119666	0.00386799	-7.43481	42455	0.0219293	-3.01053	18	0.000195854	-8.41704	26295229
205	D-4'-Phosphopantothenate	C9H18NO8P	-	298.07	6.6	7.11	0.96	2	54212	-	25520	-	-	-	-	-	-	-	-	0.30156	0.709398	0	0.272228	0.775714	0	0.272228	0.775714	0	0.30156	-0.709398	0	0.373901	0.0663164	0	0.373901	0.0663164	0	0.272228	-0.775714	0	0.373901	-0.0663164	0	NA	0	0	0.272228	-0.775714	0
206	dADP	C10H15N5O9P2	-	410.027	-12.5	7.41	0.27	2	-	54008	78744	-	-	-	-	-	-	-	-	0.980212	-0.0404784	0	0.272228	1.67825	0	0.272228	1.67825	0	0.980212	0.0404784	0	0.373901	1.71873	0	0.373901	1.71873	0	0.272228	-1.67825	0	0.373901	-1.71873	0	NA	0	0	0.272228	-1.67825	0
207	D-Alanine	C3H7NO2	+	90.055	1.6	11.24	0.15	11	60964112	55875068	88900512	88261016	103269304	35133704	21054246	30135908	3007352	2726451	2915061	0.0130501	-0.678158	9312	8.7877e-05	4.34083	7067960	0.0134679	1.02166	6572	0.0130501	0.678158	9312	5.03779e-05	5.01899	31009363	0.000539487	1.69981	368077	8.7877e-05	-4.34083	7067960	5.03779e-05	-5.01899	31009363	0.00327971	-3.31918	48171	0.0134679	-1.02166	6572
208	D-Alanyl-D-alanine	C6H12N2O3	+	161.092	-2.3	10.75	0.37	10	88567	118785	555031	394754	583303	106552	-	95012	203721	207196	287452	0.0129992	-2.30132	117	0.0399438	-1.16695	9	0.502378	0.225922	0	0.0129992	2.30132	117	0.0126848	1.13438	64	0.00215167	2.52725	803	0.0399438	1.16695	9	0.0126848	-1.13438	64	0.00872487	1.39287	48	0.502378	-0.225922	0
209	dAMP	C10H14N5O6P	+	332.075	-9.2	9.93	0.23	8	71783	37775	135342	55718	87218	22099	15615	18941	-	-	-	0.326535	-0.75987	0	0.0385527	2.45362	5	0.0688778	1.53638	2	0.326535	0.75987	0	0.0232791	3.21349	20	0.0335198	2.29625	8	0.0385527	-2.45362	5	0.0232791	-3.21349	20	0.00899527	-0.917241	3	0.0688778	-1.53638	2
210	dATP	C10H16N5O12P3	+	492.008	3.4	12.93	0.24	1	-	-	-	-	-	-	-	14146	-	-	-	NA	0	0	NA	0	0	0.495025	-0.186754	0	NA	0	0	NA	0	0	0.373901	-0.186754	0	NA	0	0	NA	0	0	0.373901	-0.186754	0	0.495025	0.186754	0
211	dCDP	C9H15N3O10P2	+	388.031	4	19.49	0.27	0	-	-	-	-	-	-	-	-	-	-	-	NA	0	0	NA	0	0	NA	0	0	NA	0	0	NA	0	0	NA	0	0	NA	0	0	NA	0	0	NA	0	0	NA	0	0
212	dCMP	C9H14N3O7P	+	308.064	-5.2	12.03	0.12	5	16894	22194	66579	30546	37154	-	-	-	-	-	-	0.178968	-1.19547	0	0.0214437	0.855027	1	0.0214437	0.855027	1	0.178968	1.19547	0	0.0374447	2.0505	3	0.0374447	2.0505	3	0.0214437	-0.855027	1	0.0374447	-2.0505	3	NA	0	0	0.0214437	-0.855027	1
213	dCTP	C9H16N3O13P3	+	467.997	0.3	11.82	0.49	1	-	-	26472	-	-	-	-	-	-	-	-	0.495025	-0.631399	0	NA	0	0	NA	0	0	0.495025	0.631399	0	0.373901	0.631399	0	0.373901	0.631399	0	NA	0	0	0.373901	-0.631399	0	NA	0	0	NA	0	0
214	Deamino-NAD+	C21H27N6O15P2	+	666.108	13	11.23	0.31	8	139751	65760	125463	98481	59388	15927	14649	51898	-	-	-	0.836958	0.121685	0	0.0436112	3.36114	13	0.0985344	1.90217	2	0.836958	-0.121685	0	0.011668	3.23946	42	0.0421914	1.78048	5	0.0436112	-3.36114	13	0.011668	-3.23946	42	0.225231	-1.45898	0	0.0985344	-1.90217	2
215	Decanoyl-CoA	C31H54N7O17P3S	-	920.244	1.6	5.15	0.22	2	-	18448	-	-	-	-	-	-	34615	-	-	0.272228	0.508327	0	0.742529	-0.356008	0	0.272228	0.508327	0	0.272228	-0.508327	0	0.373901	-0.864335	0	NA	0	0	0.742529	0.356008	0	0.373901	0.864335	0	0.373901	0.864335	0	0.272228	-0.508327	0
216	Demethylphylloquinone	C30H44O2	+	437.341	10.3	3.19	0.5	11	29340446	12591901	33839884	40236888	13185605	19004756	8631876	10695396	21737556	24789594	25023322	0.554673	-0.472334	63	0.682366	-0.185935	37	0.35276	0.714476	78	0.554673	0.472334	63	0.559171	0.286398	58	0.135988	1.18681	350	0.682366	0.185935	37	0.559171	-0.286398	58	0.0295706	0.900411	1156	0.35276	-0.714476	78
217	Deoxyadenosine	C10H13N5O3	+	252.109	-4.4	5.28	0.91	5	156811	222404	2388025	3308136	922192	-	-	-	-	-	-	0.110197	-3.54042	126	0.00730398	2.65883	95	0.00730398	2.65883	95	0.110197	3.54042	126	0.0351096	6.19925	2340	0.0351096	6.19925	2340	0.00730398	-2.65883	95	0.0351096	-6.19925	2340	NA	0	0	0.00730398	-2.65883	95
218	Deoxycytidine	C9H13N3O4	+	228.098	-4.3	7.36	0.8	5	1283187	1142869	640316	1057408	756365	-	-	-	-	-	-	0.101171	0.568388	15	0.000185164	5.81438	187601	0.000185164	5.81438	187601	0.101171	-0.568388	15	0.00304641	5.24599	5229	0.00304641	5.24599	5229	0.000185164	-5.81438	187601	0.00304641	-5.24599	5229	NA	0	0	0.000185164	-5.81438	187601
219	Deoxyguanosine	C10H13N5O4	+	268.104	-4.2	6	0.21	11	43596504	51261184	424257472	381495360	305136096	57123724	37485320	35667888	1253496	1608113	1026156	0.00560251	-2.96484	291061	0.00052087	5.19371	1711806	0.69642	0.127217	71	0.00560251	2.96484	291061	0.000449792	8.15856	118030898	0.000773887	3.09206	2279315	0.00052087	-5.19371	1711806	0.000449792	-8.15856	118030898	0.00358577	-5.0665	208964	0.69642	-0.127217	71
220	Deoxyinosine	C10H12N4O4	+	253.093	-9.6	13.07	0.11	7	1644678	1805885	1715528	1898837	2162154	11174	-	10963	-	-	-	0.34205	-0.158406	6	9.43415e-05	7.43069	1586708	9.44673e-05	7.33142	1479832	0.34205	0.158406	6	0.000122048	7.58909	1526791	0.000122229	7.48982	1423679	9.43415e-05	-7.43069	1586708	0.000122048	-7.58909	1526791	0.11998	-0.0992728	0	9.44673e-05	-7.33142	1479832
221	Deoxyribose	C5H10O4	-	133.051	-1	5.06	0.92	0	-	-	-	-	-	-	-	-	-	-	-	NA	0	0	NA	0	0	NA	0	0	NA	0	0	NA	0	0	NA	0	0	NA	0	0	NA	0	0	NA	0	0	NA	0	0
222	Deoxyuridine	C9H12N2O5	-	227.067	11.7	3.41	0.72	11	737567	1204753	2264038	3128787	6693726	793767	734922	878787	3129091	1494401	3078246	0.180496	-2.05259	57	0.111539	-1.40244	42	0.423014	0.275222	3	0.180496	2.05259	57	0.372832	0.650147	14	0.0760837	2.32781	159	0.111539	1.40244	42	0.372832	-0.650147	14	0.0305376	1.67766	177	0.423014	-0.275222	3
223	Dephospho-CoA	C21H35N7O13P2S	+	688.156	-5.3	12.42	0.84	1	-	-	-	-	-	-	-	17925	-	-	-	NA	0	0	NA	0	0	0.495025	-0.287955	0	NA	0	0	NA	0	0	0.373901	-0.287955	0	NA	0	0	NA	0	0	0.373901	-0.287955	0	0.495025	0.287955	0
224	D-Erythrose 4-phosphate	C4H9O7P	+	201.016	-7.8	5.91	0.19	3	-	-	-	-	-	-	-	-	14520	14457	11341	NA	0	0	0.148593	-0.312828	0	NA	0	0	NA	0	0	0.0670035	-0.312828	0	NA	0	0	0.148593	0.312828	0	0.0670035	0.312828	0	0.0670035	0.312828	0	NA	0	0
225	D-Fructose 1,6-bisphosphate	C6H14O12P2	+	341.003	13.4	5.32	0.13	3	-	-	-	-	-	-	-	-	11586	22368	34051	NA	0	0	0.227549	-1.18068	0	NA	0	0	NA	0	0	0.122544	-1.18068	0	NA	0	0	0.227549	1.18068	0	0.122544	1.18068	0	0.122544	1.18068	0	NA	0	0
226	D-Fructose 1-phosphate	C6H13O9P	-	259.022	-4.8	13.99	0.09	7	13248660	6775914	8517686	5067621	5726525	-	-	674002	-	673201	-	0.287553	0.637249	44	0.0304004	3.91915	2656	0.0304026	3.91857	2655	0.287553	-0.637249	44	0.00546455	3.2819	6318	0.00546549	3.28132	6314	0.0304004	-3.91915	2656	0.00546455	-3.2819	6318	0.975659	-0.000581897	1	0.0304026	-3.91857	2655
227	D-Fructose 6-phosphate	C6H13O9P	-	259.022	-4.8	13.99	0.09	7	13248660	6775914	8517686	5067621	5726525	-	-	674002	-	673201	-	0.287553	0.637249	44	0.0304004	3.91915	2656	0.0304026	3.91857	2655	0.287553	-0.637249	44	0.00546455	3.2819	6318	0.00546549	3.28132	6314	0.0304004	-3.91915	2656	0.00546455	-3.2819	6318	0.975659	-0.000581897	1	0.0304026	-3.91857	2655
228	dGDP	C10H15N5O10P2	+	428.037	-4.4	12.36	0.4	3	-	-	338450	388831	490912	-	-	-	-	-	-	0.126694	-0.513074	4	NA	0	0	NA	0	0	0.126694	0.513074	4	0.0535533	0.513074	9	0.0535533	0.513074	9	NA	0	0	0.0535533	-0.513074	9	NA	0	0	NA	0	0
229	D-Glucarate	C6H10O8	-	209.03	-7.1	14.59	0.43	5	802166	1107512	7876565	8278802	3312506	-	-	-	-	-	-	0.0745634	-2.76473	339	0.0088879	1.86727	250	0.0088879	1.86727	250	0.0745634	2.76473	339	0.0173902	4.632	4813	0.0173902	4.632	4813	0.0088879	-1.86727	250	0.0173902	-4.632	4813	NA	0	0	0.0088879	-1.86727	250
230	D-Glucono-1,5-lactone 6-phosphate	C6H11O9P	+	259.021	0.6	11.1	0.21	8	796520	727513	1043688	820533	891040	121161	59189	62267	-	-	-	0.176497	-0.269332	6	9.15138e-05	5.23329	160776	0.000338409	3.2361	11734	0.176497	0.269332	6	0.0001674	5.50263	127112	0.000262449	3.50544	21620	9.15138e-05	-5.23329	160776	0.0001674	-5.50263	127112	0.0397024	-1.99719	5	0.000338409	-3.2361	11734
231	D-Glucosamine	C6H13NO5	-	178.072	-7.8	8.04	0.92	5	9749580	9664449	11011921	16703681	14981572	-	-	-	-	-	-	0.129025	-0.552079	136	9.58316e-08	3.82918	770503263	9.58316e-08	3.82918	770503263	0.129025	0.552079	136	0.00129894	4.38126	119648	0.00129894	4.38126	119648	9.58316e-08	-3.82918	770503263	0.00129894	-4.38126	119648	NA	0	0	9.58316e-08	-3.82918	770503263
232	D-Glucosamine 6-phosphate	C6H14NO8P	+	260.053	-4.5	12.54	0.91	8	2072068	1236945	2264772	1175173	2119381	210706	351463	130031	-	-	-	0.737325	-0.163547	3	0.0135514	6.07092	4165	0.021523	2.8421	314	0.737325	0.163547	3	0.00587213	6.23447	12038	0.00953996	3.00565	877	0.0135514	-6.07092	4165	0.00587213	-6.23447	12038	0.0333518	-3.22882	36	0.021523	-2.8421	314
233	D-Glucose	C6H12O6	-	179.056	-7.9	11.25	0.49	7	1485453	1376017	24022348	10325849	14125584	-	-	-	-	2002693	755390	0.0681744	-3.49741	1457	0.646978	0.314021	2	0.000370866	1.0426	5902	0.0681744	3.49741	1457	0.0216524	3.81143	5612	0.0193042	4.54002	10155	0.646978	-0.314021	2	0.0216524	-3.81143	5612	0.344685	0.728581	4	0.000370866	-1.0426	5902
234	D-Glucose 1-phosphate	C6H13O9P	-	259.022	-4.8	13.99	0.09	7	13248660	6775914	8517686	5067621	5726525	-	-	674002	-	673201	-	0.287553	0.637249	44	0.0304004	3.91915	2656	0.0304026	3.91857	2655	0.287553	-0.637249	44	0.00546455	3.2819	6318	0.00546549	3.28132	6314	0.0304004	-3.91915	2656	0.00546455	-3.2819	6318	0.975659	-0.000581897	1	0.0304026	-3.91857	2655
235	D-Glucuronolactone	C6H8O6	-	175.025	-8.1	12.4	0.94	5	3536238	528444	1258624	1436561	1270800	-	-	-	-	-	-	0.572077	0.620426	5	0.185342	4.1708	104	0.185342	4.1708	104	0.572077	-0.620426	5	2.99982e-05	3.55037	280185	2.99982e-05	3.55037	280185	0.185342	-4.1708	104	2.99982e-05	-3.55037	280185	NA	0	0	0.185342	-4.1708	104
236	D-Glutamate	C5H9NO4	+	148.06	-4.3	11.75	0.19	9	479019424	461691136	261841120	163616352	214938096	81916328	52491776	68959992	-	16219775	-	0.00621528	1.13975	121213	1.19109e-05	5.7674	1095251744	6.97874e-05	2.79462	26752013	0.00621528	-1.13975	121213	0.00201637	4.62765	1361474	0.00793508	1.65487	55806	1.19109e-05	-5.7674	1095251744	0.00201637	-4.62765	1361474	0.00315738	-2.97278	95010	6.97874e-05	-2.79462	26752013
237	D-Glutamine	C5H10N2O3	+	147.076	-4.2	11.48	0.2	9	901045312	952788608	947214208	987196032	1009144000	87331064	73883216	65804432	-	94757432	-	0.171466	-0.0820847	5890	0.000247253	4.72728	51524901	3.2652e-05	3.61459	188054712	0.171466	0.0820847	5890	1.10697e-05	4.80937	1286968238	1.20535e-06	3.69668	5684408716	0.000247253	-4.72728	51524901	1.10697e-05	-4.80937	1286968238	0.253613	-1.11269	472	3.2652e-05	-3.61459	188054712
238	D-Glycerate	C3H6O4	-	105.019	-14.6	9.19	0.95	5	8296716	8530718	6084224	5109170	5880096	-	-	-	-	-	-	0.00617115	0.56402	1690	2.55301e-06	6.2645	128327971	2.55301e-06	6.2645	128327971	0.00617115	-0.56402	1690	4.714e-05	5.70049	3199418	4.714e-05	5.70049	3199418	2.55301e-06	-6.2645	128327971	4.714e-05	-5.70049	3199418	NA	0	0	2.55301e-06	-6.2645	128327971
239	dGMP	C10H14N5O7P	+	348.07	-4.5	10.01	0.55	9	537441	673482	1321890	456067	843682	6072554	5649910	19264552	-	-	112891	0.472145	-0.529399	2	0.00297798	3.34163	1132	0.190553	-4.09252	489	0.472145	0.529399	2	0.0318762	3.87103	214	0.102237	-3.56312	648	0.00297798	-3.34163	1132	0.0318762	-3.87103	214	0.083156	-7.43415	10803	0.190553	4.09252	489
240	dGTP	C10H16N5O13P3	-	505.988	-7.6	13.75	0.54	6	56492	57584	67395	116205	325539	-	-	35622	-	-	-	0.350824	-1.5731	1	9.66768e-06	0.825759	8179	0.0005907	0.775218	131	0.350824	1.5731	1	0.157382	2.39886	3	0.160106	2.34832	3	9.66768e-06	-0.825759	8179	0.157382	-2.39886	3	0.373901	-0.0505416	0	0.0005907	-0.775218	131
241	dIDP	C10H14N4O10P2	+	413.026	-12.8	4.25	0.54	1	-	-	-	-	-	-	-	-	-	19596	-	NA	0	0	0.495025	-0.121901	0	NA	0	0	NA	0	0	0.373901	-0.121901	0	NA	0	0	0.495025	0.121901	0	0.373901	0.121901	0	0.373901	0.121901	0	NA	0	0
242	Dihydroceramide	C19H39NO3	+	330.3	-2.6	3.25	0.93	1	73767	-	-	-	-	-	-	-	-	-	-	0.272228	0.0612582	0	0.272228	0.0612582	0	0.272228	0.0612582	0	0.272228	-0.0612582	0	NA	0	0	NA	0	0	0.272228	-0.0612582	0	NA	0	0	NA	0	0	0.272228	-0.0612582	0
243	Dihydrofolate	C19H21N7O6	+	444.163	14.6	3.8	0.65	1	-	-	-	-	-	-	-	-	13552	-	-	NA	0	0	0.495025	-0.0119713	0	NA	0	0	NA	0	0	0.373901	-0.0119713	0	NA	0	0	0.495025	0.0119713	0	0.373901	0.0119713	0	0.373901	0.0119713	0	NA	0	0
244	Dihydropteroate	C14H14N6O3	+	315.12	14.9	11.56	0.23	7	498109	494291	-	482736	467158	39774	25746	-	-	46695	-	0.443455	0.633009	1	8.22193e-05	4.48023	70368	2.95325e-05	4.30095	173994	0.443455	-0.633009	1	0.128107	3.84722	19	0.130483	3.66794	17	8.22193e-05	-4.48023	70368	0.128107	-3.84722	19	0.853625	-0.17928	0	2.95325e-05	-4.30095	173994
245	Dimethylallyl diphosphate	C5H12O7P2	+	247.013	-2	10.87	0.46	1	-	-	-	69846	-	-	-	-	-	-	-	0.495025	-1.58249	0	NA	0	0	NA	0	0	0.495025	1.58249	0	0.373901	1.58249	0	0.373901	1.58249	0	NA	0	0	0.373901	-1.58249	0	NA	0	0	NA	0	0
246	dITP	C10H15N4O13P3	+	492.992	-11.4	5.01	0.16	0	-	-	-	-	-	-	-	-	-	-	-	NA	0	0	NA	0	0	NA	0	0	NA	0	0	NA	0	0	NA	0	0	NA	0	0	NA	0	0	NA	0	0	NA	0	0
247	D-Mannose	C6H12O6	-	179.056	-7.9	11.25	0.49	7	1485453	1376017	24022348	10325849	14125584	-	-	-	-	2002693	755390	0.0681744	-3.49741	1457	0.646978	0.314021	2	0.000370866	1.0426	5902	0.0681744	3.49741	1457	0.0216524	3.81143	5612	0.0193042	4.54002	10155	0.646978	-0.314021	2	0.0216524	-3.81143	5612	0.344685	0.728581	4	0.000370866	-1.0426	5902
248	D-Mannose 1-phosphate	C6H13O9P	-	259.022	-4.8	13.99	0.09	7	13248660	6775914	8517686	5067621	5726525	-	-	674002	-	673201	-	0.287553	0.637249	44	0.0304004	3.91915	2656	0.0304026	3.91857	2655	0.287553	-0.637249	44	0.00546455	3.2819	6318	0.00546549	3.28132	6314	0.0304004	-3.91915	2656	0.00546455	-3.2819	6318	0.975659	-0.000581897	1	0.0304026	-3.91857	2655
249	D-Mannose 6-phosphate	C6H13O9P	-	259.022	-4.8	13.99	0.09	7	13248660	6775914	8517686	5067621	5726525	-	-	674002	-	673201	-	0.287553	0.637249	44	0.0304004	3.91915	2656	0.0304026	3.91857	2655	0.287553	-0.637249	44	0.00546455	3.2819	6318	0.00546549	3.28132	6314	0.0304004	-3.91915	2656	0.00546455	-3.2819	6318	0.975659	-0.000581897	1	0.0304026	-3.91857	2655
250	D-myo-Inositol 1,4,5-trisphosphate	C6H15O15P3	+	420.97	-5.6	7.65	0.42	1	-	-	-	-	35516	-	-	-	-	-	-	0.495025	-0.816201	0	NA	0	0	NA	0	0	0.495025	0.816201	0	0.373901	0.816201	0	0.373901	0.816201	0	NA	0	0	0.373901	-0.816201	0	NA	0	0	NA	0	0
251	Dodecanoic acid	C12H24O2	-	199.17	-7.3	2.89	0.12	7	483540	-	-	-	-	3491110	2367339	3250056	1324231	916655	1497372	0.272228	0.00771967	2	0.041149	-1.37338	54	0.0102268	-2.65822	1085	0.272228	-0.00771967	2	0.0111617	-1.38109	201	0.00170106	-2.66594	6556	0.041149	1.37338	54	0.0111617	1.38109	201	0.00944787	-1.28485	552	0.0102268	2.65822	1085
252	Dolichyl beta-D-glucosyl phosphate	C21H39O9P	+	467.24	-13.2	2.74	0.51	8	111502	-	125067	19622	33895	387958	56857	381200	-	-	17431	0.946478	0.0950613	0	0.277098	1.96798	1	0.241584	-2.1145	3	0.946478	-0.0950613	0	0.260336	1.87292	1	0.131639	-2.20957	6	0.277098	-1.96798	1	0.260336	-1.87292	1	0.0767134	-4.08249	32	0.241584	2.1145	3
253	Dolichyl diphosphate	C12H26O7P2	-	343.108	10.2	12.44	0.38	8	5423652	4765544	6715624	8709571	9434513	-	-	-	41510	55343	42013	0.0594554	-0.701807	183	0.000250967	6.78217	1127269	0.000246068	8.48014	3706945	0.0594554	0.701807	183	0.000533136	7.48397	1399027	0.000525151	9.18195	4590391	0.000250967	-6.78217	1127269	0.000533136	-7.48397	1399027	0.0021123	1.69798	47	0.000246068	-8.48014	3706945
254	Dolichyl phosphate D-mannose	C6H13O9P	-	259.022	-4.8	13.99	0.09	7	13248660	6775914	8517686	5067621	5726525	-	-	674002	-	673201	-	0.287553	0.637249	44	0.0304004	3.91915	2656	0.0304026	3.91857	2655	0.287553	-0.637249	44	0.00546455	3.2819	6318	0.00546549	3.28132	6314	0.0304004	-3.91915	2656	0.00546455	-3.2819	6318	0.975659	-0.000581897	1	0.0304026	-3.91857	2655
255	D-Ribose	C5H10O5	-	149.046	0.4	2.08	0.84	0	-	-	-	-	-	-	-	-	-	-	-	NA	0	0	NA	0	0	NA	0	0	NA	0	0	NA	0	0	NA	0	0	NA	0	0	NA	0	0	NA	0	0	NA	0	0
256	D-Ribose 5-phosphate	C5H11O8P	-	229.012	-6.5	12.93	0.65	8	304212	151846	238486	97325	113876	56857	48623	174213	-	-	-	0.404998	0.605259	1	0.0471906	2.40651	15	0.179303	1.29034	2	0.404998	-0.605259	1	0.0744258	1.80125	5	0.400215	0.685077	0	0.0471906	-2.40651	15	0.0744258	-1.80125	5	0.283348	-1.11617	1	0.179303	-1.29034	2
257	D-Ribulose 5-phosphate	C5H11O8P	-	229.012	-6.5	12.93	0.65	8	304212	151846	238486	97325	113876	56857	48623	174213	-	-	-	0.404998	0.605259	1	0.0471906	2.40651	15	0.179303	1.29034	2	0.404998	-0.605259	1	0.0744258	1.80125	5	0.400215	0.685077	0	0.0471906	-2.40651	15	0.0744258	-1.80125	5	0.283348	-1.11617	1	0.179303	-1.29034	2
258	D-Tagatose 1,6-bisphosphate	C6H14O12P2	+	341.003	13.4	5.32	0.13	3	-	-	-	-	-	-	-	-	11586	22368	34051	NA	0	0	0.227549	-1.18068	0	NA	0	0	NA	0	0	0.122544	-1.18068	0	NA	0	0	0.227549	1.18068	0	0.122544	1.18068	0	0.122544	1.18068	0	NA	0	0
259	D-Tagatose 6-phosphate	C6H13O9P	-	259.022	-4.8	13.99	0.09	7	13248660	6775914	8517686	5067621	5726525	-	-	674002	-	673201	-	0.287553	0.637249	44	0.0304004	3.91915	2656	0.0304026	3.91857	2655	0.287553	-0.637249	44	0.00546455	3.2819	6318	0.00546549	3.28132	6314	0.0304004	-3.91915	2656	0.00546455	-3.2819	6318	0.975659	-0.000581897	1	0.0304026	-3.91857	2655
260	dTDP	C10H16N2O11P2	-	401.016	-7.9	26.13	0.44	6	-	-	-	-	-	98551	76076	82629	125112	109976	106177	NA	0	0	0.000806744	-3.50786	873	0.00309892	-3.10017	132	NA	0	0	5.67433e-05	-3.50786	12405	0.000343384	-3.10017	1196	0.000806744	3.50786	873	5.67433e-05	3.50786	12405	0.0338215	0.407688	4	0.00309892	3.10017	132
261	dTMP	C10H15N2O8P	-	321.049	0.2	10.25	0.14	8	76692	50545	99165	32770	64681	17337	17453	15159	-	-	-	0.946995	-0.0429	0	0.0118147	2.66945	20	0.0172403	1.93395	9	0.946995	0.0429	0	0.0442528	2.71235	6	0.0634281	1.97685	3	0.0118147	-2.66945	20	0.0442528	-2.71235	6	0.00087601	-0.735493	25	0.0172403	-1.93395	9
262	dTTP	C10H17N2O14P3	+	482.997	-12.5	7.49	0.17	0	-	-	-	-	-	-	-	-	-	-	-	NA	0	0	NA	0	0	NA	0	0	NA	0	0	NA	0	0	NA	0	0	NA	0	0	NA	0	0	NA	0	0	NA	0	0
263	dUMP	C9H13N2O8P	+	309.048	-2.7	11.18	0.11	1	-	-	-	-	-	-	-	-	-	16186	-	NA	0	0	0.495025	-0.270469	0	NA	0	0	NA	0	0	0.373901	-0.270469	0	NA	0	0	0.495025	0.270469	0	0.373901	0.270469	0	0.373901	0.270469	0	NA	0	0
264	dUTP	C9H15N2O14P3	+	468.981	13.7	7.31	0.33	1	-	-	-	13244	-	-	-	-	-	-	-	0.495025	-0.0995019	0	NA	0	0	NA	0	0	0.495025	0.0995019	0	0.373901	0.0995019	0	0.373901	0.0995019	0	NA	0	0	0.373901	-0.0995019	0	NA	0	0	NA	0	0
265	D-Xylulose 5-phosphate	C5H11O8P	-	229.012	-6.5	12.93	0.65	8	304212	151846	238486	97325	113876	56857	48623	174213	-	-	-	0.404998	0.605259	1	0.0471906	2.40651	15	0.179303	1.29034	2	0.404998	-0.605259	1	0.0744258	1.80125	5	0.400215	0.685077	0	0.0471906	-2.40651	15	0.0744258	-1.80125	5	0.283348	-1.11617	1	0.179303	-1.29034	2
266	Ecgonine methyl ester	C10H17NO3	+	200.128	-5.1	3.53	0.72	11	101603	94022	240483	230319	341616	115464	100515	80990	237054	135401	183892	0.032784	-1.46917	16	0.104405	-0.922932	3	0.934517	-0.0172591	0	0.032784	1.46917	16	0.137645	0.546237	2	0.00961794	1.45191	53	0.104405	0.922932	3	0.137645	-0.546237	2	0.0493865	0.905673	5	0.934517	0.0172591	0
267	Ethanolamine phosphate	C2H8NO4P	+	142.026	-1.9	12.93	0.3	4	-	-	367748	456137	457083	-	-	170040	-	-	-	0.00312163	-2.22117	387	NA	0	0	0.495025	-0.362453	0	0.00312163	2.22117	387	0.00034676	2.22117	3486	0.00143917	1.85871	686	NA	0	0	0.00034676	-2.22117	3486	0.373901	-0.362453	0	0.495025	0.362453	0
268	FAD	C27H33N9O15P2	+	786.164	-4.5	8.82	0.18	8	65826	31833	28113	31391	43939	11942	13267	22089	-	-	-	0.38424	0.501951	0	0.0547747	2.28775	3	0.0890759	1.63094	1	0.38424	-0.501951	0	0.00709979	1.7858	11	0.0317255	1.12898	2	0.0547747	-2.28775	3	0.00709979	-1.7858	11	0.144444	-0.656817	0	0.0890759	-1.63094	1
269	FMN	C17H21N4O9P	+	457.112	-5.7	8.9	0.23	7	47036	46590	79656	-	34813	35971	24676	20416	-	-	-	0.871235	0.145729	0	2.50144e-07	1.90764	444649	0.0456599	0.792828	1	0.871235	-0.145729	0	0.205406	1.76191	0	0.492924	0.647099	0	2.50144e-07	-1.90764	444649	0.205406	-1.76191	0	0.0350539	-1.11481	1	0.0456599	-0.792828	1
270	Folate	C19H19N7O6	-	440.132	3.6	5.83	0.38	7	25699	29507	50006	36890	24026	29935	-	-	-	37072	-	0.408903	-0.421686	0	0.984625	0.00696816	0	0.517404	0.137655	0	0.408903	0.421686	0	0.345982	0.428654	0	0.206104	0.559341	0	0.984625	-0.00696816	0	0.345982	-0.428654	0	0.68106	0.130687	0	0.517404	-0.137655	0
271	Formyl-5-hydroxykynurenamine	C10H12N2O3	+	209.092	-3.2	7.55	0.53	8	103148	104928	143201	186855	215440	94275	51604	51714	-	-	-	0.0641536	-0.805496	4	8.78225e-07	2.90624	503271	0.128979	0.659541	1	0.0641536	0.805496	4	0.00132631	3.71173	967	0.0102343	1.46504	33	8.78225e-07	-2.90624	503271	0.00132631	-3.71173	967	0.0215874	-2.2467	9	0.128979	-0.659541	1
272	Formylanthranilate	C8H7NO3	+	166.05	-2.2	7.14	0.29	11	7839216	5043106	51988260	59349860	60132172	41991916	53592776	43074748	29124226	17542486	27428266	0.000717057	-3.14953	393516	0.0315356	-1.93902	1893	0.00388119	-2.84312	48681	0.000717057	3.14953	393516	0.00187245	1.21051	50583	0.0727268	0.306413	879	0.0315356	1.93902	1893	0.00187245	-1.21051	50583	0.0141137	-0.904098	4702	0.00388119	2.84312	48681
273	Formyl-N-acetyl-5-methoxykynurenamine	C13H16N2O4	-	263.104	-2.4	2.77	0.88	0	-	-	-	-	-	-	-	-	-	-	-	NA	0	0	NA	0	0	NA	0	0	NA	0	0	NA	0	0	NA	0	0	NA	0	0	NA	0	0	NA	0	0	NA	0	0
274	Fumarate	C4H4O4	-	115.004	-13.8	13.25	0.57	8	1255730	586897	635746	232039	277929	1059670	331538	2172501	-	-	-	0.168772	1.27048	9	0.0467193	3.12198	96	0.740752	-0.366653	2	0.168772	-1.27048	9	0.0965157	1.8515	9	0.21687	-1.63713	11	0.0467193	-3.12198	96	0.0965157	-1.8515	9	0.113309	-3.48864	64	0.740752	0.366653	2
275	gamma-L-Glutamyl-L-cysteine	C8H14N2O5S	+	251.07	-1.7	8.76	0.06	5	194057	149339	295932	142964	177908	-	-	-	-	-	-	0.622683	-0.259976	0	0.0023251	4.1018	671	0.0023251	4.1018	671	0.622683	0.259976	0	0.013406	4.36178	165	0.013406	4.36178	165	0.0023251	-4.1018	671	0.013406	-4.36178	165	NA	0	0	0.0023251	-4.1018	671
276	GDP	C10H15N5O11P2	+	444.032	-1.4	15.42	0.87	5	99482	28699	42502	51887	64464	-	-	-	-	-	-	0.713823	0.275453	0	0.187584	1.73668	1	0.187584	1.73668	1	0.713823	-0.275453	0	0.00608683	1.46122	16	0.00608683	1.46122	16	0.187584	-1.73668	1	0.00608683	-1.46122	16	NA	0	0	0.187584	-1.73668	1
277	GDP-4-dehydro-6-deoxy-D-mannose	C16H23N5O15P2	+	588.074	8.1	7.58	0.01	1	-	-	27748	-	-	-	-	-	-	-	-	0.495025	-0.670478	0	NA	0	0	NA	0	0	0.495025	0.670478	0	0.373901	0.670478	0	0.373901	0.670478	0	NA	0	0	0.373901	-0.670478	0	NA	0	0	NA	0	0
278	GDP-L-fucose	C16H25N5O15P2	+	590.09	-8.3	14.71	0.06	2	16205	10140	-	-	-	-	-	-	-	-	-	0.255047	0.397529	0	0.255047	0.397529	0	0.255047	0.397529	0	0.255047	-0.397529	0	NA	0	0	NA	0	0	0.255047	-0.397529	0	NA	0	0	NA	0	0	0.255047	-0.397529	0
279	GDP-mannose	C16H25N5O16P2	+	606.084	-3.4	15.39	0.11	5	258690	117488	148080	91683	149688	-	-	-	-	-	-	0.38977	0.534936	1	0.0436481	4.07792	39	0.0436481	4.07792	39	0.38977	-0.534936	1	0.00339614	3.54298	242	0.00339614	3.54298	242	0.0436481	-4.07792	39	0.00339614	-3.54298	242	NA	0	0	0.0436481	-4.07792	39
280	Geranyl diphosphate	C10H20O7P2	+	315.076	14.6	3.45	0.1	1	-	-	51012	-	-	-	-	-	-	-	-	0.495025	-1.00895	0	NA	0	0	NA	0	0	0.495025	1.00895	0	0.373901	1.00895	0	0.373901	1.00895	0	NA	0	0	0.373901	-1.00895	0	NA	0	0	NA	0	0
281	Geranylgeranyl diphosphate	C20H36O7P2	+	451.201	5.5	2.84	0.2	5	-	-	42811	-	33349	81369	-	-	26173	-	41883	0.233688	-1.52206	0	0.270384	-1.37955	0	0.495025	-1.75658	0	0.233688	1.52206	0	0.850166	0.142509	0	0.853298	-0.234526	0	0.270384	1.37955	0	0.850166	-0.142509	0	0.775827	-0.377035	0	0.495025	1.75658	0
282	Glutaryl-CoA	C26H42N7O19P3S	-	880.14	-13.7	6.54	0.3	2	26845	-	-	24089	-	-	-	-	-	-	-	0.698207	0.326013	0	0.272228	0.881469	0	0.272228	0.881469	0	0.698207	-0.326013	0	0.373901	0.555456	0	0.373901	0.555456	0	0.272228	-0.881469	0	0.373901	-0.555456	0	NA	0	0	0.272228	-0.881469	0
283	Glutathione	C10H17N3O6S	+	308.091	-3.8	16.34	0.14	8	123971	89029	27402	595329	216239	19267	14825	38996	-	-	-	0.481318	-1.3928	1	0.0050836	3.41278	122	0.0147447	2.12811	19	0.481318	1.3928	1	0.181643	4.80558	22	0.201391	3.52091	9	0.0050836	-3.41278	122	0.181643	-4.80558	22	0.125305	-1.28467	0	0.0147447	-2.12811	19
284	Glutathione disulfide	C20H32N6O12S2	+	613.159	-15.1	9.5	0.38	2	-	-	-	22499	-	-	-	15459	-	-	-	0.495025	-0.502466	0	NA	0	0	0.495025	-0.241189	0	0.495025	0.502466	0	0.373901	0.502466	0	0.632963	0.261277	0	NA	0	0	0.373901	-0.502466	0	0.373901	-0.241189	0	0.495025	0.241189	0
285	Glycerol	C3H8O3	-	91.0401	-15	0.16	0.09	0	-	-	-	-	-	-	-	-	-	-	-	NA	0	0	NA	0	0	NA	0	0	NA	0	0	NA	0	0	NA	0	0	NA	0	0	NA	0	0	NA	0	0	NA	0	0
286	Glycerone	C3H6O3	-	89.0244	-14.8	0.01	0.3	2	-	2890231	-	-	-	-	-	-	-	3351583	-	0.272228	0.127526	10	0.865636	-0.0419573	3	0.272228	0.127526	10	0.272228	-0.127526	10	0.373901	-0.169483	8	NA	0	0	0.865636	0.0419573	3	0.373901	0.169483	8	0.373901	0.169483	8	0.272228	-0.127526	10
287	Glycerone phosphate	C3H7O6P	-	168.991	-10.3	12.49	0.3	3	175319	57122	-	-	70251	-	-	-	-	-	-	0.190537	1.94981	1	0.0948983	3.53879	8	0.0948983	3.53879	8	0.190537	-1.94981	1	0.373901	1.58898	0	0.373901	1.58898	0	0.0948983	-3.53879	8	0.373901	-1.58898	0	NA	0	0	0.0948983	-3.53879	8
288	Glycine	C2H5NO2	+	76.0393	5.2	12.04	0.11	11	19583386	20644350	16335498	15634202	15157622	5941982	4360148	5262631	1185238	1130371	1432118	0.00504357	0.356589	4547	2.31259e-05	4.00907	7436785	0.000236908	1.95487	207024	0.00504357	-0.356589	4547	2.15748e-06	3.65248	49421056	5.13242e-05	1.59828	616409	2.31259e-05	-4.00907	7436785	2.15748e-06	-3.65248	49421056	0.00108602	-2.0542	12309	0.000236908	-1.95487	207024
289	Glycogen	C24H42O21	-	665.215	-7.6	14.3	0.48	8	35888	13592	157815	140433	291793	-	-	-	72654	47777	41116	0.0701399	-2.99094	13	0.146095	-1.12207	1	0.174177	1.30685	0	0.0701399	2.99094	13	0.0428804	1.86886	11	0.0174854	4.29778	116	0.146095	1.12207	1	0.0428804	-1.86886	11	0.0102687	2.42892	17	0.174177	-1.30685	0
290	Glyoxylate	C2H2O3	-	72.9931	-15.3	7.54	0.95	1	-	-	-	-	113883	-	-	-	-	-	-	0.495025	-0.110957	0	NA	0	0	NA	0	0	0.495025	0.110957	0	0.373901	0.110957	0	0.373901	0.110957	0	NA	0	0	0.373901	-0.110957	0	NA	0	0	NA	0	0
291	GMP	C10H14N5O8P	+	364.065	-4.3	12.91	0.2	4	-	-	-	-	-	381506	140563	1709348	-	-	29292	NA	0	0	0.495025	-0.209208	0	0.333665	-5.22036	43	NA	0	0	0.373901	-0.209208	0	0.211958	-5.22036	67	0.495025	0.209208	0	0.373901	0.209208	0	0.21357	-5.01115	58	0.333665	5.22036	43
292	GTP	C10H16N5O14P3	+	523.998	-2.7	9.54	0.43	1	17213	-	-	-	-	-	-	-	-	-	-	0.272228	0.381417	0	0.272228	0.381417	0	0.272228	0.381417	0	0.272228	-0.381417	0	NA	0	0	NA	0	0	0.272228	-0.381417	0	NA	0	0	NA	0	0	0.272228	-0.381417	0
293	Guanine	C5H5N5O	+	152.057	-3.2	8.79	0.21	11	6216151	4511332	7580861	8909433	11461825	20002866	13689562	23076612	201389	243761	206080	0.090173	-0.796684	141	0.00393612	4.62696	17517	0.0332921	-1.81883	1287	0.090173	0.796684	141	0.00132964	5.42365	153890	0.0324601	-1.02215	883	0.00393612	-4.62696	17517	0.00132964	-5.42365	153890	0.002484	-6.44579	335846	0.0332921	1.81883	1287
294	Guanosine	C10H13N5O5	+	284.099	-4.4	9.12	0.17	11	4625437	2152486	5274090	3395594	2522384	6146974	4648144	6278244	90964	86836	98048	0.822362	-0.138599	5	0.0373554	5.20386	1717	0.137286	-0.74787	56	0.822362	0.138599	5	0.0109719	5.34246	7068	0.112187	-0.609271	64	0.0373554	-5.20386	1717	0.0109719	-5.34246	7068	0.00043093	-5.95173	415308	0.137286	0.74787	56
295	Heme	C34H32FeN4O4	-	615.17	-3	1.48	0.22	0	-	-	-	-	-	-	-	-	-	-	-	NA	0	0	NA	0	0	NA	0	0	NA	0	0	NA	0	0	NA	0	0	NA	0	0	NA	0	0	NA	0	0	NA	0	0
296	Hexadecanoic acid	C16H32O2	-	255.233	-4.5	2.82	0.2	3	-	-	-	-	2777581	29232522	-	23738880	-	-	-	0.495025	-0.0204042	5	NA	0	0	0.226027	-2.7995	327	0.495025	0.0204042	5	0.373901	0.0204042	7	0.122035	-2.7791	598	NA	0	0	0.373901	-0.0204042	7	0.121378	-2.7995	608	0.226027	2.7995	327
297	Hexanoyl-CoA	C27H46N7O17P3S	+	866.196	11.3	20.92	0.68	1	-	-	-	12883	-	-	-	-	-	-	-	0.495025	-0.0812227	0	NA	0	0	NA	0	0	0.495025	0.0812227	0	0.373901	0.0812227	0	0.373901	0.0812227	0	NA	0	0	0.373901	-0.0812227	0	NA	0	0	NA	0	0
298	Hydroxymethylbilane	C40H46N4O17	+	855.293	9.9	27.49	0.41	1	-	-	27568	-	-	-	-	-	-	-	-	0.495025	-0.665029	0	NA	0	0	NA	0	0	0.495025	0.665029	0	0.373901	0.665029	0	0.373901	0.665029	0	NA	0	0	0.373901	-0.665029	0	NA	0	0	NA	0	0
299	Hydroxyproline	C5H9NO3	+	132.065	-3.2	10.87	0.29	9	464184416	495949504	52545432	55990288	54523484	13866190	12253689	11612597	-	24534990	-	4.81304e-05	3.1428	49035573	7.35637e-05	5.60298	161851907	3.60141e-05	5.25432	261059188	4.81304e-05	-3.1428	49035573	0.00385167	2.46018	45883	4.09423e-06	2.11152	35322546	7.35637e-05	-5.60298	161851907	0.00385167	-2.46018	45883	0.732276	-0.348659	20	3.60141e-05	-5.25432	261059188
300	Hydroxypyruvate	C3H4O4	-	103.004	-14.4	12.98	0.14	9	2702116	2925160	17533158	16925484	15791513	-	187589	538280	-	399861	310898	0.000236689	-2.57366	246031	0.000210808	3.23368	69448	0.000704064	3.20958	20483	0.000236689	2.57366	246031	5.68526e-06	5.80733	83966119	6.1242e-06	5.78324	76679871	0.000210808	-3.23368	69448	5.68526e-06	-5.80733	83966119	0.971478	-0.0240908	0	0.000704064	-3.20958	20483
301	Hypoxanthine	C5H4N4O	+	137.046	-3.6	7.1	0.19	11	476246944	462997472	462192384	420833312	422043200	83618280	62190764	103161408	5432428	4241000	4756650	0.15387	0.110409	3173	2.67507e-06	6.60931	8657851573	0.000156863	2.50049	9967645	0.15387	-0.110409	3173	5.9411e-06	6.4989	3347768276	4.04666e-05	2.39008	33550563	2.67507e-06	-6.60931	8657851573	5.9411e-06	-6.4989	3347768276	0.0027229	-4.10882	278172	0.000156863	-2.50049	9967645
302	IDP	C10H14N4O11P2	+	429.021	4.4	8.68	0.16	2	-	-	20030	10871	-	-	-	-	-	-	-	0.444877	-0.447174	0	NA	0	0	NA	0	0	0.444877	0.447174	0	0.320643	0.447174	0	0.320643	0.447174	0	NA	0	0	0.320643	-0.447174	0	NA	0	0	NA	0	0
303	Imidazole-4-acetaldehyde	C5H6N2O	-	109.041	-15	3.06	0.83	0	-	-	-	-	-	-	-	-	-	-	-	NA	0	0	NA	0	0	NA	0	0	NA	0	0	NA	0	0	NA	0	0	NA	0	0	NA	0	0	NA	0	0	NA	0	0
304	Imidazole-4-acetate	C5H6N2O2	+	127.05	-2.4	8.75	0.82	5	8783126	7943228	5703011	6918542	9598112	-	-	-	-	-	-	0.57331	0.175248	16	0.000118703	6.58364	3413948	0.000118703	6.58364	3413948	0.57331	-0.175248	16	0.00313025	6.40839	101673	0.00313025	6.40839	101673	0.000118703	-6.58364	3413948	0.00313025	-6.40839	101673	NA	0	0	0.000118703	-6.58364	3413948
305	IMP	C10H13N4O8P	+	349.054	-4.5	12.69	0.65	6	631156	625548	352280	380431	469315	-	-	-	-	47614	-	0.0154337	0.649139	52	1.87273e-07	3.79347	24939554	1.00978e-07	3.83052	47374992	0.0154337	-0.649139	52	0.000546945	3.14433	3605	0.000539041	3.18138	3743	1.87273e-07	-3.79347	24939554	0.000546945	-3.14433	3605	0.373901	0.037046	0	1.00978e-07	-3.83052	47374992
306	Indole-3-acetaldehyde	C10H9NO	+	160.076	-3.1	3.8	0.62	11	186262	173841	238876	285286	309408	79051	76447	73612	57259	77202	88485	0.0365887	-0.625931	10	0.00360019	1.27668	86	0.000253206	1.23733	1194	0.0365887	0.625931	10	0.000844564	1.90261	780	0.000630461	1.86326	1022	0.00360019	-1.27668	86	0.000844564	-1.90261	780	0.835325	-0.0393461	0	0.000253206	-1.23733	1194
307	Indole-3-acetate	C10H9NO2	+	176.071	-2.9	3.34	0.55	11	664430	855483	2218352	2638773	3553474	868322	741884	1036709	1044497	705922	807570	0.0284223	-1.88326	231	0.574937	-0.166059	2	0.419971	-0.215361	2	0.0284223	1.88326	231	0.00866716	1.7172	694	0.00887809	1.6679	660	0.574937	0.166059	2	0.00866716	-1.7172	694	0.832994	-0.0493018	1	0.419971	0.215361	2
308	Inosine	C10H12N4O5	+	269.088	-4.6	7.76	0.31	11	126335112	99624216	213819952	177716672	172782608	30503170	21270268	26774178	2362225	1570825	2329288	0.030645	-0.735486	8179	0.00155273	5.75818	2005449	0.00374816	2.10939	80105	0.030645	0.735486	8179	0.000135992	6.49367	63014461	0.000254421	2.84487	3025586	0.00155273	-5.75818	2005449	0.000135992	-6.49367	63014461	0.000864446	-3.64879	205095	0.00374816	-2.10939	80105
309	Inositol 1-phosphate	C6H13O9P	-	259.022	-4.8	13.99	0.09	7	13248660	6775914	8517686	5067621	5726525	-	-	674002	-	673201	-	0.287553	0.637249	44	0.0304004	3.91915	2656	0.0304026	3.91857	2655	0.287553	-0.637249	44	0.00546455	3.2819	6318	0.00546549	3.28132	6314	0.0304004	-3.91915	2656	0.00546455	-3.2819	6318	0.975659	-0.000581897	1	0.0304026	-3.91857	2655
310	Isocitrate	C6H8O7	-	191.02	-7.5	8.75	0.45	6	2169271	3650759	21115624	20300404	8561705	-	-	107109	-	-	-	0.079579	-2.51722	704	0.0141377	5.53687	4881	0.0143659	5.23087	3905	0.079579	2.51722	704	0.0149475	8.05409	148666	0.0149926	7.7481	119998	0.0141377	-5.53687	4881	0.0149475	-8.05409	148666	0.373901	-0.305993	0	0.0143659	-5.23087	3905
311	Isopentenyl diphosphate	C5H12O7P2	+	247.013	-2	10.87	0.46	1	-	-	-	69846	-	-	-	-	-	-	-	0.495025	-1.58249	0	NA	0	0	NA	0	0	0.495025	1.58249	0	0.373901	1.58249	0	0.373901	1.58249	0	NA	0	0	0.373901	-1.58249	0	NA	0	0	NA	0	0
312	ITP	C10H15N4O14P3	-	506.973	3.4	4.56	0.03	1	-	-	-	-	-	-	26265	-	-	-	-	NA	0	0	NA	0	0	0.495025	-0.624959	0	NA	0	0	NA	0	0	0.373901	-0.624959	0	NA	0	0	NA	0	0	0.373901	-0.624959	0	0.495025	0.624959	0
313	L-1-Pyrroline-3-hydroxy-5-carboxylate	C5H7NO3	+	130.05	-2.8	11.52	0.5	9	289853920	306632960	305224896	293172576	321695104	23976596	19825440	17837012	-	25661012	-	0.54336	-0.0403261	572	0.00016696	4.99598	29394697	3.05623e-05	3.85954	75704963	0.54336	0.0403261	572	1.38218e-05	5.0363	375171142	4.56208e-06	3.89986	535370674	0.00016696	-4.99598	29394697	1.38218e-05	-5.0363	375171142	0.251167	-1.13644	131	3.05623e-05	-3.85954	75704963
314	L-2-Amino-3-oxobutanoic acid	C4H7NO3	+	118.05	-12.4	3.01	0.82	11	954499	868686	1893089	2142234	460591	1580757	2356049	2316810	4069998	5671026	2937602	0.449796	-0.717191	4	0.0479816	-2.2129	248	0.0371267	-1.19327	92	0.449796	0.717191	4	0.0454747	-1.49571	178	0.37066	-0.476076	7	0.0479816	2.2129	248	0.0454747	1.49571	178	0.0617199	1.01964	104	0.0371267	1.19327	92
315	L-3-Amino-isobutanoate	C4H9NO2	+	104.071	0.9	11.86	0.49	8	18408880	21177804	80214072	88426152	94042976	7534082	5471098	7764243	-	-	-	0.00102389	-2.14527	231914	0.000458954	3.01203	195516	0.00270331	1.51552	14128	0.00102389	2.14527	231914	2.92947e-05	5.15731	54827351	3.87001e-05	3.66079	15439213	0.000458954	-3.01203	195516	2.92947e-05	-5.15731	54827351	0.00358748	-1.49651	3687	0.00270331	-1.51552	14128
316	L-4-Hydroxyglutamate semialdehyde	C5H9NO4	+	148.06	-4.3	11.75	0.19	9	479019424	461691136	261841120	163616352	214938096	81916328	52491776	68959992	-	16219775	-	0.00621528	1.13975	121213	1.19109e-05	5.7674	1095251744	6.97874e-05	2.79462	26752013	0.00621528	-1.13975	121213	0.00201637	4.62765	1361474	0.00793508	1.65487	55806	1.19109e-05	-5.7674	1095251744	0.00201637	-4.62765	1361474	0.00315738	-2.97278	95010	6.97874e-05	-2.79462	26752013
317	Lactose	C12H22O11	-	341.109	-4.8	12.44	0.88	11	294697728	282195552	393028032	465319424	494527072	549208	486781	1055273	3305020	2278310	2580754	0.0255347	-0.644689	22636	9.6558e-06	6.72783	1598102035	9.38842e-06	8.69275	6371909988	0.0255347	0.644689	22636	0.000119496	7.37252	314569830	0.000117377	9.33744	1244636872	9.6558e-06	-6.72783	1598102035	0.000119496	-7.37252	314569830	0.00461884	1.96492	1445	9.38842e-06	-8.69275	6371909988
318	L-Alanine	C3H7NO2	+	90.055	1.6	11.24	0.15	11	60964112	55875068	88900512	88261016	103269304	35133704	21054246	30135908	3007352	2726451	2915061	0.0130501	-0.678158	9312	8.7877e-05	4.34083	7067960	0.0134679	1.02166	6572	0.0130501	0.678158	9312	5.03779e-05	5.01899	31009363	0.000539487	1.69981	368077	8.7877e-05	-4.34083	7067960	5.03779e-05	-5.01899	31009363	0.00327971	-3.31918	48171	0.0134679	-1.02166	6572
319	L-Arginine	C6H14N4O2	+	175.119	-4.3	20.36	0.09	8	176848672	137025856	120841856	118600920	145225632	32946218	-	49125860	-	45381280	-	0.218006	0.291535	800	0.00498613	2.18319	87210	0.00568433	2.0818	72243	0.218006	-0.291535	800	0.00075161	1.89165	401808	0.000968692	1.79026	295097	0.00498613	-2.18319	87210	0.00075161	-1.89165	401808	0.773624	-0.101391	50	0.00568433	-2.0818	72243
320	L-Arginine phosphate	C6H15N4O5P	-	253.071	-12.4	7.68	0.31	0	-	-	-	-	-	-	-	-	-	-	-	NA	0	0	NA	0	0	NA	0	0	NA	0	0	NA	0	0	NA	0	0	NA	0	0	NA	0	0	NA	0	0	NA	0	0
321	L-Asparagine	C4H8N2O3	+	133.061	-3.5	11.72	0.16	9	60744416	68403136	76117312	70936392	74254992	16832550	10637577	13959077	-	6509558	-	0.0764954	-0.192077	1033	0.000505029	4.63262	1649799	0.000819434	2.22526	223641	0.0764954	0.192077	1033	8.66472e-06	4.8247	124891301	1.38974e-05	2.41734	16831796	0.000505029	-4.63262	1649799	8.66472e-06	-4.8247	124891301	0.0133697	-2.40736	3256	0.000819434	-2.22526	223641
322	L-Aspartate	C4H7NO4	-	132.03	-11.6	12.04	0.64	9	6173853	5488656	7084160	5238946	6843810	7479582	3260280	5678482	-	559681	-	0.531152	-0.131778	13	0.000263934	3.72036	156651	0.83697	0.0915321	7	0.531152	0.131778	13	0.000517559	3.85214	95307	0.535339	0.22331	13	0.000263934	-3.72036	156651	0.000517559	-3.85214	95307	0.0147246	-3.62883	2485	0.83697	-0.0915321	7
323	L-Aspartate 4-semialdehyde	C4H7NO3	+	118.05	-12.4	3.01	0.82	11	954499	868686	1893089	2142234	460591	1580757	2356049	2316810	4069998	5671026	2937602	0.449796	-0.717191	4	0.0479816	-2.2129	248	0.0371267	-1.19327	92	0.449796	0.717191	4	0.0454747	-1.49571	178	0.37066	-0.476076	7	0.0479816	2.2129	248	0.0454747	1.49571	178	0.0617199	1.01964	104	0.0371267	1.19327	92
324	Lauroyl-CoA	C33H58N7O17P3S	+	950.29	5.6	12.06	0.89	1	-	15552	-	-	-	-	-	-	-	-	-	0.272228	0.298462	0	0.272228	0.298462	0	0.272228	0.298462	0	0.272228	-0.298462	0	NA	0	0	NA	0	0	0.272228	-0.298462	0	NA	0	0	NA	0	0	0.272228	-0.298462	0
325	L-Carnitine	C7H15NO3	+	162.113	-4.1	9.88	0.61	11	655710656	665838912	789374400	956261696	1065051904	26619174	18064474	18814020	5709980	4615216	6718686	0.075939	-0.50373	14915	4.49403e-07	6.8618	86240557716	1.16357e-06	4.96435	9148304635	0.075939	0.50373	14915	0.000313941	7.36553	247561161	0.000335895	5.46808	63126988	4.49403e-07	-6.8618	86240557716	0.000313941	-7.36553	247561161	0.0052362	-1.89745	9551	1.16357e-06	-4.96435	9148304635
326	L-Cystathionine	C7H14N2O4S	+	223.075	-7.2	3.1	0.15	11	68473	138746	290527	372560	236309	194371	117207	108487	136157	121554	174943	0.041991	-1.53284	14	0.309785	-0.477095	1	0.467691	-0.434494	0	0.041991	1.53284	14	0.0218761	1.05574	21	0.0293243	1.09834	16	0.309785	0.477095	1	0.0218761	-1.05574	21	0.900768	0.0426012	0	0.467691	0.434494	0
327	L-Cysteate	C3H7NO5S	-	167.997	-13.8	4.94	0.09	3	-	-	48243	59912	89577	-	-	-	-	-	-	0.0389158	-2.72051	6	NA	0	0	NA	0	0	0.0389158	2.72051	6	0.0104623	2.72051	24	0.0104623	2.72051	24	NA	0	0	0.0104623	-2.72051	24	NA	0	0	NA	0	0
328	L-Cysteine	C3H7NO2S	+	122.027	1.4	3.1	0.07	1	-	-	-	-	100496	-	-	-	-	-	-	0.495025	-1.34938	0	NA	0	0	NA	0	0	0.495025	1.34938	0	0.373901	1.34938	0	0.373901	1.34938	0	NA	0	0	0.373901	-1.34938	0	NA	0	0	NA	0	0
329	L-Cystine	C6H12N2O4S2	+	241.031	-4.3	12.89	0.13	8	18397748	14451596	15755165	3723200	14423245	1100565	-	846355	-	578894	-	0.391598	0.539473	51	0.00168004	5.14707	178097	0.00186003	4.3884	96882	0.391598	-0.539473	51	0.0466107	4.6076	3077	0.0509738	3.84893	1708	0.00168004	-5.14707	178097	0.0466107	-4.6076	3077	0.203096	-0.75867	5	0.00186003	-4.3884	96882
330	Leukotriene A4	C20H30O3	+	319.227	-9.6	2.94	0.46	11	131164	119197	229507	184971	251501	56770	124763	66181	213928	226409	222721	0.0325843	-0.826504	9	0.000688259	-0.820163	444	0.223125	0.600297	1	0.0325843	0.826504	9	0.963353	0.00634161	0	0.00849963	1.4268	48	0.000688259	0.820163	444	0.963353	-0.00634161	0	0.00303864	1.42046	134	0.223125	-0.600297	1
331	Leukotriene B4	C20H32O4	+	337.237	-10.2	2.85	0.45	10	73767	86631	59277	207457	165580	107570	142868	225447	45330	171533	-	0.344866	-0.845461	1	0.981322	0.0281283	0	0.182152	-0.983994	1	0.344866	0.845461	1	0.367545	0.873589	1	0.809024	-0.138533	0	0.981322	-0.0281283	0	0.367545	-0.873589	1	0.244056	-1.01212	1	0.182152	0.983994	1
332	L-Glutamate	C5H9NO4	+	148.06	-4.3	11.75	0.19	9	479019424	461691136	261841120	163616352	214938096	81916328	52491776	68959992	-	16219775	-	0.00621528	1.13975	121213	1.19109e-05	5.7674	1095251744	6.97874e-05	2.79462	26752013	0.00621528	-1.13975	121213	0.00201637	4.62765	1361474	0.00793508	1.65487	55806	1.19109e-05	-5.7674	1095251744	0.00201637	-4.62765	1361474	0.00315738	-2.97278	95010	6.97874e-05	-2.79462	26752013
333	L-Glutamate 5-semialdehyde	C5H9NO3	+	132.065	-3.2	10.87	0.29	9	464184416	495949504	52545432	55990288	54523484	13866190	12253689	11612597	-	24534990	-	4.81304e-05	3.1428	49035573	7.35637e-05	5.60298	161851907	3.60141e-05	5.25432	261059188	4.81304e-05	-3.1428	49035573	0.00385167	2.46018	45883	4.09423e-06	2.11152	35322546	7.35637e-05	-5.60298	161851907	0.00385167	-2.46018	45883	0.732276	-0.348659	20	3.60141e-05	-5.25432	261059188
334	L-Glutamine	C5H10N2O3	+	147.076	-4.2	11.48	0.2	9	901045312	952788608	947214208	987196032	1009144000	87331064	73883216	65804432	-	94757432	-	0.171466	-0.0820847	5890	0.000247253	4.72728	51524901	3.2652e-05	3.61459	188054712	0.171466	0.0820847	5890	1.10697e-05	4.80937	1286968238	1.20535e-06	3.69668	5684408716	0.000247253	-4.72728	51524901	1.10697e-05	-4.80937	1286968238	0.253613	-1.11269	472	3.2652e-05	-3.61459	188054712
335	L-Histidine	C6H9N3O2	+	156.077	-4.2	10.81	0.47	11	39461648	37590288	36945784	35141152	34992312	21342900	14912947	20293546	4587594	12418823	5817270	0.0770345	0.110187	520	0.00238762	2.34026	48923	0.00513254	1.03128	11424	0.0770345	-0.110187	520	0.000363921	2.23008	279113	0.00128321	0.921095	40243	0.00238762	-2.34026	48923	0.000363921	-2.23008	279113	0.0232349	-1.30898	1411	0.00513254	-1.03128	11424
336	L-Homocysteine	C4H9NO2S	+	136.043	-3.5	6.44	0.96	6	29999	44151	196000	148122	181044	-	-	-	-	-	18997	0.00539057	-2.23929	93	0.0329404	1.23653	2	0.0223613	1.39444	3	0.00539057	2.23929	93	0.000362906	3.47582	2925	0.000339904	3.63374	3454	0.0329404	-1.23653	2	0.000362906	-3.47582	2925	0.373901	0.157914	0	0.0223613	-1.39444	3
337	L-Homoserine	C4H9NO3	+	120.066	-2.7	10.8	0.18	11	55611616	58430072	73136184	62241376	73122960	29380328	17331338	26244038	1425329	6888002	1647822	0.0804543	-0.285527	958	0.000229461	4.10207	2257983	0.00637661	1.22943	14955	0.0804543	0.285527	958	8.16596e-05	4.38759	9332852	0.000908982	1.51496	147486	0.000229461	-4.10207	2257983	8.16596e-05	-4.38759	9332852	0.0064484	-2.87264	15696	0.00637661	-1.22943	14955
338	Linoleate	C18H32O2	-	279.233	-4.5	2.82	0.11	11	2586796	962399	2631298	1458994	3501172	57565976	21800990	56707712	6219128	2286334	7535417	0.49454	-0.511924	6	0.191136	-1.59123	56	0.0644033	-4.6758	9353	0.49454	0.511924	6	0.169772	-1.0793	49	0.0221466	-4.16388	19380	0.191136	1.59123	56	0.169772	1.0793	49	0.0281433	-3.08457	7642	0.0644033	4.6758	9353
339	L-Isoleucine	C6H13NO2	+	132.102	-3.1	7.52	0.51	11	289896544	319052576	156028464	219933424	143542336	79731480	41944112	49912520	3657121	19169060	3686875	0.0271051	0.814149	15492	0.000175685	5.10651	30720270	0.000890507	2.41233	1081013	0.0271051	-0.814149	15492	0.00246212	4.29236	724228	0.0116131	1.59819	30029	0.000175685	-5.10651	30720270	0.00246212	-4.29236	724228	0.0185256	-2.69417	11534	0.000890507	-2.41233	1081013
340	L-Kynurenine	C10H12N2O3	+	209.092	-3.2	7.55	0.53	8	103148	104928	143201	186855	215440	94275	51604	51714	-	-	-	0.0641536	-0.805496	4	8.78225e-07	2.90624	503271	0.128979	0.659541	1	0.0641536	0.805496	4	0.00132631	3.71173	967	0.0102343	1.46504	33	8.78225e-07	-2.90624	503271	0.00132631	-3.71173	967	0.0215874	-2.2467	9	0.128979	-0.659541	1
341	LL-2,6-Diaminoheptanedioate	C7H14N2O4	+	191.103	-3.3	10.61	0.94	5	1912966	1952523	1320556	1881196	1658710	-	-	-	-	-	-	0.23496	0.25452	9	1.02711e-06	5.96052	59530693	1.02711e-06	5.96052	59530693	0.23496	-0.25452	9	0.00061984	5.706	69529	0.00061984	5.706	69529	1.02711e-06	-5.96052	59530693	0.00061984	-5.706	69529	NA	0	0	1.02711e-06	-5.96052	59530693
342	L-Leucine	C6H13NO2	+	132.102	-3.1	7.52	0.51	11	289896544	319052576	156028464	219933424	143542336	79731480	41944112	49912520	3657121	19169060	3686875	0.0271051	0.814149	15492	0.000175685	5.10651	30720270	0.000890507	2.41233	1081013	0.0271051	-0.814149	15492	0.00246212	4.29236	724228	0.0116131	1.59819	30029	0.000175685	-5.10651	30720270	0.00246212	-4.29236	724228	0.0185256	-2.69417	11534	0.000890507	-2.41233	1081013
343	L-Lysine	C6H14N2O2	+	147.113	-4.1	19.34	0.13	10	9847062	6942313	13977979	12518103	18418734	5390148	3417841	7200906	-	1312559	1326352	0.0806611	-0.83468	258	0.00714702	2.81398	4717	0.183872	0.653637	59	0.0806611	0.83468	258	0.00149673	3.64866	67728	0.0098498	1.48832	2892	0.00714702	-2.81398	4717	0.00149673	-3.64866	67728	0.0196513	-2.16034	743	0.183872	-0.653637	59
344	L-Methionine	C5H11NO2S	+	150.058	-4.2	8.3	0.24	11	56541512	54989876	40377472	47056964	58278028	42330972	18187212	19993460	187884	2606282	218526	0.36568	0.199288	164	2.23012e-05	5.79522	70679686	0.0634675	1.05514	1352	0.36568	-0.199288	164	0.000842908	5.59593	1422313	0.0809052	0.855855	843	2.23012e-05	-5.79522	70679686	0.000842908	-5.59593	1422313	0.0296673	-4.74007	12540	0.0634675	-1.05514	1352
345	L-Phenylalanine	C9H11NO2	+	166.086	-4.5	6.99	0.22	11	96657400	114817832	141016112	173053312	172539168	34399216	16178082	20385044	1174649	5192112	1209354	0.0342743	-0.617311	5996	0.000672019	5.38785	3372661	0.00358675	2.16033	80630	0.0342743	0.617311	5996	0.000116492	6.00516	45412294	0.000315252	2.77764	2021356	0.000672019	-5.38785	3372661	0.000116492	-6.00516	45412294	0.0203278	-3.22752	6031	0.00358675	-2.16033	80630
346	L-Proline	C5H9NO2	+	116.071	-0.9	9.37	0.14	11	1056267264	1118616576	555250176	681355072	688733888	79482864	48546464	64871936	22598048	50961616	22546076	0.00518583	0.760788	282502	3.38641e-05	5.08513	561078966	3.58646e-05	4.07997	271551393	0.00518583	-0.760788	282502	0.000162009	4.32435	41660983	0.000198629	3.31918	17739999	3.38641e-05	-5.08513	561078966	0.000162009	-4.32435	41660983	0.068278	-1.00517	1416	3.58646e-05	-4.07997	271551393
347	L-Serine	C3H7NO3	+	106.05	0.3	12.14	0.09	11	38226716	41376320	29810008	31498196	34206660	17338918	10787217	13586386	1051243	3280598	1257400	0.0293767	0.322061	1524	0.00013293	4.41706	3347979	0.002449	1.51731	31387	0.0293767	-0.322061	1524	3.36781e-05	4.095	8550425	0.00143439	1.19524	36511	0.00013293	-4.41706	3347979	3.36781e-05	-4.095	8550425	0.00402627	-2.89976	14613	0.002449	-1.51731	31387
348	L-Threonine	C4H9NO3	+	120.066	-2.7	10.8	0.18	11	55611616	58430072	73136184	62241376	73122960	29380328	17331338	26244038	1425329	6888002	1647822	0.0804543	-0.285527	958	0.000229461	4.10207	2257983	0.00637661	1.22943	14955	0.0804543	0.285527	958	8.16596e-05	4.38759	9332852	0.000908982	1.51496	147486	0.000229461	-4.10207	2257983	8.16596e-05	-4.38759	9332852	0.0064484	-2.87264	15696	0.00637661	-1.22943	14955
349	L-Tryptophan	C11H12N2O2	+	205.097	-4.7	8.3	0.23	11	27573224	30602092	16795084	20367594	31884198	4198829	1019378	1118537	111815	289168	68656	0.385022	0.337794	86	0.000131431	7.53767	20671854	0.000600935	3.78356	357487	0.385022	-0.337794	86	0.00738266	7.19988	230730	0.0110288	3.44576	12413	0.000131431	-7.53767	20671854	0.00738266	-7.19988	230730	0.13484	-3.75412	114	0.000600935	-3.78356	357487
350	L-Tyrosine	C9H11NO3	+	182.081	-3.7	9.56	0.16	11	96301712	96705768	112650440	124060904	136407216	22559944	11579392	13321823	575488	4050723	634571	0.0514046	-0.366015	2769	8.57847e-06	5.7822	315166701	0.000354146	2.6088	967360	0.0514046	0.366015	2769	6.08016e-05	6.14821	73562662	0.000143903	2.97481	3829453	8.57847e-06	-5.7822	315166701	6.08016e-05	-6.14821	73562662	0.0173602	-3.1734	4566	0.000354146	-2.6088	967360
351	L-Valine	C5H11NO2	+	118.086	-2.2	8.08	0.27	11	1931648128	2092388992	2066617344	2196990720	2182682112	414744768	270328960	300571168	30906256	31890692	37854640	0.186646	-0.094863	11904	6.12144e-05	5.90616	1001990210	0.000257608	2.61447	27820480	0.186646	0.094863	11904	8.72962e-07	6.00103	80053607493	7.1804e-06	2.70933	1128213564	6.12144e-05	-5.90616	1001990210	8.72962e-07	-6.00103	80053607493	0.00258148	-3.2917	686796	0.000257608	-2.61447	27820480
352	Malonyl-CoA	C24H38N7O19P3S	+	854.123	6.2	13.39	0.52	2	10929	-	15218	-	-	-	-	-	-	-	-	0.613908	-0.165847	0	0.272228	0.0655034	0	0.272228	0.0655034	0	0.613908	0.165847	0	0.373901	0.23135	0	0.373901	0.23135	0	0.272228	-0.0655034	0	0.373901	-0.23135	0	NA	0	0	0.272228	-0.0655034	0
353	Melatonin	C13H16N2O2	+	233.129	4.5	3.12	0.45	11	36838	52057	343347	76630	261461	54523	64409	102171	79050	32035	276092	0.171176	-2.35345	4	0.445899	-1.53786	1	0.23206	-0.729582	0	0.171176	2.35345	4	0.417811	0.815589	1	0.128289	1.62386	4	0.445899	1.53786	1	0.417811	-0.815589	1	0.507542	0.808275	0	0.23206	0.729582	0
354	Menaquinone	C41H56O2	-	579.421	-5.3	9.67	0.15	2	-	23460	-	-	-	-	-	-	-	13066	-	0.272228	0.742437	0	0.351507	0.602051	0	0.272228	0.742437	0	0.272228	-0.742437	0	0.373901	-0.140386	0	NA	0	0	0.351507	-0.602051	0	0.373901	0.140386	0	0.373901	0.140386	0	0.272228	-0.742437	0
355	Mercaptopyruvate	C3H4O3S	+	120.995	10	3.22	0.07	4	-	-	-	-	-	-	83921	-	139820	349176	168463	NA	0	0	0.0898973	-4.45387	28	0.495025	-1.79245	0	NA	0	0	0.03317	-4.45387	76	0.373901	-1.79245	0	0.0898973	4.45387	28	0.03317	4.45387	76	0.0578609	2.66141	14	0.495025	1.79245	0
356	Methylglyoxal	C3H4O2	+	73.0284	-6.9	12.45	0.86	5	101412	96304	122980	149734	193180	-	-	-	-	-	-	0.122808	-0.65161	2	2.72473e-05	2.57709	12639	2.72473e-05	2.57709	12639	0.122808	0.65161	2	0.00246714	3.2287	327	0.00246714	3.2287	327	2.72473e-05	-2.57709	12639	0.00246714	-3.2287	327	NA	0	0	2.72473e-05	-2.57709	12639
357	Methylmalonate	C4H6O4	-	117.019	-13.9	12.43	0.64	8	7906117	9337598	6288986	3552918	3724787	7712126	7464278	4062463	-	-	-	0.0474201	0.930964	264	0.000621128	4.03678	120856	0.263884	0.427009	38	0.0474201	-0.930964	264	0.0106789	3.10582	2035	0.268545	-0.503955	29	0.000621128	-4.03678	120856	0.0106789	-3.10582	2035	0.00748798	-3.60977	5656	0.263884	-0.427009	38
358	myo-Inositol	C6H12O6	-	179.056	-7.9	11.25	0.49	7	1485453	1376017	24022348	10325849	14125584	-	-	-	-	2002693	755390	0.0681744	-3.49741	1457	0.646978	0.314021	2	0.000370866	1.0426	5902	0.0681744	3.49741	1457	0.0216524	3.81143	5612	0.0193042	4.54002	10155	0.646978	-0.314021	2	0.0216524	-3.81143	5612	0.344685	0.728581	4	0.000370866	-1.0426	5902
359	myo-Inositol 4-phosphate	C6H13O9P	-	259.022	-4.8	13.99	0.09	7	13248660	6775914	8517686	5067621	5726525	-	-	674002	-	673201	-	0.287553	0.637249	44	0.0304004	3.91915	2656	0.0304026	3.91857	2655	0.287553	-0.637249	44	0.00546455	3.2819	6318	0.00546549	3.28132	6314	0.0304004	-3.91915	2656	0.00546455	-3.2819	6318	0.975659	-0.000581897	1	0.0304026	-3.91857	2655
360	N-((R)-Pantothenoyl)-L-cysteine	C12H22N2O6S	-	321.113	-5.9	3.21	0.34	11	42777	73858	117976	84044	197653	115425	65732	150347	219786	178099	181425	0.194475	-1.19186	1	0.00745236	-1.72737	56	0.219725	-0.922063	1	0.194475	1.19186	1	0.173728	-0.535515	1	0.614526	0.269794	0	0.00745236	1.72737	56	0.173728	0.535515	1	0.0417792	0.805309	6	0.219725	0.922063	1
361	N2-Acetyl-L-ornithine	C7H14N2O3	+	175.108	-4.1	10.01	0.83	8	9885617	10625686	21177692	27404584	26720978	25557	32010	36497	-	-	-	0.0102064	-1.29133	4239	4.30853e-05	8.73314	50764552	4.31912e-05	8.35352	38951546	0.0102064	1.29133	4239	0.000220107	10.0245	59444430	0.000220358	9.64485	45652621	4.30853e-05	-8.73314	50764552	0.000220107	-10.0245	59444430	0.0843451	-0.379617	0	4.31912e-05	-8.35352	38951546
362	N4-Acetylaminobutanal	C6H11NO2	+	130.086	-2.7	5.04	0.2	11	5574310	5169231	20308072	27462836	25623910	3392689	3521096	2183052	9822219	12612348	9075115	0.00627877	-2.18725	10821	0.0349726	-0.967363	444	0.0262484	0.824995	284	0.00627877	2.18725	10821	0.00434741	1.21988	9368	0.000607785	3.01224	182509	0.0349726	0.967363	444	0.00434741	-1.21988	9368	0.00296844	1.79236	7897	0.0262484	-0.824995	284
363	N6-(1,2-Dicarboxyethyl)-AMP	C14H18N5O11P	+	464.081	6.4	12.16	0.21	1	-	-	-	-	24787	-	-	-	-	-	-	0.495025	-0.520446	0	NA	0	0	NA	0	0	0.495025	0.520446	0	0.373901	0.520446	0	0.373901	0.520446	0	NA	0	0	0.373901	-0.520446	0	NA	0	0	NA	0	0
364	N-Acetyl-D-glucosamine	C8H15NO6	+	222.097	-4.6	8.49	0.87	9	38526140	43702980	29255302	34024888	49525400	208671	182787	135821	-	122526	-	0.694914	0.128845	62	0.000227504	8.94589	44651757	0.000229051	7.8699	21084500	0.694914	-0.128845	62	0.00358493	8.81705	2370594	0.00361759	7.74106	1117057	0.000227504	-8.94589	44651757	0.00358493	-8.81705	2370594	0.0331613	-1.07599	8	0.000229051	-7.8699	21084500
365	N-Acetyl-D-glucosamine 6-phosphate	C8H16NO9P	-	300.049	-4.3	11.94	0.4	8	8973153	6999394	1726590	724384	1065144	157128	-	140717	-	151348	-	0.00375377	2.7685	8312	0.0017466	6.13647	163121	0.00175787	5.93189	140948	0.00375377	-2.7685	8312	0.0229527	3.36797	289	0.0241884	3.16338	241	0.0017466	-6.13647	163121	0.0229527	-3.36797	289	0.5511	-0.204584	0	0.00175787	-5.93189	140948
366	N-Acetylgalactosamine	C8H15NO6	+	222.097	-4.6	8.49	0.87	9	38526140	43702980	29255302	34024888	49525400	208671	182787	135821	-	122526	-	0.694914	0.128845	62	0.000227504	8.94589	44651757	0.000229051	7.8699	21084500	0.694914	-0.128845	62	0.00358493	8.81705	2370594	0.00361759	7.74106	1117057	0.000227504	-8.94589	44651757	0.00358493	-8.81705	2370594	0.0331613	-1.07599	8	0.000229051	-7.8699	21084500
367	N-Acetylgalactosamine 4-sulfate	C8H15NO9S	-	300.039	-2.9	15.01	0.25	0	-	-	-	-	-	-	-	-	-	-	-	NA	0	0	NA	0	0	NA	0	0	NA	0	0	NA	0	0	NA	0	0	NA	0	0	NA	0	0	NA	0	0	NA	0	0
368	N-Acetyl-L-glutamate	C7H11NO5	-	188.056	-7.7	11.47	0.58	5	61157400	52939336	57937916	33024320	41542644	-	-	-	-	-	-	0.285056	0.369175	229	0.000352513	6.12958	5746231	0.000352513	6.12958	5746231	0.285056	-0.369175	229	0.00405281	5.7604	300827	0.00405281	5.7604	300827	0.000352513	-6.12958	5746231	0.00405281	-5.7604	300827	NA	0	0	0.000352513	-6.12958	5746231
369	N-Acetyl-L-glutamate 5-phosphate	C7H12NO8P	+	270.037	15.1	3.74	0.76	5	54782	67452	85416	41718	17624	-	-	-	-	-	-	0.655269	0.340965	0	0.0018224	2.43104	107	0.0018224	2.43104	107	0.655269	-0.340965	0	0.136274	2.09008	1	0.136274	2.09008	1	0.0018224	-2.43104	107	0.136274	-2.09008	1	NA	0	0	0.0018224	-2.43104	107
370	N-Acetyl-L-glutamate 5-semialdehyde	C7H11NO4	-	172.061	1.6	2.52	0.98	0	-	-	-	-	-	-	-	-	-	-	-	NA	0	0	NA	0	0	NA	0	0	NA	0	0	NA	0	0	NA	0	0	NA	0	0	NA	0	0	NA	0	0	NA	0	0
371	N-Acylsphingosine	C30H59NO3	+	482.457	10.8	2.73	0.32	7	47971	-	18491	21739	29871	25718	28253	-	-	13435	-	0.729675	0.310859	0	0.298691	1.37893	0	0.66392	0.442876	0	0.729675	-0.310859	0	0.0267619	1.06808	1	0.773538	0.132017	0	0.298691	-1.37893	0	0.0267619	-1.06808	1	0.155356	-0.936059	0	0.66392	-0.442876	0
372	NAD+	C21H28N7O14P2	+	665.124	-12.7	11.11	0.36	6	553465	329419	448230	333165	253539	-	-	15924	-	-	-	0.448326	0.35572	1	0.0142063	5.25071	607	0.0143483	5.08147	536	0.448326	-0.35572	1	0.00413055	4.89499	1284	0.00420154	4.72575	1127	0.0142063	-5.25071	607	0.00413055	-4.89499	1284	0.373901	-0.169245	0	0.0143483	-5.08147	536
373	NADH	C21H29N7O14P2	+	666.132	-14.9	11.3	0.06	3	78821	-	-	34733	67926	-	-	-	-	-	-	0.851226	0.241973	0	0.272228	2.1509	0	0.272228	2.1509	0	0.851226	-0.241973	0	0.175955	1.90893	1	0.175955	1.90893	1	0.272228	-2.1509	0	0.175955	-1.90893	1	NA	0	0	0.272228	-2.1509	0
374	NADP+	C21H29N7O17P3	+	745.091	12.4	27.6	0.12	1	-	-	-	-	26813	-	-	-	-	-	-	0.495025	-0.583485	0	NA	0	0	NA	0	0	0.495025	0.583485	0	0.373901	0.583485	0	0.373901	0.583485	0	NA	0	0	0.373901	-0.583485	0	NA	0	0	NA	0	0
375	N-Carbamoyl-L-aspartate	C5H8N2O5	+	177.051	-3.4	13.93	0.83	5	7201326	5475122	3739949	1820955	2649858	-	-	-	-	-	-	0.0334035	1.21153	315	0.00224404	8.29226	444128	0.00224404	8.29226	444128	0.0334035	-1.21153	315	0.00810773	7.08073	23017	0.00810773	7.08073	23017	0.00224404	-8.29226	444128	0.00810773	-7.08073	23017	NA	0	0	0.00224404	-8.29226	444128
376	Nicotinamide	C6H6N2O	+	123.055	-2.4	4.64	0.16	11	80557272	72101248	68206512	119851848	138236528	67128616	45298440	40905488	2240818	2759029	3895972	0.319459	-0.510906	413	0.000184137	4.686	5542416	0.104338	0.578607	912	0.319459	0.510906	413	0.00725246	5.19691	282540	0.062297	1.08951	2731	0.000184137	-4.686	5542416	0.00725246	-5.19691	282540	0.00406104	-4.10739	114759	0.104338	-0.578607	912
377	Nicotinamide D-ribonucleotide	C11H15N2O8P	+	335.064	-4.4	12.38	0.31	8	1028966	815802	4739110	1834662	1723110	27550	23279	18956	-	-	-	0.244622	-1.58417	23	0.00141694	6.5273	30348	0.00148294	5.30934	12643	0.244622	1.58417	23	0.0492533	8.11146	7793	0.0499345	6.89351	3320	0.00141694	-6.5273	30348	0.0492533	-8.11146	7793	0.00590333	-1.21795	7	0.00148294	-5.30934	12643
378	Nicotinamide-beta-riboside	C11H15N2O5	-	254.091	-10.3	7.43	0.34	0	-	-	-	-	-	-	-	-	-	-	-	NA	0	0	NA	0	0	NA	0	0	NA	0	0	NA	0	0	NA	0	0	NA	0	0	NA	0	0	NA	0	0	NA	0	0
379	Nicotinate	C6H5NO2	+	124.039	-2.5	5.44	0.56	8	211988	261905	550806	2627812	2274858	-	-	-	262849	204688	245591	0.152434	-2.93958	52	0.980675	-0.0046372	0	0.0247505	0.575938	12	0.152434	2.93958	52	0.0695649	2.93494	113	0.0609844	3.51552	185	0.980675	0.0046372	0	0.0695649	-2.93494	113	0.0102879	0.580576	29	0.0247505	-0.575938	12
380	Nicotinate D-ribonucleoside	C11H14NO6	+	257.089	0.8	11.26	0.13	7	73212	-	108555	266479	235035	49244	37495	26103	-	-	-	0.0934727	-2.28915	6	0.272228	2.05679	0	0.883678	0.145522	0	0.0934727	2.28915	6	0.0160446	4.34594	135	0.0272325	2.43467	24	0.272228	-2.05679	0	0.0160446	-4.34594	135	0.0144524	-1.91127	6	0.883678	-0.145522	0
381	Nicotinate D-ribonucleotide	C11H16NO9P	+	338.063	-1.9	4.56	0.35	5	36492	33208	238340	383457	45068	-	-	-	-	-	-	0.235134	-2.6732	3	0.00026117	1.80116	299	0.00026117	1.80116	299	0.235134	2.6732	3	0.0962502	4.47436	27	0.0962502	4.47436	27	0.00026117	-1.80116	299	0.0962502	-4.47436	27	NA	0	0	0.00026117	-1.80116	299
382	N-Succinyl-2-L-amino-6-oxoheptanedioate	C11H15NO8	+	290.087	-7	6.11	0.17	8	40208	40037	513328	356788	267304	47292	38915	33402	-	-	-	0.0354285	-3.24025	56	2.35983e-08	1.84053	3894722	0.964369	0.00911996	0	0.0354285	3.24025	56	0.00689714	5.08077	958	0.00922912	3.24937	216	2.35983e-08	-1.84053	3894722	0.00689714	-5.08077	958	0.00207942	-1.83141	44	0.964369	-0.00911996	0
383	N-Succinyl-LL-2,6-diaminoheptanedioate	C11H18N2O7	-	289.104	1	5.08	0.73	0	-	-	-	-	-	-	-	-	-	-	-	NA	0	0	NA	0	0	NA	0	0	NA	0	0	NA	0	0	NA	0	0	NA	0	0	NA	0	0	NA	0	0	NA	0	0
384	O-1-Alk-1-enyl-2-acyl-sn-glycero-3-phosphoethanolamine	C37H74NO7P	+	676.528	13.1	11.65	0.19	1	35947	-	-	-	-	-	-	-	-	-	-	0.272228	1.11781	0	0.272228	1.11781	0	0.272228	1.11781	0	0.272228	-1.11781	0	NA	0	0	NA	0	0	0.272228	-1.11781	0	NA	0	0	NA	0	0	0.272228	-1.11781	0
385	O-Acetylcarnitine	C9H17NO4	+	204.123	-4.1	7.78	0.73	11	294753440	326264960	477813504	619553408	654590656	15554200	10743996	12481779	2562604	281262	559759	0.0306198	-0.911297	27471	0.00012112	8.09638	352100619	0.000139623	4.58621	27822107	0.0306198	0.911297	27471	0.000419255	9.00768	359185875	0.000454361	5.49751	29675314	0.00012112	-8.09638	352100619	0.000419255	-9.00768	359185875	0.00171925	-3.51017	46593	0.000139623	-4.58621	27822107
386	Octadecanoic acid	C18H36O2	-	283.264	-5.1	2.73	0.52	2	-	-	-	-	-	7552378	-	7180808	-	-	-	NA	0	0	NA	0	0	0.219659	-1.72307	53	NA	0	0	NA	0	0	0.116537	-1.72307	101	NA	0	0	NA	0	0	0.116537	-1.72307	101	0.219659	1.72307	53
387	Octanoyl-CoA	C29H50N7O17P3S	+	894.227	-8.3	20.73	0.55	1	-	-	27129	-	-	-	-	-	-	-	-	0.495025	-0.651653	0	NA	0	0	NA	0	0	0.495025	0.651653	0	0.373901	0.651653	0	0.373901	0.651653	0	NA	0	0	0.373901	-0.651653	0	NA	0	0	NA	0	0
388	Oleic acid	C18H34O2	-	281.249	-4.3	2.8	0.23	11	1152946	477606	1678279	576299	1921237	29053158	6786258	32992788	2050412	634710	2231948	0.400834	-0.771735	5	0.323404	-1.00748	8	0.126521	-4.81469	2642	0.400834	0.771735	5	0.724289	-0.235741	2	0.0576848	-4.04295	3477	0.323404	1.00748	8	0.724289	0.235741	2	0.059646	-3.80721	2885	0.126521	4.81469	2642
389	OPC4-CoA	C35H56N7O18P3S	-	986.254	-9.2	4.61	0.11	1	-	-	32345	-	-	-	-	-	-	-	-	0.495025	-0.0918906	0	NA	0	0	NA	0	0	0.495025	0.0918906	0	0.373901	0.0918906	0	0.373901	0.0918906	0	NA	0	0	0.373901	-0.0918906	0	NA	0	0	NA	0	0
390	O-Phospho-L-serine	C3H8NO6P	+	186.016	-1.6	13.67	0.25	5	102133	116284	54332	73674	82021	-	-	-	-	-	-	0.0452487	0.641473	3	0.000793351	1.62089	281	0.000793351	1.62089	281	0.0452487	-0.641473	3	0.0136163	0.979417	8	0.0136163	0.979417	8	0.000793351	-1.62089	281	0.0136163	-0.979417	8	NA	0	0	0.000793351	-1.62089	281
391	Orotate	C5H4N2O4	-	155.01	-6	7.74	0.76	5	271375	313259	117545	140848	149350	-	-	-	-	-	-	0.00426393	1.10484	108	0.000795673	1.9743	905	0.000795673	1.9743	905	0.00426393	-1.10484	108	0.00293791	0.869469	65	0.00293791	0.869469	65	0.000795673	-1.9743	905	0.00293791	-0.869469	65	NA	0	0	0.000795673	-1.9743	905
392	Orthophosphate	O4P	-	93.9461	-3.7	2.79	0.2	4	-	-	-	43255	57430	-	-	43596	35436	-	-	0.234926	-1.88343	0	0.495025	-0.885861	0	0.495025	-1.08397	0	0.234926	1.88343	0	0.324702	0.997565	0	0.431753	0.799452	0	0.495025	0.885861	0	0.324702	-0.997565	0	0.855889	-0.198113	0	0.495025	1.08397	0
393	Oxaloacetate	C4H4O5	-	130.999	15.3	10.42	0.36	11	31462	23388	63631	20867	59267	105358	71151	65921	76701	96900	68461	0.332869	-0.805186	0	0.0181405	-1.55685	9	0.0462166	-1.55904	3	0.332869	0.805186	0	0.109931	-0.751664	1	0.147917	-0.753856	1	0.0181405	1.55685	9	0.109931	0.751664	1	0.993857	-0.00219162	0	0.0462166	1.55904	3
394	Oxalosuccinate	C6H6O7	+	191.019	-3.8	12.53	0	2	46109	20143	-	-	-	-	-	-	-	-	-	0.0967587	1.72796	1	0.0967587	1.72796	1	0.0967587	1.72796	1	0.0967587	-1.72796	1	NA	0	0	NA	0	0	0.0967587	-1.72796	1	NA	0	0	NA	0	0	0.0967587	-1.72796	1
395	P1,P3-Bis(5'-adenosyl) triphosphate	C20H27N10O16P3	+	757.089	-12.8	3.8	0.38	1	-	-	-	-	-	-	-	-	14952	-	-	NA	0	0	0.495025	-0.152209	0	NA	0	0	NA	0	0	0.373901	-0.152209	0	NA	0	0	0.495025	0.152209	0	0.373901	0.152209	0	0.373901	0.152209	0	NA	0	0
396	Palmitoyl-carnitine	C23H45NO4	+	400.342	-2.3	3.16	0.29	4	-	-	-	-	125264	113874	102242	87165	-	-	-	0.495025	-2.05554	0	NA	0	0	0.00296277	-3.07904	161	0.495025	2.05554	0	0.373901	2.05554	0	0.253573	-1.0235	1	NA	0	0	0.373901	-2.05554	0	0.000323323	-3.07904	1477	0.00296277	3.07904	161
397	Pantetheine	C11H22N2O4S	+	279.137	-15.1	3.33	0.14	11	170298	756169	690052	431773	227190	671087	129919	206758	686754	341234	607284	0.964222	0.0428676	0	0.77068	-0.234757	1	0.707742	0.463616	1	0.964222	-0.0428676	0	0.60425	-0.277624	1	0.625782	0.420749	1	0.77068	0.234757	1	0.60425	0.277624	1	0.351926	0.698373	2	0.707742	-0.463616	1
398	Pantetheine 4'-phosphate	C11H23N2O7PS	-	357.089	0	11.59	0.35	4	38332	24177	20953	-	18363	-	-	-	-	-	-	0.106741	0.82771	0	0.0436282	1.20977	1	0.0436282	1.20977	1	0.106741	-0.82771	0	0.13347	0.382059	0	0.13347	0.382059	0	0.0436282	-1.20977	1	0.13347	-0.382059	0	NA	0	0	0.0436282	-1.20977	1
399	Pantothenate	C9H17NO5	+	220.118	-4.3	6.31	0.64	8	16880638	18642926	12236127	17131310	17065354	239177	181193	159777	-	-	-	0.374193	0.198595	51	0.000113114	7.2758	12245236	0.00011501	6.52118	7169586	0.374193	-0.198595	51	0.000691287	7.0772	1522897	0.000705419	6.32258	889008	0.000113114	-7.2758	12245236	0.000691287	-7.0772	1522897	0.0293519	-0.754622	9	0.00011501	-6.52118	7169586
400	Paraoxon	C10H14NO6P	+	276.063	10.3	9.75	0.17	4	64756	53037	10568	-	11526	-	-	-	-	-	-	0.00163428	2.46084	117	0.00152748	2.55818	133	0.00152748	2.55818	133	0.00163428	-2.46084	117	0.192062	0.0973411	0	0.192062	0.0973411	0	0.00152748	-2.55818	133	0.192062	-0.0973411	0	NA	0	0	0.00152748	-2.55818	133
401	Parathion	C10H14NO5PS	+	292.04	6.1	14.96	0.32	3	31890	17126	-	-	23704	-	-	-	-	-	-	0.441181	0.373137	0	0.243037	0.567991	0	0.243037	0.567991	0	0.441181	-0.373137	0	0.373901	0.194854	0	0.373901	0.194854	0	0.243037	-0.567991	0	0.373901	-0.194854	0	NA	0	0	0.243037	-0.567991	0
402	Perillic acid	C10H14O2	+	167.107	-1.5	3.53	0.23	11	242781	434855	163223	330541	505378	143831	209110	160828	288709	347614	300551	0.971003	0.0247833	0	0.74778	0.117618	0	0.114357	0.984353	4	0.971003	-0.0247833	0	0.846322	0.0928347	0	0.183391	0.95957	3	0.74778	-0.117618	0	0.846322	-0.0928347	0	0.00605328	0.866735	73	0.114357	-0.984353	4
403	Perillyl aldehyde	C10H14O	+	151.112	-14.8	6.47	0.69	8	169624	75625	-	-	180957	42463	-	34647	61651	67798	178277	0.587041	0.679402	0	0.7609	0.257563	0	0.0885763	1.85793	3	0.587041	-0.679402	0	0.707423	-0.421839	0	0.460917	1.17853	0	0.7609	-0.257563	0	0.707423	0.421839	0	0.14672	1.60037	1	0.0885763	-1.85793	3
404	Phenylpyruvate	C9H8O3	+	165.055	-4.4	9.61	0.7	11	6940448	6644039	8894822	9934330	10334454	1575385	723132	804450	19211	192771	17380	0.0139219	-0.517247	849	1.73247e-05	6.47315	17611268	0.000565354	2.7152	45455	0.0139219	0.517247	849	2.40407e-05	6.9904	25909803	6.84627e-05	3.23245	738263	1.73247e-05	-6.47315	17611268	2.40407e-05	-6.9904	25909803	0.0260733	-3.75795	288	0.000565354	-2.7152	45455
405	Phosphatidate	C35H69O8P	+	649.48	-2.4	15.82	0	2	20284	-	-	-	-	-	-	-	15159	-	-	0.272228	0.598556	0	0.496006	0.369624	0	0.272228	0.598556	0	0.272228	-0.598556	0	0.373901	-0.228932	0	NA	0	0	0.496006	-0.369624	0	0.373901	0.228932	0	0.373901	0.228932	0	0.272228	-0.598556	0
406	Phosphatidylcholine	C40H80NO8P	+	734.569	-4	2.94	0.35	3	-	-	-	-	-	250025	208818	101986	-	-	-	NA	0	0	NA	0	0	0.0530039	-4.22453	35	NA	0	0	NA	0	0	0.0159811	-4.22453	115	NA	0	0	NA	0	0	0.0159811	-4.22453	115	0.0530039	4.22453	35
407	Phosphatidylethanolamine	C43H78NO7P	+	752.559	-6.3	2.81	0.31	3	-	-	-	-	-	94099	56205	63975	-	-	-	NA	0	0	NA	0	0	0.0259598	-2.83646	11	NA	0	0	NA	0	0	0.00602386	-2.83646	48	NA	0	0	NA	0	0	0.00602386	-2.83646	48	0.0259598	2.83646	11
408	Phosphatidylserine	C38H74NO10P	+	736.512	-0.7	8.4	0.11	0	-	-	-	-	-	-	-	-	-	-	-	NA	0	0	NA	0	0	NA	0	0	NA	0	0	NA	0	0	NA	0	0	NA	0	0	NA	0	0	NA	0	0	NA	0	0
409	Phosphocreatine	C4H10N3O5P	-	210.029	15.1	14.63	0.41	5	28173	34166	181276	128748	77308	-	-	-	-	-	-	0.0859123	-2.0504	4	0.0524604	0.365098	1	0.0524604	0.365098	1	0.0859123	2.0504	4	0.0249995	2.4155	16	0.0249995	2.4155	16	0.0524604	-0.365098	1	0.0249995	-2.4155	16	NA	0	0	0.0524604	-0.365098	1
410	Phosphoenolpyruvate	C3H5O6P	-	166.975	-15	3.38	0.49	11	178093	202184	473368	644243	987130	139868	228282	134219	253827	268346	394033	0.0790123	-1.88356	21	0.141821	-0.683659	3	0.613131	0.183266	0	0.0790123	1.88356	21	0.065652	1.1999	18	0.0256726	2.06682	71	0.141821	0.683659	3	0.065652	-1.1999	18	0.062797	0.866925	7	0.613131	-0.183266	0
411	Phytosphingosine	C18H39NO3	+	318.3	0.4	15.35	0.37	1	12077	-	-	-	-	-	-	-	-	-	-	0.272228	0.0724301	0	0.272228	0.0724301	0	0.272228	0.0724301	0	0.272228	-0.0724301	0	NA	0	0	NA	0	0	0.272228	-0.0724301	0	NA	0	0	NA	0	0	0.272228	-0.0724301	0
412	Porphobilinogen	C10H14N2O4	-	225.088	1.4	1.25	0.85	0	-	-	-	-	-	-	-	-	-	-	-	NA	0	0	NA	0	0	NA	0	0	NA	0	0	NA	0	0	NA	0	0	NA	0	0	NA	0	0	NA	0	0	NA	0	0
413	Propanoate	C3H6O2	-	73.0295	6.8	7.39	0.86	0	-	-	-	-	-	-	-	-	-	-	-	NA	0	0	NA	0	0	NA	0	0	NA	0	0	NA	0	0	NA	0	0	NA	0	0	NA	0	0	NA	0	0	NA	0	0
414	Propanoyl-CoA	C24H40N7O17P3S	+	824.149	-4.5	12.31	0.51	1	-	-	22549	-	-	-	-	-	-	-	-	0.495025	-0.444141	0	NA	0	0	NA	0	0	0.495025	0.444141	0	0.373901	0.444141	0	0.373901	0.444141	0	NA	0	0	0.373901	-0.444141	0	NA	0	0	NA	0	0
415	Propenoyl-CoA	C24H38N7O17P3S	+	822.133	-7.6	3.79	0.21	1	-	-	29763	-	-	-	-	-	-	-	-	0.495025	-0.730111	0	NA	0	0	NA	0	0	0.495025	0.730111	0	0.373901	0.730111	0	0.373901	0.730111	0	NA	0	0	0.373901	-0.730111	0	NA	0	0	NA	0	0
416	Propionyladenylate	C13H18N5O8P	+	404.097	-5.6	12.4	0.56	0	-	-	-	-	-	-	-	-	-	-	-	NA	0	0	NA	0	0	NA	0	0	NA	0	0	NA	0	0	NA	0	0	NA	0	0	NA	0	0	NA	0	0	NA	0	0
417	Protein N6,N6-dimethyl-L-lysine	C8H18N2O2	+	175.144	-2.9	16.16	0.46	8	119188	106438	81770	75478	94165	1052336	495439	966850	-	-	-	0.0424677	0.428837	3	0.000536706	1.60588	425	0.0476942	-2.89338	74	0.0424677	-0.428837	3	0.00104369	1.17705	131	0.0121124	-3.32221	381	0.000536706	-1.60588	425	0.00104369	-1.17705	131	0.00983059	-4.49926	1007	0.0476942	2.89338	74
418	Protoporphyrin	C34H34N4O4	+	563.265	-2.8	11.38	0.12	1	-	-	-	34099	-	-	-	-	-	-	-	0.495025	-0.795505	0	NA	0	0	NA	0	0	0.495025	0.795505	0	0.373901	0.795505	0	0.373901	0.795505	0	NA	0	0	0.373901	-0.795505	0	NA	0	0	NA	0	0
419	Protoporphyrinogen IX	C34H40N4O4	-	567.298	3.4	7.3	0.33	2	25568	-	86452	-	-	-	-	-	-	-	-	0.632941	-0.996589	0	0.272228	0.83058	0	0.272228	0.83058	0	0.632941	0.996589	0	0.373901	1.82717	0	0.373901	1.82717	0	0.272228	-0.83058	0	0.373901	-1.82717	0	NA	0	0	0.272228	-0.83058	0
420	Putrescine	C4H12N2	+	89.1073	2	9.2	0.82	0	-	-	-	-	-	-	-	-	-	-	-	NA	0	0	NA	0	0	NA	0	0	NA	0	0	NA	0	0	NA	0	0	NA	0	0	NA	0	0	NA	0	0	NA	0	0
421	Pyridoxal	C8H9NO3	+	168.065	-3.7	5.48	0.47	8	17697952	25519116	4060459	24608532	20593428	440200	196668	323818	-	-	-	0.589941	0.396076	42	0.00509599	9.64643	1701270	0.00530771	6.07635	139393	0.589941	-0.396076	42	0.0595954	9.25035	84042	0.0626118	5.68028	6855	0.00509599	-9.64643	1701270	0.0595954	-9.25035	84042	0.0140291	-3.57008	147	0.00530771	-6.07635	139393
422	Pyridoxal phosphate	C8H10NO6P	+	248.032	3.8	11.13	0.67	3	-	-	-	112190	64225	-	17028	-	-	-	-	0.266685	-2.41326	1	NA	0	0	0.495025	-0.199931	0	0.266685	2.41326	1	0.15371	2.41326	1	0.165555	2.21333	1	NA	0	0	0.15371	-2.41326	1	0.373901	-0.199931	0	0.495025	0.199931	0
423	Pyridoxamine	C8H12N2O2	+	169.097	-2.7	4	0.93	8	81501	85724	191856	285041	209506	-	-	-	121234	94853	94847	0.0292965	-1.4523	15	0.178851	-0.309855	1	0.0321364	0.106891	3	0.0292965	1.4523	15	0.0138538	1.14245	26	0.00613102	1.55919	74	0.178851	0.309855	1	0.0138538	-1.14245	26	0.0416909	0.416746	3	0.0321364	-0.106891	3
424	Pyridoxamine phosphate	C8H13N2O5P	+	249.064	-11.2	8.24	0.27	8	48261	54291	95607	143256	117138	37318	55888	19905	-	-	-	0.0329062	-1.21056	6	0.00038123	2.20961	378	0.391824	0.443579	0	0.0329062	1.21056	6	0.00145106	3.42017	479	0.00936195	1.65414	26	0.00038123	-2.20961	378	0.00145106	-3.42017	479	0.0624988	-1.76603	1	0.391824	-0.443579	0
425	Pyridoxine	C8H11NO3	+	170.081	-3.9	5.38	0.64	9	10213264	15942870	128445	12793708	2514977	1460341	1093626	800648	-	1509512	-	0.241668	1.34571	96	0.0110591	4.64732	15409	0.0114539	3.54789	7248	0.241668	-1.34571	96	0.303201	3.30162	92	0.359019	2.20219	40	0.0110591	-4.64732	15409	0.303201	-3.30162	92	0.322994	-1.09943	5	0.0114539	-3.54789	7248
426	Pyridoxine phosphate	C8H12NO6P	+	250.048	8.8	27.62	0.35	11	3946563	4046979	4132602	4369602	4489569	1715301	1837817	1808888	1603924	1717217	1648100	0.0979352	-0.115729	46	3.12508e-05	1.27077	218244	4.54991e-05	1.16102	142137	0.0979352	0.115729	46	1.69468e-05	1.3865	461817	2.16546e-05	1.27675	342267	3.12508e-05	-1.27077	218244	1.69468e-05	-1.3865	461817	0.057404	-0.109747	32	4.54991e-05	-1.16102	142137
427	Pyruvate	C3H4O3	-	87.0088	-14.6	11.09	0.69	2	339583	-	651299	-	-	-	-	-	-	-	-	0.60124	-0.382218	1	0.272228	0.146125	1	0.272228	0.146125	1	0.60124	0.382218	1	0.373901	0.528343	1	0.373901	0.528343	1	0.272228	-0.146125	1	0.373901	-0.528343	1	NA	0	0	0.272228	-0.146125	1
428	Quinolinate	C7H5NO4	-	166.015	11	5.58	0.19	11	15765611	21764880	52912916	98499248	74828096	21406760	15937549	19718740	43791952	42085244	38053840	0.0455593	-2.00676	4154	0.00553604	-1.13844	11945	0.938627	-0.0195312	20	0.0455593	2.00676	4154	0.0620129	0.868318	1718	0.0131347	1.98723	14253	0.00553604	1.13844	11945	0.0620129	-0.868318	1718	0.000686067	1.11891	95493	0.938627	0.0195312	20
429	Retinal	C20H28O	+	285.221	15.1	3.57	0.51	9	28452	133917	-	37332	76516	25040	47436	16659	25510	-	28399	0.457789	0.953187	0	0.233839	1.8869	1	0.298737	1.45017	1	0.457789	-0.953187	0	0.362461	0.933709	0	0.590298	0.496988	0	0.233839	-1.8869	1	0.362461	-0.933709	0	0.50064	-0.436721	0	0.298737	-1.45017	1
430	Retinoate	C20H28O2	-	299.202	-4.9	2.9	0.19	11	22181492	21892444	9320787	15047687	16241718	62580568	43677096	37731228	71582968	50534376	57809228	0.0541268	0.703046	535	0.0175949	-1.44445	6343	0.0747959	-1.123	1020	0.0541268	-0.703046	535	0.0020672	-2.14749	78779	0.011479	-1.82604	9503	0.0175949	1.44445	6343	0.0020672	2.14749	78779	0.284698	0.321451	237	0.0747959	1.123	1020
431	Retinol	C20H30O	+	287.237	-15.1	3.74	0.45	9	27320	112869	389620	381104	282472	-	-	21991	86981	87675	182364	0.0142604	-2.32437	74	0.415153	-0.763669	0	0.190882	2.12814	1	0.0142604	2.32437	74	0.00768717	1.5607	90	0.000630442	4.4525	6374	0.415153	0.763669	0	0.00768717	-1.5607	90	0.0317885	2.89181	16	0.190882	-2.12814	1
432	Riboflavin	C17H20N4O6	+	377.146	-8.6	5.61	0.69	8	201495	225444	18227	143723	153897	30306	24972	20491	-	-	-	0.154056	1.01977	2	0.000194854	3.97687	9173	0.000294218	3.07931	3429	0.154056	-1.01977	2	0.103362	2.9571	4	0.14115	2.05955	2	0.000194854	-3.97687	9173	0.103362	-2.9571	4	0.0145673	-0.897554	2	0.000294218	-3.07931	3429
433	R-Methylmalonyl-CoA	C25H40N7O19P3S	-	866.124	4	0.52	0.28	0	-	-	-	-	-	-	-	-	-	-	-	NA	0	0	NA	0	0	NA	0	0	NA	0	0	NA	0	0	NA	0	0	NA	0	0	NA	0	0	NA	0	0	NA	0	0
434	S-(Hydroxymethyl)glutathione	C11H19N3O7S	+	338.102	8.4	2.85	0.49	9	35561	75101	230676	301738	120135	-	29297	-	105067	116956	115374	0.102699	-1.97496	5	0.0346186	-1.02332	5	0.105014	1.75155	1	0.102699	1.97496	5	0.11835	0.951639	3	0.0194702	3.72651	80	0.0346186	1.02332	5	0.11835	-0.951639	3	0.00020714	2.77488	2129	0.105014	-1.75155	1
435	S-Adenosyl-L-homocysteine	C14H20N6O5S	+	385.129	-5.1	10.01	0.11	8	1444178	1222867	985554	933918	1130790	250062	167896	174402	-	-	-	0.0665748	0.391272	23	0.000528571	6.80808	142613	0.0010452	2.75566	4946	0.0665748	-0.391272	23	6.93931e-05	6.4168	633248	0.00022213	2.36439	14074	0.000528571	-6.80808	142613	6.93931e-05	-6.4168	633248	0.00215019	-4.05242	808	0.0010452	-2.75566	4946
436	S-Adenosyl-L-methionine	C15H23N6O5S	+	400.152	-14.3	12.59	0.45	3	70069	-	47563	44152	-	-	-	-	-	-	-	0.817118	0.248765	0	0.272228	1.73198	0	0.272228	1.73198	0	0.817118	-0.248765	0	0.11715	1.48322	1	0.11715	1.48322	1	0.272228	-1.73198	0	0.11715	-1.48322	1	NA	0	0	0.272228	-1.73198	0
437	S-Adenosylmethioninamine	C14H23N6O3S	-	354.148	1	7.3	0.89	2	48419	-	75589	-	-	-	-	-	-	-	-	0.779017	-0.208378	0	0.272228	0.351848	0	0.272228	0.351848	0	0.779017	0.208378	0	0.373901	0.560226	0	0.373901	0.560226	0	0.272228	-0.351848	0	0.373901	-0.560226	0	NA	0	0	0.272228	-0.351848	0
438	S-Benzoate coenzyme A	C28H40N7O17P3S	+	872.149	7	7.73	0.44	1	-	-	-	40765	-	-	-	-	-	-	-	0.495025	-0.937101	0	NA	0	0	NA	0	0	0.495025	0.937101	0	0.373901	0.937101	0	0.373901	0.937101	0	NA	0	0	0.373901	-0.937101	0	NA	0	0	NA	0	0
439	Sedoheptulose 7-phosphate	C7H15O10P	-	289.033	-5.9	13.41	0.21	6	1148262	694545	313182	202697	207490	-	-	78814	-	-	-	0.0303461	1.93406	73	0.0152439	3.6587	412	0.0153452	3.62061	399	0.0303461	-1.93406	73	0.00956098	1.72464	54	0.0100074	1.68655	51	0.0152439	-3.6587	412	0.00956098	-1.72464	54	0.373901	-0.0380956	0	0.0153452	-3.62061	399
440	Serotonin	C10H12N2O	+	177.102	-14.9	12.3	0.56	5	538239	482081	749582	906343	797358	-	-	-	-	-	-	0.0167408	-0.680729	64	0.000165157	5.11716	55149	0.000165157	5.11716	55149	0.0167408	0.680729	64	6.53434e-05	5.79789	354381	6.53434e-05	5.79789	354381	0.000165157	-5.11716	55149	6.53434e-05	-5.79789	354381	NA	0	0	0.000165157	-5.11716	55149
441	S-Formylglutathione	C11H17N3O7S	+	336.086	-3.3	11.06	0.38	11	394158	370831	418821	458366	487401	637801	489021	536989	37717	24192	19983	0.0756058	-0.249992	7	6.71188e-05	3.80861	42775	0.0574165	-0.536018	12	0.0756058	0.249992	7	3.17262e-05	4.0586	126620	0.106986	-0.286026	6	6.71188e-05	-3.80861	42775	3.17262e-05	-4.0586	126620	0.000282023	-4.34463	20960	0.0574165	0.536018	12
442	sn-Glycero-3-phosphocholine	C8H20NO6P	+	258.11	-4.3	11.01	0.27	11	1994291200	2041750912	2573045504	2619222528	2579651072	310635872	216662368	257009792	11124053	11038114	8136356	0.00019741	-0.360367	14985030	1.51853e-06	7.64251	133434038679	2.47251e-05	2.94841	355814259	0.00019741	0.360367	14985030	5.90018e-09	8.00288	56533860560587	1.83261e-07	3.30878	77108557970	1.51853e-06	-7.64251	133434038679	5.90018e-09	-8.00288	56533860560587	0.000766344	-4.6941	4586044	2.47251e-05	-2.94841	355814259
443	sn-Glycero-3-phosphoethanolamine	C5H14NO6P	+	216.063	-3.9	12.14	0.52	11	78974248	76125016	213400640	207459056	240834176	7227080	5630172	7472834	431642	289054	239332	0.00172469	-1.50801	245808	5.77029e-06	7.92086	1635151214	1.35741e-05	3.51647	35545528	0.00172469	1.50801	245808	2.80583e-05	9.42887	2712982695	3.17729e-05	5.02448	116441782	5.77029e-06	-7.92086	1635151214	2.80583e-05	-9.42887	2712982695	0.000371776	-4.4044	202116	1.35741e-05	-3.51647	35545528
444	sn-Glycerol 3-phosphate	C3H9O6P	-	171.006	-9.3	11	0.1	11	29113742	31326324	43724136	51351440	52379536	1647202	1161661	958590	56340	52095	42271	0.013598	-0.701736	4747	4.4907e-05	9.23259	202748660	5.86997e-05	4.58881	6451783	0.013598	0.701736	4747	5.61702e-05	9.93432	428524426	6.26666e-05	5.29054	15741313	4.4907e-05	-9.23259	202748660	5.61702e-05	-9.93432	428524426	0.00412816	-4.64378	3954	5.86997e-05	-4.58881	6451783
445	Spermidine	C7H19N3	+	146.165	-12.8	12.04	0.83	3	-	-	74652	92134	114767	-	-	-	-	-	-	0.0252502	-1.57612	7	NA	0	0	NA	0	0	0.0252502	1.57612	7	0.00580108	1.57612	32	0.00580108	1.57612	32	NA	0	0	0.00580108	-1.57612	32	NA	0	0	NA	0	0
446	Spermine	C10H26N4	+	203.223	1.9	9.44	0.85	1	-	-	29488	-	-	-	-	-	-	-	-	0.495025	-0.271239	0	NA	0	0	NA	0	0	0.495025	0.271239	0	0.373901	0.271239	0	0.373901	0.271239	0	NA	0	0	0.373901	-0.271239	0	NA	0	0	NA	0	0
447	Sphinganine 1-phosphate	C18H40NO5P	+	382.272	-14.1	2.73	0.42	2	-	-	-	-	-	59013	-	68541	-	-	-	NA	0	0	NA	0	0	0.223355	-2.07821	1	NA	0	0	NA	0	0	0.119339	-2.07821	1	NA	0	0	NA	0	0	0.119339	-2.07821	1	0.223355	2.07821	1
448	Sphingomyelin	C41H84N2O6P	+	732.614	-14.4	15.6	0.3	1	-	50019	-	-	-	-	-	-	-	-	-	0.272228	1.49459	0	0.272228	1.49459	0	0.272228	1.49459	0	0.272228	-1.49459	0	NA	0	0	NA	0	0	0.272228	-1.49459	0	NA	0	0	NA	0	0	0.272228	-1.49459	0
449	Sphingosine	C18H37NO2	+	300.29	-4.7	2.92	0.1	9	21626274	-	33528740	28386660	31079134	41595200	23709160	42270892	32345324	-	31628806	0.0151371	-0.544482	2517	0.238795	-0.412334	138	0.159799	-0.75461	301	0.0151371	0.544482	2517	0.534227	0.132148	61	0.480639	-0.210128	80	0.238795	0.412334	138	0.534227	-0.132148	61	0.347392	-0.342277	117	0.159799	0.75461	301
450	Sphingosine 1-phosphate	C18H38NO5P	+	380.256	14.4	2.96	0.42	7	30889	-	149324	73836	40596	-	-	-	51994	71037	12683	0.213898	-2.01545	1	0.385886	-1.05682	0	0.272228	0.787064	0	0.213898	2.01545	1	0.306826	0.958634	0	0.0792558	2.80252	4	0.385886	1.05682	0	0.306826	-0.958634	0	0.130303	1.84388	1	0.272228	-0.787064	0
451	Sphingosyl-phosphocholine	C23H50N2O5P	+	466.353	15	3.11	0.47	3	32054	-	-	-	-	31905	-	152522	-	-	-	0.272228	1.07224	0	0.272228	1.07224	0	0.503773	-1.62395	0	0.272228	-1.07224	0	NA	0	0	0.283765	-2.69619	1	0.272228	-1.07224	0	NA	0	0	0.283765	-2.69619	1	0.503773	1.62395	0
452	Succinate	C4H6O4	-	117.019	-13.9	12.43	0.64	8	7906117	9337598	6288986	3552918	3724787	7712126	7464278	4062463	-	-	-	0.0474201	0.930964	264	0.000621128	4.03678	120856	0.263884	0.427009	38	0.0474201	-0.930964	264	0.0106789	3.10582	2035	0.268545	-0.503955	29	0.000621128	-4.03678	120856	0.0106789	-3.10582	2035	0.00748798	-3.60977	5656	0.263884	-0.427009	38
453	Succinyl-CoA	C25H40N7O19P3S	-	866.124	4	0.52	0.28	0	-	-	-	-	-	-	-	-	-	-	-	NA	0	0	NA	0	0	NA	0	0	NA	0	0	NA	0	0	NA	0	0	NA	0	0	NA	0	0	NA	0	0	NA	0	0
454	Sulfate	O4S	+	96.959	-14.5	23.71	0.73	3	-	493045	497159	-	-	-	-	-	-	525948	-	0.793221	0.545042	0	0.823473	0.466886	0	0.272228	4.65262	12	0.793221	-0.545042	0	0.969582	-0.0781556	0	0.373901	4.10757	4	0.823473	-0.466886	0	0.969582	0.0781556	0	0.373901	4.18573	5	0.272228	-4.65262	12
455	Sulfite	O3S	-	78.9495	-3	2.81	0.97	2	-	-	58209	-	-	-	-	-	-	-	109126	0.495025	-0.0373511	0	0.495025	-0.423036	0	NA	0	0	0.495025	0.0373511	0	0.409492	-0.385685	0	0.373901	0.0373511	0	0.495025	0.423036	0	0.409492	0.385685	0	0.373901	0.423036	0	NA	0	0
456	Tetradecanoic acid	C14H28O2	-	227.202	-6.8	2.89	0.13	4	-	-	262460	-	-	4098202	685036	3654228	-	-	-	0.495025	-0.0362708	1	NA	0	0	0.1603	-3.52786	110	0.495025	0.0362708	1	0.373901	0.0362708	1	0.0750377	-3.49159	230	NA	0	0	0.373901	-0.0362708	1	0.074564	-3.52786	236	0.1603	3.52786	110
457	Tetradecanoyl-CoA	C35H62N7O17P3S	+	978.321	-8.4	11.1	0.76	1	-	-	75117	-	-	-	-	-	-	-	-	0.495025	-1.48641	0	NA	0	0	NA	0	0	0.495025	1.48641	0	0.373901	1.48641	0	0.373901	1.48641	0	NA	0	0	0.373901	-1.48641	0	NA	0	0	NA	0	0
458	Tetrahydrofolate	C19H23N7O6	+	446.178	12.2	10.8	0.14	3	-	21001	-	109030	22397	-	-	-	-	-	-	0.490869	-1.60471	0	0.272228	0.632315	0	0.272228	0.632315	0	0.490869	1.60471	0	0.299017	2.23702	0	0.299017	2.23702	0	0.272228	-0.632315	0	0.299017	-2.23702	0	NA	0	0	0.272228	-0.632315	0
459	Tetrahydropteroyltri-L-glutamate	C29H37N9O12	+	704.263	6	12.5	0.87	5	662731	611470	891790	1169292	1188152	-	-	-	-	-	-	0.0377192	-0.765544	39	6.25651e-05	5.80113	288988	6.25651e-05	5.80113	288988	0.0377192	0.765544	39	0.000363569	6.56667	142681	0.000363569	6.56667	142681	6.25651e-05	-5.80113	288988	0.000363569	-6.56667	142681	NA	0	0	6.25651e-05	-5.80113	288988
460	Thiamin diphosphate	C12H19N4O7P2S	+	426.052	-12.1	9.88	0.27	5	-	13218	39776	-	-	71667	51335	94121	-	-	-	0.564176	-0.77936	0	0.272228	0.215244	0	0.032036	-2.64023	8	0.564176	0.77936	0	0.373901	0.994604	0	0.029674	-1.86087	6	0.272228	-0.215244	0	0.373901	-0.994604	0	0.00724139	-2.85548	41	0.032036	2.64023	8
461	Thiamin monophosphate	C12H17N4O4PS	+	345.078	-10.7	11.59	0.95	3	-	16949	-	-	-	-	-	13311	-	18624	-	0.272228	0.430232	0	0.902942	0.0656967	0	0.481157	0.279196	0	0.272228	-0.430232	0	0.373901	-0.364535	0	0.373901	-0.151036	0	0.902942	-0.0656967	0	0.373901	0.364535	0	0.596	0.213499	0	0.481157	-0.279196	0
462	Thiamin triphosphate	C12H20N4O10P3S	+	506.019	11.1	12.65	0.75	0	-	-	-	-	-	-	-	-	-	-	-	NA	0	0	NA	0	0	NA	0	0	NA	0	0	NA	0	0	NA	0	0	NA	0	0	NA	0	0	NA	0	0	NA	0	0
463	Thiamine	C12H17N4OS	-	264.105	9	9.46	0.89	5	353905	607499	480393	604486	699793	-	-	-	-	-	-	0.428739	-0.307482	2	0.0255671	2.4281	60	0.0255671	2.4281	60	0.428739	0.307482	2	0.0013496	2.73558	1688	0.0013496	2.73558	1688	0.0255671	-2.4281	60	0.0013496	-2.73558	1688	NA	0	0	0.0255671	-2.4281	60
464	Thiocysteine	C3H7NO2S2	-	151.984	-9.5	6.03	0.28	11	399027	332791	1034148	2141844	528731	510067	366836	337629	914774	729542	1103366	0.252825	-1.75485	11	0.0301787	-1.3237	53	0.631143	-0.145881	1	0.252825	1.75485	11	0.549306	0.431151	3	0.158366	1.60897	16	0.0301787	1.3237	53	0.549306	-0.431151	3	0.0131972	1.17781	113	0.631143	0.145881	1
465	Thiosulfate	O3S2	+	112.936	-3.2	7.3	0.09	1	-	-	-	-	15539	-	-	-	-	-	-	0.495025	-0.207107	0	NA	0	0	NA	0	0	0.495025	0.207107	0	0.373901	0.207107	0	0.373901	0.207107	0	NA	0	0	0.373901	-0.207107	0	NA	0	0	NA	0	0
466	Thymidine	C10H14N2O5	-	241.083	0	2.71	0.91	0	-	-	-	-	-	-	-	-	-	-	-	NA	0	0	NA	0	0	NA	0	0	NA	0	0	NA	0	0	NA	0	0	NA	0	0	NA	0	0	NA	0	0	NA	0	0
467	trans,trans-Farnesyl diphosphate	C15H28O7P2	+	383.138	9.6	9.34	0.35	5	16734	52063	16328	44925	42940	-	-	-	-	-	-	0.98623	-0.0138783	0	0.160929	1.78235	0	0.160929	1.78235	0	0.98623	0.0138783	0	0.0550843	1.79622	1	0.0550843	1.79622	1	0.160929	-1.78235	0	0.0550843	-1.79622	1	NA	0	0	0.160929	-1.78235	0
468	trans-2-Methyl-5-isopropylhexa-2,5-dienoyl-CoA	C31H50N7O17P3S	+	918.227	-14.5	25.98	0.69	1	-	-	-	-	-	-	54253	-	-	-	-	NA	0	0	NA	0	0	0.495025	-1.23581	0	NA	0	0	NA	0	0	0.373901	-1.23581	0	NA	0	0	NA	0	0	0.373901	-1.23581	0	0.495025	1.23581	0
469	trans-Dec-2-enoyl-CoA	C31H52N7O17P3S	+	920.243	-5.7	11.27	0.66	2	-	-	-	-	58569	-	20565	-	-	-	-	0.495025	-1.15068	0	NA	0	0	0.495025	-0.27756	0	0.495025	1.15068	0	0.373901	1.15068	0	0.461363	0.873117	0	NA	0	0	0.373901	-1.15068	0	0.373901	-0.27756	0	0.495025	0.27756	0
470	trans-Hex-2-enoyl-CoA	C27H44N7O17P3S	+	864.18	-10.5	20.65	0.73	1	-	-	-	-	19526	-	-	-	-	-	-	0.495025	-0.350959	0	NA	0	0	NA	0	0	0.495025	0.350959	0	0.373901	0.350959	0	0.373901	0.350959	0	NA	0	0	0.373901	-0.350959	0	NA	0	0	NA	0	0
471	trans-Oct-2-enoyl-CoA	C29H48N7O17P3S	+	892.211	0.9	9.79	0.46	1	-	-	-	-	22957	-	-	-	-	-	-	0.495025	-0.446783	0	NA	0	0	NA	0	0	0.495025	0.446783	0	0.373901	0.446783	0	0.373901	0.446783	0	NA	0	0	0.373901	-0.446783	0	NA	0	0	NA	0	0
472	trans-Tetradec-2-enoyl-CoA	C35H60N7O17P3S	+	976.305	-4.8	11.4	0.23	1	-	-	-	-	52038	-	-	-	-	-	-	0.495025	-1.07495	0	NA	0	0	NA	0	0	0.495025	1.07495	0	0.373901	1.07495	0	0.373901	1.07495	0	NA	0	0	0.373901	-1.07495	0	NA	0	0	NA	0	0
473	Trehalose 6-phosphate	C12H23O14P	-	421.075	-6.8	14.19	0.29	6	79596	57474	98314	63930	129892	-	-	29834	-	-	-	0.34718	-0.506765	0	0.00713327	2.26446	28	0.0190881	1.81677	8	0.34718	0.506765	0	0.0120283	2.77123	32	0.0168576	2.32354	17	0.00713327	-2.26446	28	0.0120283	-2.77123	32	0.373901	-0.447688	0	0.0190881	-1.81677	8
474	Triacylglycerol	C53H102O6	+	835.775	12.4	8.19	0.46	1	-	71660	-	-	-	-	-	-	-	-	-	0.272228	1.91094	0	0.272228	1.91094	0	0.272228	1.91094	0	0.272228	-1.91094	0	NA	0	0	NA	0	0	0.272228	-1.91094	0	NA	0	0	NA	0	0	0.272228	-1.91094	0
475	Ubiquinone	C14H18O4	+	251.128	-5.5	3.1	0.19	10	553425	486985	451446	639731	552508	314942	561763	-	412991	641802	231137	0.734731	-0.0748192	1	0.597076	0.279303	1	0.336642	0.589757	2	0.734731	0.0748192	1	0.413073	0.354122	2	0.191885	0.664576	4	0.597076	-0.279303	1	0.413073	-0.354122	2	0.644698	0.310455	1	0.336642	-0.589757	2
476	UDP	C9H14N2O12P2	+	405.01	-5.1	13.58	0.21	5	719657	326738	257644	142809	195743	-	-	-	-	-	-	0.123401	1.39653	8	0.0397699	5.42661	289	0.0397699	5.42661	289	0.123401	-1.39653	8	0.0049209	4.03008	350	0.0049209	4.03008	350	0.0397699	-5.42661	289	0.0049209	-4.03008	350	NA	0	0	0.0397699	-5.42661	289
477	UDP-alpha-D-galactose	C15H24N2O17P2	-	565.048	-3.1	13.61	0.08	5	6939060	3564108	4000222	1231166	2146040	-	-	-	-	-	-	0.187066	1.0946	44	0.0251458	9.03661	54943	0.0251458	9.03661	54943	0.187066	-1.0946	44	0.0396764	7.94201	7652	0.0396764	7.94201	7652	0.0251458	-9.03661	54943	0.0396764	-7.94201	7652	NA	0	0	0.0251458	-9.03661	54943
478	UDP-D-xylose	C14H22N2O16P2	-	535.037	-12.5	0.66	0.19	1	-	29836	-	-	-	-	-	-	-	-	-	0.272228	0.0934118	0	0.272228	0.0934118	0	0.272228	0.0934118	0	0.272228	-0.0934118	0	NA	0	0	NA	0	0	0.272228	-0.0934118	0	NA	0	0	NA	0	0	0.272228	-0.0934118	0
479	UDP-glucose	C15H24N2O17P2	-	565.048	-3.1	13.61	0.08	5	6939060	3564108	4000222	1231166	2146040	-	-	-	-	-	-	0.187066	1.0946	44	0.0251458	9.03661	54943	0.0251458	9.03661	54943	0.187066	-1.0946	44	0.0396764	7.94201	7652	0.0396764	7.94201	7652	0.0251458	-9.03661	54943	0.0396764	-7.94201	7652	NA	0	0	0.0251458	-9.03661	54943
480	UDP-glucuronate	C15H22N2O18P2	-	579.027	-1.9	16.41	0.51	5	82448	36489	44122	34406	48645	-	-	-	-	-	-	0.411959	0.488368	0	0.0687683	2.33499	3	0.0687683	2.33499	3	0.411959	-0.488368	0	0.00188617	1.84662	52	0.00188617	1.84662	52	0.0687683	-2.33499	3	0.00188617	-1.84662	52	NA	0	0	0.0687683	-2.33499	3
481	UDP-N-acetyl-alpha-D-glucosamine	C17H27N3O17P2	-	606.074	-3	12.33	0.21	5	6351824	2714411	1300312	659980	744362	-	-	-	-	-	-	0.0782405	2.33002	175	0.0446266	8.21541	15147	0.0446266	8.21541	15147	0.0782405	-2.33002	175	0.0115784	5.88539	2340	0.0115784	5.88539	2340	0.0446266	-8.21541	15147	0.0115784	-5.88539	2340	NA	0	0	0.0446266	-8.21541	15147
482	UDP-N-acetyl-D-galactosamine	C17H27N3O17P2	-	606.074	-3	12.33	0.21	5	6351824	2714411	1300312	659980	744362	-	-	-	-	-	-	0.0782405	2.33002	175	0.0446266	8.21541	15147	0.0446266	8.21541	15147	0.0782405	-2.33002	175	0.0115784	5.88539	2340	0.0115784	5.88539	2340	0.0446266	-8.21541	15147	0.0115784	-5.88539	2340	NA	0	0	0.0446266	-8.21541	15147
483	UDP-N-acetylmuramate	C20H31N3O19P2	+	680.11	4.7	10.83	0.19	1	-	-	-	25565	-	-	-	-	-	-	-	0.495025	-0.602964	0	NA	0	0	NA	0	0	0.495025	0.602964	0	0.373901	0.602964	0	0.373901	0.602964	0	NA	0	0	0.373901	-0.602964	0	NA	0	0	NA	0	0
484	UMP	C9H13N2O9P	-	323.029	-4.6	11.33	0.29	6	97729	-	31922	-	-	1776925	1576325	5881624	-	-	74546	0.274407	1.03266	0	0.586505	0.496295	0	0.194721	-5.57562	385	0.274407	-1.03266	0	0.3795	-0.536365	0	0.095617	-6.60828	1587	0.586505	-0.496295	0	0.3795	0.536365	0	0.0967197	-6.07192	1086	0.194721	5.57562	385
485	Uracil	C4H4N2O2	-	111.02	-14.4	6.79	0.77	5	5939570	6165008	8847257	9208643	9769816	-	-	-	-	-	-	0.00285895	-0.615904	4108	3.90428e-05	1.09599	243190	3.90428e-05	1.09599	243190	0.00285895	0.615904	4108	1.785e-05	1.7119	1110925	1.785e-05	1.7119	1110925	3.90428e-05	-1.09599	243190	1.785e-05	-1.7119	1110925	NA	0	0	3.90428e-05	-1.09599	243190
486	Uridine	C9H12N2O6	-	243.062	-5.6	6.79	0.81	8	1363940	1223478	1965084	2030903	2469178	383268	260524	336001	-	-	-	0.0265014	-0.736212	108	0.000221892	2.9181	24950	0.000813199	1.98593	3946	0.0265014	0.736212	108	0.000232693	3.65432	62936	0.000352783	2.72214	23209	0.000221892	-2.9181	24950	0.000232693	-3.65432	62936	0.0121695	-0.932177	39	0.000813199	-1.98593	3946
487	Uroporphyrinogen I	C40H44N4O16	+	837.283	1.3	11.07	0.84	1	-	285057	-	-	-	-	-	-	-	-	-	0.272228	3.79936	4	0.272228	3.79936	4	0.272228	3.79936	4	0.272228	-3.79936	4	NA	0	0	NA	0	0	0.272228	-3.79936	4	NA	0	0	NA	0	0	0.272228	-3.79936	4
488	Uroporphyrinogen III	C40H44N4O16	+	837.283	1.3	11.07	0.84	1	-	285057	-	-	-	-	-	-	-	-	-	0.272228	3.79936	4	0.272228	3.79936	4	0.272228	3.79936	4	0.272228	-3.79936	4	NA	0	0	NA	0	0	0.272228	-3.79936	4	NA	0	0	NA	0	0	0.272228	-3.79936	4
489	UTP	C9H15N2O15P3	-	482.961	-0.9	15.15	0.1	2	-	-	-	14258	47495	-	-	-	-	-	-	0.430115	-1.25808	0	NA	0	0	NA	0	0	0.430115	1.25808	0	0.305439	1.25808	0	0.305439	1.25808	0	NA	0	0	0.305439	-1.25808	0	NA	0	0	NA	0	0
490	Vitamin K1	C31H46O2	+	451.357	-13.6	20.23	0.37	0	-	-	-	-	-	-	-	-	-	-	-	NA	0	0	NA	0	0	NA	0	0	NA	0	0	NA	0	0	NA	0	0	NA	0	0	NA	0	0	NA	0	0	NA	0	0
491	Xanthine	C5H4N4O2	-	151.026	-8.9	8.53	0.89	3	-	-	-	-	-	1247355	577446	1178100	-	-	-	NA	0	0	NA	0	0	0.0655725	-2.18101	42	NA	0	0	NA	0	0	0.0214251	-2.18101	129	NA	0	0	NA	0	0	0.0214251	-2.18101	129	0.0655725	2.18101	42
492	Xanthosine	C10H12N4O6	-	283.068	-6.7	7.85	0.61	7	43191	78825	111064	40777	115606	-	26232	29171	-	-	-	0.468226	-0.54722	0	0.0506937	1.68429	3	0.0792798	1.29893	1	0.468226	0.54722	0	0.0442577	2.23151	6	0.0577997	1.84615	4	0.0506937	-1.68429	3	0.0442577	-2.23151	6	0.127292	-0.385361	0	0.0792798	-1.29893	1
	** Columns B and C are the metabolite name and formula.
	** Columns D through H are accompanying data from the mass spectrometry instrument.
	** Column I indicates the number of samples from any life stage the metabolite was detected in.
	** Columns J through T indicate the relative quantity of metabolite detected for each sample; AF: adult female; AM: adult male; Mf: microfilaria; L3: larval stage 3.
	** Columns U through BD are the results of pairwise comparisons for each metabolite.
[truncated: 6 more columns]
