# Supplementary material for: Modeling the metabolic interplay between a parasitic worm and its bacterial endosymbiont allows the identification of novel drug targets
Source: eLife. 2020 Aug 11;9:e51850. doi: 10.7554/eLife.51850 (PMC7419141; doi:10.7554/eLife.51850)
Supplement: Supplementary file 3. [file elife-51850-supp3.xlsx]

## Sheet: Single knockouts
List of essential Brugia malayi genes, and prioritization information
Gene ID	# Reactions	Reaction	Associated genes	Objective %	Biomass deficiencies	Human homologs (#|% identity|% coverage)	O. volvulus homologs (#|% identity|% coverage)	# ChEMBL hits	ChEMBL hits (% identity|species)	Max expression	Larval expression (L3|L3D6|L3D9|L4)	Adult female expression (F30|F42|F120)	Adult male expression (M30|M42|M120)	Drug used to target gene product
Bm13876	1	R00004_M		0	unrecoverable	2 | 51.1 | 81.3		0		102.8	51 | 92 | 100 | 72	90 | 78 | 41	97 | 65 | 50
AAW70961	1	R00036_W		0	unrecoverable	2 | 37.2 | 90.0		8	CHEMBL3286081 (100 | Wolbachia sp. subsp. Brugia malayi (strain TRS)), CHEMBL3286084 (51 | Vibrio cholerae serotype O1 (strain M66-2)), CHEMBL3286086 (50 | Pseudomonas aeruginosa (strain ATCC 15692 / PAO1 / 1C / PRS 101 / LMG12228)), CHEMBL3286085 (49 | Yersinia enterocolitica W22703), CHEMBL3286082 (47 | Pisum sativum), CHEMBL3286083 (41 | Escherichia coli (strain K12)), CHEMBL3286087 (36 | Dros…	19.5	26 | 68 | 63 | 61	53 | 47 | 100	19 | 51 | 66
AAW70896	1	R00081_W	AAW70897,AAW71286	8.8	unrecoverable	2 | 56.8 | 98.3	5 | 89.1 | 99.8	2	CHEMBL6011 (58 | Ovis aries), CHEMBL6173 (57 | Homo sapiens)	80.4	100 | 32 | 42 | 72	93 | 56 | 55	84 | 80 | 36
AAW70897	1	R00081_W	AAW70896,AAW71286	8.8	unrecoverable	1 | 40.2 | 85.8	2 | 35.8 | 88.2	2	CHEMBL1250404 (39 | Ovis aries), CHEMBL6174 (40 | Homo sapiens)	188.8	24 | 34 | 33 | 46	29 | 48 | 30	40 | 49 | 100
AAW71286	1	R00081_W	AAW70896,AAW70897	8.8	unrecoverable	1 | 42.9 | 98.2	1 | 84.4 | 99.6	0		83.3	79 | 51 | 55 | 35	87 | 54 | 56	87 | 37 | 100
AAW71365	1	R00084_W		0	unrecoverable	1 | 37.6 | 72.9		0		36	100 | 46 | 52 | 44	45 | 20 | 29	29 | 4 | 60
AAW70606	1	R00086_W	AAW70769,AAW70794,AAW70840,AAW70841,AAW70888,AAW70903,AAW71116,AAW71216,AAW71223,AAW71277,AAW71296	0	infeasible			0		34.1	0 | 47 | 49 | 81	38 | 44 | 39	18 | 100 | 23
AAW70769	1	R00086_W	AAW70606,AAW70794,AAW70840,AAW70841,AAW70888,AAW70903,AAW71116,AAW71216,AAW71223,AAW71277,AAW71296	0	infeasible		1 | 89.7 | 99.6	0		17.3	0 | 30 | 41 | 100	60 | 19 | 64	26 | 10 | 17
AAW70794	1	R00086_W	AAW70606,AAW70769,AAW70840,AAW70841,AAW70888,AAW70903,AAW71116,AAW71216,AAW71223,AAW71277,AAW71296	0	infeasible	33 | 36.5 | 86.8	4 | 85.6 | 99.8	39	CHEMBL1293189 (31 | Homo sapiens), CHEMBL3467 (33 | Mus musculus), CHEMBL2111404 (33 | Mus musculus), CHEMBL1075135 (31 | Rattus norvegicus), CHEMBL2573 (31 | Mus musculus), CHEMBL1075229 (31 | Rattus norvegicus), CHEMBL4302 (31 | Homo sapiens), CHEMBL1743129 (31 | Homo sapiens), CHEMBL2073706 (30 | Rattus norvegicus), CHEMBL6020 (30 | Homo sapiens), CHEMBL2073674 (33 | Rattus norvegicus), CHEMBL…	7.9	94 | 56 | 64 | 74	34 | 46 | 35	44 | 100 | 97
AAW70840	1	R00086_W	AAW70606,AAW70769,AAW70794,AAW70841,AAW70888,AAW70903,AAW71116,AAW71216,AAW71223,AAW71277,AAW71296	0	infeasible			0		29.5	59 | 84 | 100 | 22	68 | 61 | 59	49 | 36 | 73
AAW70841	1	R00086_W	AAW70606,AAW70769,AAW70794,AAW70840,AAW70888,AAW70903,AAW71116,AAW71216,AAW71223,AAW71277,AAW71296	0	infeasible			0		21.9	24 | 87 | 76 | 37	68 | 83 | 86	100 | 45 | 36
AAW70888	1	R00086_W	AAW70606,AAW70769,AAW70794,AAW70840,AAW70841,AAW70903,AAW71116,AAW71216,AAW71223,AAW71277,AAW71296	0	infeasible		1 | 87.6 | 99.8	4	CHEMBL5643 (37 | Staphylococcus aureus), CHEMBL2176851 (39 | Bacillus anthracis), CHEMBL4511 (36 | Pseudomonas aeruginosa (strain ATCC 15692 / PAO1 / 1C / PRS 101 / LMG12228)), CHEMBL1741192 (32 | Mycobacterium tuberculosis)	27.2	48 | 81 | 89 | 66	69 | 67 | 74	100 | 83 | 45
AAW70903	1	R00086_W	AAW70606,AAW70769,AAW70794,AAW70840,AAW70841,AAW70888,AAW71116,AAW71216,AAW71223,AAW71277,AAW71296	0	infeasible	3 | 58.8 | 98.2	1 | 88.5 | 99.8	5	CHEMBL2062351 (59 | Homo sapiens), CHEMBL2176795 (59 | Rattus norvegicus), CHEMBL2366567 (55 | Spinacia oleracea), CHEMBL2364166 (51 | Mycobacterium tuberculosis), CHEMBL6106 (27 | Saccharomyces cerevisiae S288c)	89.8	92 | 70 | 63 | 100	78 | 82 | 75	72 | 77 | 81
AAW71116	1	R00086_W	AAW70606,AAW70769,AAW70794,AAW70840,AAW70841,AAW70888,AAW70903,AAW71216,AAW71223,AAW71277,AAW71296	0	infeasible			0		219.7	74 | 82 | 74 | 95	70 | 80 | 97	88 | 81 | 100
AAW71216	1	R00086_W	AAW70606,AAW70769,AAW70794,AAW70840,AAW70841,AAW70888,AAW70903,AAW71116,AAW71223,AAW71277,AAW71296	0	infeasible		1 | 85.4 | 99.8	0		18.6	74 | 51 | 36 | 25	66 | 58 | 54	38 | 37 | 100
AAW71223	1	R00086_W	AAW70606,AAW70769,AAW70794,AAW70840,AAW70841,AAW70888,AAW70903,AAW71116,AAW71216,AAW71277,AAW71296	0	infeasible			0		6.6	27 | 42 | 32 | 5	23 | 39 | 47	0 | 8 | 100
AAW71277	1	R00086_W	AAW70606,AAW70769,AAW70794,AAW70840,AAW70841,AAW70888,AAW70903,AAW71116,AAW71216,AAW71223,AAW71296	0	infeasible	1 | 70.2 | 96.1	1 | 89.8 | 50.0	6	CHEMBL612444 (70 | Bos taurus), CHEMBL2062350 (70 | Homo sapiens), CHEMBL2176796 (70 | Rattus norvegicus), CHEMBL1075103 (70 | Saccharomyces cerevisiae S288c), CHEMBL2366567 (65 | Spinacia oleracea), CHEMBL2364166 (59 | Mycobacterium tuberculosis)	251.3	70 | 49 | 41 | 56	79 | 52 | 64	57 | 53 | 100
AAW71296	1	R00086_W	AAW70606,AAW70769,AAW70794,AAW70840,AAW70841,AAW70888,AAW70903,AAW71116,AAW71216,AAW71223,AAW71277	0	infeasible	37 | 41.6 | 83.8		8	CHEMBL3751651 (35 | Mus musculus), CHEMBL5553 (35 | Homo sapiens), CHEMBL3751657 (35 | Mus musculus), CHEMBL3751650 (35 | Mus musculus), CHEMBL3309046 (34 | Mus musculus), CHEMBL2052028 (34 | Homo sapiens), CHEMBL2052029 (34 | Oryctolagus cuniculus), CHEMBL2010634 (29 | Homo sapiens)	261.6	35 | 65 | 72 | 100	77 | 72 | 53	88 | 95 | 34
Bm13739a	1	R00100		0	Bio_unsat (100.2) [C00219(100.1)]	6 | 60.8 | 83.4		1	CHEMBL2146 (61 | Homo sapiens)		-- | -- | -- | --	-- | -- | --	-- | -- | --
AAW70988	1	R00104_W		0	unrecoverable		1 | 81.4 | 99.6	0		41.7	76 | 75 | 60 | 28	40 | 25 | 71	100 | 47 | 68
Bm11298	1	R00127	Bm14014,Bm3099,Bm3343b,Bm3965,Bm9070	0	unrecoverable	1 | 47.1 | 93.6		0			-- | -- | -- | --	-- | -- | --	-- | -- | --
Bm14014	1	R00127	Bm11298,Bm3099,Bm3343b,Bm3965,Bm9070	0	unrecoverable	5 | 58.8 | 87.4		4	CHEMBL5709 (61 | Oryctolagus cuniculus), CHEMBL4925 (60 | Homo sapiens), CHEMBL3773 (60 | Rattus norvegicus), CHEMBL5681 (44 | Homo sapiens)	418.9	100 | 24 | 28 | 25	18 | 22 | 5	18 | 12 | 8	Tenofovir-associated
Bm3099	1	R00127	Bm11298,Bm14014,Bm3343b,Bm3965,Bm9070	0	unrecoverable			0			-- | -- | -- | --	-- | -- | --	-- | -- | --
Bm3343b	1	R00127	Bm11298,Bm14014,Bm3099,Bm3965,Bm9070	0	unrecoverable			0			-- | -- | -- | --	-- | -- | --	-- | -- | --
Bm3965	1	R00127	Bm11298,Bm14014,Bm3099,Bm3343b,Bm9070	0	unrecoverable	2 | 53.6 | 95.4		4	CHEMBL5681 (54 | Homo sapiens), CHEMBL3773 (40 | Rattus norvegicus), CHEMBL4925 (38 | Homo sapiens), CHEMBL5709 (40 | Oryctolagus cuniculus)	56.8	33 | 34 | 34 | 19	100 | 58 | 24	27 | 33 | 30	Tenofovir-associated
Bm9070	1	R00127	Bm11298,Bm14014,Bm3099,Bm3343b,Bm3965	0	unrecoverable	5 | 52.2 | 43.0		4	CHEMBL4925 (51 | Homo sapiens), CHEMBL3773 (49 | Rattus norvegicus), CHEMBL5709 (50 | Oryctolagus cuniculus), CHEMBL5681 (39 | Homo sapiens)	25.7	1 | 0 | 2 | 0	0 | 3 | 2	4 | 14 | 100	Tenofovir
AAW70910	1	R00127_W		0	unrecoverable		1 | 73.3 | 99.5	0		34.5	100 | 37 | 40 | 12	15 | 8 | 43	0 | 54 | 19	Tenofovir
Bm5592	1	R00130_M	Bm6972	0	unrecoverable	1 | 44.4 | 96.9		0		19.2	60 | 88 | 90 | 20	69 | 79 | 27	100 | 55 | 98
Bm6972	2	R00130_M	Bm5592	0	unrecoverable	2 | 37.5 | 75.2		0		12.3	74 | 83 | 76 | 62	68 | 95 | 63	100 | 59 | 77
AAW71305	2	R00156_W		0	unrecoverable	3 | 43.4 | 97.1		0		86.9	89 | 100 | 87 | 29	82 | 25 | 18	49 | 28 | 9
AAW71394	1	R00158_W		0	unrecoverable		1 | 84.7 | 99.6	0		87.1	75 | 57 | 57 | 50	88 | 75 | 62	67 | 100 | 68
Bm12226	1	R00177	Bm13857a	0	Bio_misc (106.0)			0			-- | -- | -- | --	-- | -- | --	-- | -- | --
Bm13857a	1	R00177	Bm12226	0	Bio_misc (106.0)			4	CHEMBL2111450 (67 | Rattus norvegicus), CHEMBL2195 (67 | Rattus norvegicus), CHEMBL3313835 (69 | Homo sapiens), CHEMBL2838 (68 | Rattus norvegicus)		-- | -- | -- | --	-- | -- | --	-- | -- | --
Bm12123	1	R00178	Bm13767	0	Bio_misc (106.0)		1 | 89.7 | 99.1	0		22.8	100 | 60 | 72 | 66	52 | 39 | 33	50 | 53 | 69
Bm13767	1	R00178	Bm12123	0	Bio_misc (106.0)		1 | 86.5 | 86.3	4	CHEMBL3584 (42 | Mus musculus), CHEMBL3808 (42 | Rattus norvegicus), CHEMBL4181 (42 | Homo sapiens), CHEMBL1667688 (33 | Trypanosoma brucei brucei (strain 927/4 GUTat10.1))	5.4	30 | 36 | 53 | 44	41 | 100 | 20	34 | 42 | 72
AAW70800	1	R00206_W		0	Bio_misc (106.0) [C00353(102.0)]		1 | 80.8 | 98.0	0		41.9	57 | 71 | 70 | 100	82 | 51 | 97	72 | 77 | 52
AAW71307	1	R00310_W		0	unrecoverable	3 | 33.6 | 99.1	1 | 81.5 | 98.5	0		17.1	0 | 69 | 51 | 49	45 | 61 | 37	42 | 100 | 49
AAW71305	2	R00330_W		0	unrecoverable	3 | 43.4 | 97.1		0		86.9	89 | 100 | 87 | 29	82 | 25 | 18	49 | 28 | 9
AAW71168	1	R00332_W		0	unrecoverable	2 | 37.0 | 94.9	1 | 83.2 | 94.4	0		21.8	0 | 36 | 67 | 30	28 | 37 | 24	21 | 11 | 100
Bm13820b	2	R00390_1	Bm5270,Bm5672	0	Bio_unsat (100.2) [C00219(100.1)]	9 | 45.4 | 97.5		0			-- | -- | -- | --	-- | -- | --	-- | -- | --
Bm5270	2	R00390_1	Bm13820b,Bm5672	0	Bio_unsat (100.2) [C00219(100.1)]	9 | 43.1 | 96.1		0		19.9	0 | 0 | 0 | 1	0 | 12 | 7	1 | 3 | 100
Bm5672	2	R00390_1	Bm13820b,Bm5270	0	Bio_unsat (100.2) [C00219(100.1)]	9 | 37.5 | 90.9		0			-- | -- | -- | --	-- | -- | --	-- | -- | --
Bm2622	1	R00416		0	Bio_cof (101.3) [C00043(100.2)]	1 | 36.1 | 97.0		0		27.4	73 | 71 | 67 | 100	85 | 75 | 95	63 | 92 | 77
AAW71137	1	R00511_W		0	Bio_misc (106.0) [C00353(102.0)]			0		26.1	0 | 55 | 45 | 31	29 | 26 | 100	50 | 72 | 40
AAW71100	1	R00575_W	AAW71242	0	unrecoverable	3 | 38.1 | 98.0	1 | 87.8 | 98.8	3	CHEMBL2362990 (38 | Homo sapiens), CHEMBL3093 (38 | Homo sapiens), CHEMBL2774 (38 | Mus musculus)	17.9	39 | 91 | 72 | 66	100 | 58 | 88	83 | 78 | 46
AAW71242	1	R00575_W	AAW71100	0	unrecoverable	3 | 31.7 | 96.6	1 | 76.4 | 99.7	3	CHEMBL2774 (33 | Mus musculus), CHEMBL3093 (32 | Homo sapiens), CHEMBL2362990 (31 | Homo sapiens)	73.7	53 | 85 | 90 | 100	60 | 94 | 65	88 | 91 | 58
AAW70710	1	R00658_W		0	Bio_misc (106.0) [C00353(102.0)]	2 | 44.3 | 96.7	2 | 83.5 | 98.4	1	CHEMBL3298 (48 | Homo sapiens)	18.8	17 | 54 | 54 | 81	79 | 66 | 100	63 | 81 | 65
Bm6243	1	R00742		0	Bio_unsat (100.2) [C00219(100.1)]	10 | 42.4 | 46.3	1 | 34.3 | 16.1	10	CHEMBL3108631 (39 | Mus musculus), CHEMBL4829 (39 | Homo sapiens), CHEMBL5125 (39 | Rattus norvegicus), CHEMBL3351 (42 | Homo sapiens), CHEMBL3086 (42 | Mus musculus), CHEMBL2397 (42 | Rattus norvegicus), CHEMBL2366438 (36 | Alopecurus japonicus), CHEMBL2366573 (44 | Hordeum vulgare), CHEMBL1641351 (29 | Bos taurus), CHEMBL2366494 (58 | Zea mays)	54.7	73 | 84 | 91 | 100	73 | 92 | 76	77 | 82 | 46
Bm13850	1	R00762		0	unrecoverable	3 | 59.0 | 92.1		4	CHEMBL4391 (59 | Rattus norvegicus), CHEMBL5360 (59 | Mus musculus), CHEMBL2263 (57 | Sus scrofa), CHEMBL3975 (58 | Homo sapiens)	44.7	100 | 47 | 50 | 66	48 | 53 | 14	68 | 39 | 32	MDL-29951
Bm13825f	1	R00768		0	Bio_cof (101.3) [C00043(100.2)]	1 | 59.2 | 99.6		1	CHEMBL1909481 (59 | Homo sapiens)		-- | -- | -- | --	-- | -- | --	-- | -- | --
AAW70724	1	R00830_W		0	unrecoverable	9 | 45.0 | 97.5	1 | 89.5 | 99.8	2	CHEMBL3217400 (30 | Sphingomonas paucimobilis), CHEMBL1250344 (31 | Homo sapiens)	70.2	63 | 80 | 66 | 92	73 | 97 | 77	100 | 87 | 58
Bm13746a	2	R00959	Bm6539	0	Bio_lipids (102.1) [C01194(100.1)]	3 | 58.7 | 99.3		0			-- | -- | -- | --	-- | -- | --	-- | -- | --
Bm6539	2	R00959	Bm13746a	0	Bio_lipids (102.1) [C01194(100.1)]	2 | 45.8 | 97.3		0		46.6	41 | 50 | 98 | 100	73 | 68 | 26	61 | 40 | 20
AAW71375	1	R00965_W		0	unrecoverable		1 | 82.7 | 99.6	0		24.8	29 | 83 | 98 | 22	96 | 79 | 100	46 | 94 | 0
Bm1732b	1	R01056		0	unrecoverable			0			-- | -- | -- | --	-- | -- | --	-- | -- | --
Bm3135	1	R01068	Bm5580	0	unrecoverable	1 | 54.0 | 86.9	2 | 56.0 | 86.6	5	CHEMBL2106 (54 | Homo sapiens), CHEMBL4695 (53 | Oryctolagus cuniculus), CHEMBL4916 (48 | Trypanosoma brucei brucei), CHEMBL4509 (46 | Leishmania mexicana), CHEMBL4156 (49 | Plasmodium falciparum)	14.5	95 | 69 | 88 | 43	96 | 100 | 56	87 | 85 | 95
Bm5580	1	R01068	Bm3135	0	unrecoverable	1 | 61.1 | 97.8	2 | 96.7 | 99.7	5	CHEMBL2106 (70 | Homo sapiens), CHEMBL4695 (69 | Oryctolagus cuniculus), CHEMBL4156 (54 | Plasmodium falciparum), CHEMBL4509 (50 | Leishmania mexicana), CHEMBL4916 (49 | Trypanosoma brucei brucei)	1320.7	100 | 46 | 47 | 53	40 | 63 | 11	52 | 33 | 40
AAW70844	1	R01072_W		0	unrecoverable	1 | 35.8 | 98.0	1 | 84.6 | 99.8	1	CHEMBL2362992 (36 | Homo sapiens)	185.6	41 | 31 | 26 | 15	41 | 44 | 41	26 | 37 | 100
AAW71091	2	R01083_W		0	unrecoverable		1 | 84.4 | 99.8	0		69.4	60 | 34 | 36 | 61	87 | 73 | 49	69 | 100 | 19
Bm13665	1	R01123		0	Bio_misc (106.0) [C00353(102.0)]	2 | 40.6 | 89.8		0		20.4	63 | 41 | 60 | 29	55 | 57 | 78	50 | 100 | 89
AAW70999	2	R01127_W		0	unrecoverable	1 | 37.2 | 84.3	1 | 84.0 | 97.5	3	CHEMBL2518 (37 | Homo sapiens), CHEMBL3430882 (37 | Homo sapiens), CHEMBL2277 (37 | Mus musculus)	33.1	100 | 94 | 90 | 64	20 | 27 | 59	40 | 51 | 23
AAW71115	1	R01130_W		0	unrecoverable	9 | 39.3 | 89.6	2 | 88.9 | 99.6	7	CHEMBL3329078 (53 | Bacillus anthracis), CHEMBL3630 (53 | Escherichia coli K-12), CHEMBL2111369 (39 | Homo sapiens), CHEMBL1822 (39 | Homo sapiens), CHEMBL2002 (39 | Homo sapiens), CHEMBL3169 (39 | Mus musculus), CHEMBL6145 (55 | Cryptosporidium parvum)	50.4	63 | 91 | 90 | 94	69 | 100 | 84	62 | 57 | 69
AAW70862	1	R01135_W		0	unrecoverable	2 | 41.9 | 95.9	1 | 82.0 | 99.5	1	CHEMBL4875 (41 | Homo sapiens)	40.5	100 | 90 | 77 | 77	22 | 72 | 70	35 | 59 | 77
Bm3350c	1	R01187	Bm6286	0	Bio_lipids (102.1) [C01194(100.1)]	2 | 46.1 | 83.8		3	CHEMBL1293238 (47 | Rattus norvegicus), CHEMBL1786 (46 | Homo sapiens), CHEMBL4505 (46 | Bos taurus)		-- | -- | -- | --	-- | -- | --	-- | -- | --
Bm6286	1	R01187	Bm3350c	0	Bio_lipids (102.1) [C01194(100.1)]			0		18.6	99 | 35 | 31 | 17	31 | 34 | 73	50 | 55 | 100
AAW70665	1	R01220_W		0	unrecoverable	5 | 47.6 | 94.2	1 | 78.2 | 99.3	3	CHEMBL2541 (47 | Homo sapiens), CHEMBL3137 (45 | Mus musculus), CHEMBL3621036 (46 | Homo sapiens)	52.7	24 | 39 | 37 | 37	100 | 49 | 37	62 | 55 | 30
Bm13820b	2	R01280	Bm5270,Bm5672	0	Bio_lipids (100.5) [C00550(78.8)]	9 | 45.4 | 97.5		0			-- | -- | -- | --	-- | -- | --	-- | -- | --
Bm5270	2	R01280	Bm13820b,Bm5672	0	Bio_lipids (100.5) [C00550(78.8)]	9 | 43.1 | 96.1		0		19.9	0 | 0 | 0 | 1	0 | 12 | 7	1 | 3 | 100
Bm5672	2	R01280	Bm13820b,Bm5270	0	Bio_lipids (100.5) [C00550(78.8)]	9 | 37.5 | 90.9		0			-- | -- | -- | --	-- | -- | --	-- | -- | --
Bm4074c	1	R01281		0	Bio_lipids (102.1) [C00550(100.2)]	11 | 54.9 | 78.8	1 | 27.8 | 60.8	3	CHEMBL1250344 (55 | Homo sapiens), CHEMBL1250343 (30 | Homo sapiens), CHEMBL3217400 (28 | Sphingomonas paucimobilis)		-- | -- | -- | --	-- | -- | --	-- | -- | --
AAW70973	1	R01397_W		0	unrecoverable	1 | 32.6 | 96.3	1 | 82.2 | 99.7	2	CHEMBL3093 (33 | Homo sapiens), CHEMBL2774 (34 | Mus musculus)	56.8	69 | 68 | 100 | 40	45 | 39 | 37	37 | 20 | 28
AAW71272	1	R01512_W		0	Bio_misc (106.0) [C00353(102.0)]	1 | 37.2 | 98.0	1 | 77.9 | 98.5	6	CHEMBL2362982 (37 | Trypanosoma brucei brucei (strain 927/4 GUTat10.1)), CHEMBL1741167 (37 | Trypanosoma brucei brucei), CHEMBL2674 (38 | Saccharomyces cerevisiae S288c), CHEMBL2096677 (37 | Homo sapiens), CHEMBL2886 (38 | Homo sapiens), CHEMBL2176815 (37 | Rattus norvegicus)	13.2	31 | 76 | 75 | 100	91 | 55 | 58	18 | 23 | 46
AAW70991	1	R01518_W		0	Bio_misc (106.0) [C00353(102.0)]		2 | 80.4 | 99.8	1	CHEMBL1741202 (32 | Leishmania major)	58.1	30 | 77 | 87 | 89	81 | 82 | 62	100 | 76 | 86
Bm2549b	1	R01799		0	unrecoverable	2 | 52.1 | 96.3		0			-- | -- | -- | --	-- | -- | --	-- | -- | --
AAW71378	1	R01870_W		0	unrecoverable		1 | 84.2 | 97.0	0		7.3	0 | 15 | 37 | 22	0 | 0 | 100	60 | 0 | 28
Bm13871	2	R01920		0	Bio_misc (106.0) [C00315(102.5)]	1 | 64.0 | 73.2		3	CHEMBL4232 (56 | Homo sapiens), CHEMBL2429 (60 | Rattus norvegicus), CHEMBL5803 (46 | Plasmodium falciparum)	23.6	78 | 89 | 84 | 45	63 | 53 | 76	84 | 52 | 100
AAW71034	1	R01993_W		0	unrecoverable	1 | 36.9 | 46.0	1 | 88.0 | 99.8	3	CHEMBL3102690 (42 | Bacillus anthracis), CHEMBL3093 (31 | Homo sapiens), CHEMBL2774 (31 | Mus musculus)	60.1	88 | 45 | 38 | 39	100 | 64 | 71	76 | 66 | 32
Bm1773	1	R02055		0	unrecoverable	4 | 42.9 | 75.3		0		14.2	71 | 94 | 100 | 96	86 | 68 | 72	78 | 59 | 83
Bm3756a	1	R02061		0	Bio_misc (106.0) [C00353(102.0)]	1 | 43.1 | 48.2		2	CHEMBL4769 (55 | Homo sapiens), CHEMBL1075251 (42 | Saccharomyces cerevisiae S288c)		-- | -- | -- | --	-- | -- | --	-- | -- | --
AAW70994	1	R02161_W		8.8	unrecoverable	1 | 43.8 | 86.5	1 | 80.0 | 99.5	1	CHEMBL2366433 (54 | Botryotinia fuckeliana (strain T4) (Noble rot fungus) (Botrytiscinerea))	129.6	53 | 46 | 44 | 37	51 | 59 | 49	32 | 47 | 100
Bm4604	1	R02241	Bm5125,Bm5597,Bm5620	0	unrecoverable			3	CHEMBL4772 (36 | Homo sapiens), CHEMBL2844 (33 | Mus musculus), CHEMBL3583 (33 | Homo sapiens)	21.3	52 | 55 | 29 | 19	100 | 52 | 90	63 | 94 | 78
Bm5125	1	R02241	Bm4604,Bm5597,Bm5620	0	unrecoverable	4 | 36.3 | 75.1		0		32.1	11 | 57 | 6 | 4	2 | 12 | 25	5 | 24 | 100
Bm5597	1	R02241	Bm4604,Bm5125,Bm5620	0	unrecoverable	1 | 35.7 | 52.7		0		5.2	93 | 76 | 67 | 36	36 | 79 | 57	100 | 42 | 84
Bm5620	1	R02241	Bm4604,Bm5125,Bm5597	0	unrecoverable			3	CHEMBL2844 (41 | Mus musculus), CHEMBL3583 (41 | Homo sapiens), CHEMBL4772 (38 | Homo sapiens)	20.4	44 | 100 | 55 | 46	45 | 48 | 28	80 | 23 | 41
Bm13871	2	R02869		0	Bio_misc (106.0) [C00750(102.8)]	1 | 64.0 | 73.2		3	CHEMBL4232 (56 | Homo sapiens), CHEMBL2429 (60 | Rattus norvegicus), CHEMBL5803 (46 | Plasmodium falciparum)	23.6	78 | 89 | 84 | 45	63 | 53 | 76	84 | 52 | 100
Bm10984	1	R03005	Bm3639	0	unrecoverable	3 | 38.6 | 48.7		0		22	69 | 53 | 47 | 56	43 | 100 | 36	46 | 62 | 63
Bm3639	1	R03005	Bm10984	0	unrecoverable	5 | 39.5 | 91.6		0		22	48 | 24 | 27 | 26	35 | 36 | 100	30 | 70 | 60
Bm1677	1	R03018	Bm2143d	0	unrecoverable	4 | 54.0 | 82.0		4	CHEMBL3542438 (58 | Homo sapiens), CHEMBL2469 (58 | Homo sapiens), CHEMBL2196 (58 | Mus musculus), CHEMBL5682 (58 | Homo sapiens)	64.9	100 | 78 | 85 | 83	88 | 90 | 59	75 | 88 | 53
Bm2143d	1	R03018	Bm1677	0	unrecoverable	7 | 49.7 | 85.2		3	CHEMBL3407326 (49 | Homo sapiens), CHEMBL3407327 (49 | Homo sapiens), CHEMBL3407328 (48 | Homo sapiens)		-- | -- | -- | --	-- | -- | --	-- | -- | --
Bm6972	2	R03035_M		0	unrecoverable	2 | 37.5 | 75.2		0		12.3	74 | 83 | 76 | 62	68 | 95 | 63	100 | 59 | 77
AAW70593	1	R03197_W		0	unrecoverable	1 | 34.0 | 93.1	1 | 71.0 | 96.0	1	CHEMBL1681619 (35 | Homo sapiens)	62.2	96 | 89 | 96 | 57	80 | 45 | 100	67 | 57 | 68
AAW71297	1	R03220_W		0	unrecoverable	2 | 40.7 | 85.0	1 | 82.8 | 99.6	2	CHEMBL1681618 (41 | Homo sapiens), CHEMBL2366495 (40 | Hordeum vulgare)	31.1	100 | 65 | 70 | 49	43 | 48 | 42	86 | 41 | 65
Bm3597	1	R03269		0	unrecoverable	1 | 52.0 | 33.2		0		33.4	58 | 52 | 52 | 58	71 | 82 | 81	67 | 67 | 100
Bm1745	1	R03858		0	Bio_sat (97.5) [C02679(97.2)]	9 | 60.4 | 87.5		2	CHEMBL1293315 (34 | Enterococcus faecalis), CHEMBL2616 (30 | Homo sapiens)	26.3	88 | 82 | 81 | 80	83 | 92 | 60	77 | 60 | 100
AAW71053	1	R04144_W		0	unrecoverable	2 | 41.4 | 99.3	1 | 86.3 | 99.8	3	CHEMBL3690 (43 | Mus musculus), CHEMBL3430882 (41 | Homo sapiens), CHEMBL3972 (41 | Homo sapiens)	60.6	100 | 62 | 72 | 84	57 | 56 | 59	74 | 55 | 31
AAW70817	1	R04208_W		0	unrecoverable	1 | 47.4 | 94.8	1 | 82.2 | 98.8	3	CHEMBL3430882 (47 | Homo sapiens), CHEMBL3972 (47 | Homo sapiens), CHEMBL3690 (47 | Mus musculus)	119.2	48 | 67 | 64 | 70	76 | 71 | 53	100 | 83 | 45
AAW70633	1	R04209_W	AAW70985	0	unrecoverable			0		26.6	39 | 76 | 78 | 65	59 | 100 | 43	30 | 60 | 45
AAW70985	1	R04209_W	AAW70633	0	unrecoverable		1 | 83.6 | 98.2	0		151.7	19 | 48 | 42 | 28	58 | 100 | 42	52 | 45 | 84
AAW70823	1	R04463_W	AAW70860	0	unrecoverable		1 | 80.4 | 99.6	0		30.3	62 | 65 | 60 | 42	69 | 34 | 50	100 | 64 | 16
AAW70860	1	R04463_W	AAW70823	0	unrecoverable		1 | 72.9 | 99.2	0		13.7	35 | 66 | 70 | 90	67 | 53 | 100	65 | 45 | 54
AAW71091	2	R04559_W		0	unrecoverable		1 | 84.4 | 99.8	0		69.4	60 | 34 | 36 | 61	87 | 73 | 49	69 | 100 | 19
AAW70999	2	R04560_W		0	unrecoverable	1 | 37.2 | 84.3	1 | 84.0 | 97.5	3	CHEMBL2518 (37 | Homo sapiens), CHEMBL3430882 (37 | Homo sapiens), CHEMBL2277 (37 | Mus musculus)	33.1	100 | 94 | 90 | 64	20 | 27 | 59	40 | 51 | 23
AAW70818	1	R04591_W		0	unrecoverable	2 | 34.5 | 97.5		0		34.6	0 | 73 | 100 | 28	32 | 31 | 27	65 | 16 | 11
Bm2467	1	R04740	Bm5593	0	Bio_sat (97.5) [C02679(97.2)]	3 | 49.1 | 91.8		2	CHEMBL3232 (30 | Rattus norvegicus), CHEMBL2176821 (35 | Rattus norvegicus)	71.9	29 | 38 | 44 | 69	100 | 75 | 28	62 | 35 | 35
Bm5593	1	R04740	Bm2467	0	Bio_sat (97.5) [C02679(97.2)]	3 | 53.4 | 84.8		1	CHEMBL3153 (54 | Rattus norvegicus)	30.3	58 | 58 | 57 | 77	93 | 84 | 46	98 | 72 | 100
AAW70680	1	R05332		0	Bio_cof (101.3) [C00043(100.2)]			4	CHEMBL1949487 (35 | Streptococcus pneumoniae serotype 4 (strain ATCC BAA-334 / TIGR4)), CHEMBL3559674 (33 | Escherichia coli), CHEMBL3414415 (33 | Escherichia coli (strain K12)), CHEMBL1293297 (31 | Mycobacterium tuberculosis)	24.7	29 | 45 | 52 | 100	43 | 22 | 52	79 | 26 | 56
AAW70997	2	R05633_W		0	Bio_misc (106.0) [C00353(102.0)]			3	CHEMBL2285351 (47 | Arabidopsis thaliana), CHEMBL3217375 (43 | Escherichia coli (strain K12)), CHEMBL3091270 (39 | Burkholderia pseudomallei (strain K96243))	12.8	100 | 51 | 71 | 44	31 | 33 | 57	35 | 58 | 83
AAW70764	1	R05634_W		0	Bio_misc (106.0) [C00353(102.0)]		1 | 84.4 | 99.7	0		43.1	100 | 27 | 43 | 56	71 | 32 | 34	41 | 26 | 80
AAW70997	2	R05637_W		0	Bio_misc (106.0) [C00353(102.0)]			3	CHEMBL2285351 (47 | Arabidopsis thaliana), CHEMBL3217375 (43 | Escherichia coli (strain K12)), CHEMBL3091270 (39 | Burkholderia pseudomallei (strain K96243))	12.8	100 | 51 | 71 | 44	31 | 33 | 57	35 | 58 | 83
AAW70770	1	R05688_W		0	Bio_misc (106.0) [C00353(102.0)]			6	CHEMBL2285354 (43 | Arabidopsis thaliana), CHEMBL3421521 (40 | Escherichia coli), CHEMBL4091 (40 | Escherichia coli K-12), CHEMBL4094 (42 | Synechocystis sp. (strain PCC 6803 / Kazusa)), CHEMBL2010623 (34 | Mycobacterium smegmatis (strain ATCC 700084 / mc(2)155)), CHEMBL5630 (34 | Mycobacterium tuberculosis)	36.7	31 | 45 | 50 | 30	73 | 31 | 43	100 | 84 | 9	Fosmidomycin
Bm4772	1	R06517		0	Bio_lipids (102.1) [C00550(100.2)]	6 | 31.8 | 90.1		0		32.6	100 | 92 | 30 | 12	11 | 23 | 35	23 | 26 | 39
AAW71147	1	R07618_W	AAW71149	27	Bio_misc (7.0) [C00353(7.0)]	8 | 35.8 | 95.4	2 | 31.9 | 94.8	22	CHEMBL2176826 (37 | Mus musculus), CHEMBL4061 (36 | Sus scrofa), CHEMBL6147 (29 | Plasmodium falciparum), CHEMBL1075170 (29 | Mycobacterium tuberculosis), CHEMBL5394 (28 | Crithidia fasciculata), CHEMBL1944500 (26 | Leishmania amazonensis), CHEMBL1944501 (26 | Leishmania infantum), CHEMBL2176840 (26 | Leishmania donovani), CHEMBL5154 (28 | Trypanosoma brucei brucei (strain 927/4 GUTat10.1)), CHEM…	32.6	78 | 78 | 77 | 85	76 | 82 | 97	45 | 66 | 100
AAW71149	1	R07618_W	AAW71147	27	Bio_misc (7.0) [C00353(7.0)]	4 | 49.9 | 98.9	2 | 81.8 | 99.8	13	CHEMBL4061 (50 | Sus scrofa), CHEMBL2176826 (49 | Mus musculus), CHEMBL6147 (34 | Plasmodium falciparum), CHEMBL2366476 (29 | Mus musculus), CHEMBL2755 (29 | Homo sapiens), CHEMBL5154 (28 | Trypanosoma brucei brucei (strain 927/4 GUTat10.1)), CHEMBL5131 (28 | Trypanosoma cruzi), CHEMBL4119 (29 | Saccharomyces cerevisiae S288c), CHEMBL1837 (28 | Trypanosoma brucei brucei), CHEMBL3286088 (27 | Ratt…	37.5	19 | 44 | 56 | 45	70 | 56 | 59	79 | 100 | 45
Bm14766	2	R08183		0	Bio_unsat (100.2) [C00219(100.1)]	1 | 53.7 | 94.9		1	CHEMBL2331051 (54 | Homo sapiens)	37.7	46 | 55 | 60 | 32	82 | 60 | 30	100 | 69 | 75
Bm13746a	2	R08639	Bm6539	0	Bio_lipids (102.1) [C01194(100.1)]	3 | 58.7 | 99.3		0			-- | -- | -- | --	-- | -- | --	-- | -- | --
Bm6539	2	R08639	Bm13746a	0	Bio_lipids (102.1) [C01194(100.1)]	2 | 45.8 | 97.3		0		46.6	41 | 50 | 98 | 100	73 | 68 | 26	61 | 40 | 20
AAW71370	1	R08689_W		0	Bio_misc (106.0) [C00353(102.0)]			0		32.3	100 | 36 | 39 | 27	45 | 59 | 61	57 | 67 | 23
Bm4329c	1	R08969	Bm4669,Bm9313	0	Bio_lipids (102.1) [C00550(100.2)]			0			-- | -- | -- | --	-- | -- | --	-- | -- | --
Bm4669	1	R08969	Bm4329c,Bm9313	0	Bio_lipids (102.1) [C00550(100.2)]	2 | 33.6 | 67.9		2	CHEMBL3112379 (35 | Homo sapiens), CHEMBL3611965 (39 | Homo sapiens)	23.7	43 | 100 | 73 | 75	81 | 74 | 36	66 | 58 | 35
Bm9313	1	R08969	Bm4329c,Bm4669	0	Bio_lipids (102.1) [C00550(100.2)]			1	CHEMBL3112379 (32 | Homo sapiens)	36.4	69 | 73 | 42 | 50	38 | 45 | 100	57 | 91 | 47
Bm14766	2	RCC1275		0	Bio_sat (100.4) [C02679(100.1)]	1 | 53.7 | 94.9		1	CHEMBL2331051 (54 | Homo sapiens)	37.7	46 | 55 | 60 | 32	82 | 60 | 30	100 | 69 | 75
** Columns A through D indicate the name of each essential gene, the number and identity of model reactions associated with that gene, and the names of any other associated genes. Genes highlighted in orange represent a shortlist of potential druggable reactions; Genes highlighted in yellow were targeted for validation, with the associated drug listed in Column O.
** Column E indicates the amount of biomass produced after knocking out each reaction (% of control).
** Column F indicates which category of biomass component rescued biomass production when added back to the knockout. If metabolite IDs are listed in square brackets, that indicates the single metabolite that was necessary; otherwise multiple metabolties were required to rescue biomass.
** Columns G and H indicate the number of BLAST hits, the percent identity of the best hit, and the percent covered by that hit, of each Brugia malayi gene queried against the human and Onchocerca volvulus proteomes, respectively.
** Columns I and J indicate the number of hits in the ChEMBL data when queried with each gene sequence, the identity of those hits, how similar the hit sequence was to the Brugia malayi gene sequence, and the species that hit came from.
** Column K indicates the maximum expression of each gene out of all of the modeled life stages.
** Columns L through N indicate the expression of each gene relative to the maximum (% of maximum).
** Note that of the 80 unique essential reactions, we only considered the 77 that led to no biomass production after being knocked out in silico.
